# Supplementary material for: CHERP Regulates the Alternative Splicing of pre-mRNAs in the Nucleus
Source: MDPI journal article supplement (doi:10.3390/ijms23052555), 2022-02-25
Supplement: s1 [file s1]

| Name    |           | Nucleotide sequence (5'→3')                        | Used in the       |
|---------|-----------|----------------------------------------------------|-------------------|
| EGFP    | Sense     | GGGCACAAGCUGGAGUACAACUACA                          | (various studies) |
|         | Antisense | UGUAGUUUGUACUCCAGCUUGUGCCC                         |                   |
| CAT     | Sense     | CAAUGAAAGACGGUGAGCUGGUGAU                          | live cell imaging |
|         | Antisense | (unpublished)                                      |                   |
| CHERP#1 | Sense     | GAGAAGAGAACAAAGGCCAUCAGAU                          | RNA-FISH          |
|         | Antisense | (unpublished)                                      |                   |
| CHERP#2 | Sense     | rGrGrUrUrUrArGrGrUrCrUrArGrArArGrArGrArArUAC       | (various studies) |
|         | Antisense | rGrUrArUrUrCrUrUrCrUrUrCrUrArGrArCrCrUrArArCrCrArA |                   |
| UAP56   | Sense     | CCUGAUGAGAUAGACAUCUCCUCCU                          | RNA-FISH          |
|         | Antisense | (unpublished)                                      |                   |
| NXT1    | Sense     | GAACUGGUUCAAGAUUACAAUCCU                           | RNA-FISH          |
|         | Antisense | (unpublished)                                      |                   |
