# Supplementary material for: CHERP Regulates the Alternative Splicing of pre-mRNAs in the Nucleus
Source: MDPI journal article supplement (doi:10.3390/ijms23052555), 2022-02-25
Supplement: s1 [file s1]

| GeneName | prot_desc        | prot_acc | prot_mass | prot_.score | prot_.matches |
|----------|------------------|----------|-----------|-------------|---------------|
|          | 1 Uncharacterize | K7EIP6   | 2801      | 0           | 0             |
|          | 2 Uncharacterize | H7BZT4   | 10832     | 124         | 2             |
|          | 3 Uncharacterize | H3BRM9   | 9615      | 0           | 0             |
|          | 4 Uncharacterize | H0YHG0   | 59149     | 34          | 0             |
|          | 5 Ig kappa chain | P01614   | 12668     | 0           | 1             |
|          | 6 Ig kappa chain | P01616   | 12048     | 0           | 0             |
|          | 7 Uncharacterize | F5H423   | 23331     | 133         | 2             |
|          | 8 Uncharacterize | H7C0C1   | 21328     | 39          | 1             |
| A2M      | Alpha-2-macro    | P01023   | 163188    | 0           | 0             |
| AAAS     | Aladin (Fragme   | H3BU82   | 38494     | 0           | 0             |
| AARD     | Alanine and arg  | Q4LEZ3   | 17564     | 0           | 0             |
| AATF     | Protein AATF (   | K7EK88   | 11404     | 0           | 0             |
| ABAT     | 4-aminobutyrai   | H3BNQ7   | 57886     | 0           | 0             |
| ABCA2    | ATP-binding cæ   | H0Y8C9   | 118053    | 0           | 0             |
| ABCB6    | ATP-binding cæ   | H7B XK9  | 77498     | 0           | 0             |
| ABCD3    | ATP-binding cæ   | F5GYC1   | 67273     | 0           | 0             |
| ABT1     | Activator of ba  | Q9ULW3   | 31060     | 0           | 0             |
| ACAD11   | ACAD11 protei    | Q08AE9   | 33755     | 0           | 0             |
| ACAT1    | Acetyl-CoA acæ   | G3XAB4   | 45171     | 220         | 4             |
| ACIN1    | Apoptotic chroi  | S4R3H4   | 145355    | 46          | 1             |
| ACTA1    | Actin, alpha sk  | Q5T8M7   | 37800     | 0           | 0             |
| ACTB     | Actin, cytoplas  | P60709   | 41710     | 0           | 0             |
| ACTBL2   | Beta-actin-like  | Q562R1   | 41976     | 0           | 0             |
| ACTC1    | Actin, alpha ca  | P68032   | 41992     | 0           | 0             |
| ACTG1    | Actin, cytoplas  | I3L1U9   | 23830     | 0           | 0             |
| ACTL6A   | Actin-like prote | O96019   | 47430     | 17          | 0             |
| ACTN1    | Alpha-actinin-1  | G3V2W4   | 27083     | 0           | 0             |
| ACTN4    | Alpha-actinin-4  | O43707   | 104788    | 133         | 3             |
| ACTR1A   | Alpha-centract   | B4DXP9   | 37457     | 0           | 0             |
| ACTR2    | Actin-related p  | F5H6T1   | 34501     | 0           | 0             |
| ADAD2    | Adenosine dea    | H3BNP6   | 28653     | 0           | 0             |
| ADAR     | Double-strandæ   | E7ENU4   | 140739    | 486         | 12            |
| ADARB1   | Adenosine dea    | G5E9B4   | 79957     | 0           | 0             |
| ADARB2   | Double-strandæ   | Q9NS39   | 80571     | 0           | 0             |
| ADD1     | Adducin 1 (Alp   | A2A3N8   | 73287     | 0           | 0             |
| ADD3     | Gamma-adduc      | Q9UEY8   | 79105     | 0           | 0             |
| AGO1     | Protein argona   | Q5TA58   | 88822     | 77          | 2             |
| AGO2     | Protein argona   | Q9UKV8   | 97146     | 0           | 0             |

|          |                          |        |     |   |
|----------|--------------------------|--------|-----|---|
| AHCTF1   | Protein ELYS C Q8WYP5    | 252342 | 0   | 0 |
| AHNAK    | Neuroblast diff Q09666   | 628699 | 79  | 2 |
| AIFM1    | Apoptosis-indu O95831    | 66859  | 0   | 0 |
| AK2      | Adenylate kina F8VY04    | 25614  | 201 | 5 |
| AKAP8    | A-kinase anchc O43823    | 76061  | 175 | 4 |
| AKAP8L   | A-kinase anchc Q9ULX6    | 71604  | 0   | 0 |
| AKR1B15  | Aldo-keto redu C9JRZ8    | 39435  | 0   | 0 |
| ALDOA    | Fructose-bisph H3BQN4    | 39793  | 343 | 7 |
| ALDOC    | Fructose-bisph P09972    | 39431  | 172 | 3 |
| ALG13    | Isoform 2 of Pl Q9NP73-2 | 18213  | 0   | 0 |
| ALYREF   | THO complex s E9PB61     | 27541  | 0   | 0 |
| ANKEF1   | Ankyrin repeat Q9NU02    | 86610  | 0   | 0 |
| ANKFY1   | Ankyrin repeat Q9P2R3    | 128318 | 55  | 1 |
| ANP32A   | Acidic leucine- H0YN26   | 19985  | 219 | 5 |
| ANP32B   | Acidic leucine- Q92688   | 28770  | 205 | 5 |
| ANXA1    | Annexin A1 OS P04083     | 38690  | 0   | 0 |
| ANXA2    | Annexin (Fragr H0YMD0    | 25326  | 60  | 1 |
| ANXA6    | Annexin OS=H E5RK69      | 51744  | 47  | 1 |
| AP2A1    | AP-2 complex : O95782    | 107478 | 0   | 0 |
| AP2A2    | AP-2 complex : O94973    | 103895 | 0   | 0 |
| AP2B1    | AP-2 complex : K7EJT8    | 101268 | 0   | 0 |
| AP2M1    | AP-2 complex : C9JJ47    | 28773  | 0   | 0 |
| AP2S1    | AP-2 complex : M0QYZ2    | 18917  | 0   | 0 |
| APEX1    | DNA-(apurinic G3V359     | 19156  | 73  | 1 |
| APH1B    | Gamma-secret H0YKZ9      | 20749  | 0   | 0 |
| API5     | Apoptosis inhib H0YER7   | 57525  | 69  | 1 |
| APRT     | Adenine phosp H3BQB1     | 17551  | 22  | 0 |
| AQR      | Intron-binding O60306    | 171186 | 47  | 1 |
| ARF3     | ADP-ribosylati B7ZB63    | 16135  | 0   | 0 |
| ARF4     | ADP-ribosylati P18085    | 20498  | 148 | 2 |
| ARF6     | ADP-ribosylati P62330    | 20069  | 38  | 1 |
| ARG1     | Arginase-1 OS: P05089    | 34713  | 0   | 0 |
| ARGLU1   | Arginine and gl Q9NWB6   | 33197  | 0   | 0 |
| ARHGEF18 | Rho guanine nu M0QZS0    | 91352  | 0   | 0 |
| ARID1B   | AT-rich interac H0Y2R3   | 76153  | 0   | 0 |
| ARID2    | AT-rich interac F8WCU9   | 175042 | 0   | 0 |
| ARL1     | ADP-ribosylati B4DWW1    | 18554  | 0   | 0 |
| ARMC5    | Armadillo repe: J3KQ26   | 108000 | 0   | 0 |
| ARPC2    | Actin related pr G5E9J0  | 10153  | 0   | 0 |

|                     |                  |          |        |     |
|---------------------|------------------|----------|--------|-----|
| ARPC4-TTLL3 Protein | ARPC4 F8WCF6     | 21045    | 0      | 0   |
| ASAP2               | Arf-GAP with S   | O43150   | 111581 | 0   |
| ATAD1               | ATPase family    | B4E2J1   | 30615  | 0   |
| ATAD3A              | ATPase family    | H0Y2W2   | 64315  | 0   |
| ATAD3B              | ATPase family    | Q5T9A4   | 72527  | 0   |
| ATP12A              | Potassium-trar   | P54707   | 115437 | 0   |
| ATP13A1             | Probable cation  | Q9HD20   | 132870 | 35  |
| ATP1A1              | Sodium/potass    | P05023   | 112824 | 0   |
| ATP1B3              | Sodium/potass    | H7C547   | 4914   | 0   |
| ATP2A2              | Sarcoplasmic/c   | P16615   | 114683 | 0   |
| ATP5A1              | ATP synthase s   | P25705   | 59714  | 149 |
| ATP5B               | ATP synthase s   | P06576   | 56525  | 0   |
| ATP5C1              | ATP synthase s   | B4DL14   | 27495  | 0   |
| ATP5D               | ATP synthase s   | P30049   | 17479  | 114 |
| ATP5G1              | ATP synthase     | H3L0Y5   | 10032  | 34  |
| ATP5J2-PTCD1        | Pentatricopept   | G3V325   | 84057  | 0   |
| ATP5L               | ATP synthase s   | E9PN17   | 8447   | 40  |
| ATP5O               | ATP synthase s   | H7C086   | 8128   | 0   |
| ATP6AP2             | Renin receptor   | H0Y750   | 26616  | 0   |
| ATP6V0A1            | V-type proton    | / F5H569 | 96251  | 0   |
| ATP6V1C1            | V-type proton    | / E7EV59 | 35686  | 0   |
| ATPIF1              | ATPase inhibitor | Q9UII2   | 12241  | 38  |
| BAG2                | BAG family mo    | A2A296   | 12173  | 0   |
| BANF1               | Barrier-to-auto  | O75531   | 10052  | 0   |
| BARD1               | BRCA1-associat   | E7EUI3   | 62141  | 0   |
| BAZ1A               | Bromodomain s    | Q9NRL2   | 178592 | 0   |
| BAZ1B               | Tyrosine-prote   | Q9UIG0   | 170796 | 0   |
| BCAP31              | B-cell receptor  | P51572   | 27974  | 157 |
| BCAS2               | Pre-mRNA-spli    | O75934   | 26115  | 0   |
| BCLAF1              | Bcl-2-associat   | E9PK09   | 83183  | 0   |
| BLOC1S6             | Biogenesis of l  | H3BMT8   | 5720   | 40  |
| BMS1                | Ribosome biog    | Q14692   | 145716 | 0   |
| BOLA2               | Bola-like prote  | H3BTW0   | 9848   | 53  |
| BRI3BP              | BRI3-binding p   | Q8WY22   | 27818  | 0   |
| BRIX1               | Ribosome biog    | Q8TDN6   | 41375  | 0   |
| BSG                 | Basigin OS=Hc    | P35613   | 42174  | 0   |
| BUB3                | Mitotic checkp   | J3QT28   | 31684  | 118 |
| BUD31               | Protein BUD31    | C9JNV2   | 13559  | 0   |
| BYSL                | Bystin (Fragme   | H7BY94   | 20988  | 0   |

|           |                         |        |      |    |
|-----------|-------------------------|--------|------|----|
| C11orf84  | Uncharacterize Q9BUA3   | 41011  | 0    | 0  |
| C12orf23  | UPF0444 trans Q8WUH6    | 11741  | 0    | 0  |
| C14orf166 | UPF0568 prote Q9Y224    | 28051  | 450  | 9  |
| C16orf80  | UPF0468 prote Q9Y6A4    | 22760  | 199  | 4  |
| C19orf10  | UPF0556 prote Q969H8    | 18783  | 64   | 2  |
| C19orf43  | Uncharacterize Q9BQ61   | 18408  | 197  | 9  |
| C1QBP     | Complement c Q07021     | 31343  | 116  | 2  |
| C21orf33  | ES1 protein ho H7C1F6   | 27429  | 54   | 1  |
| C4A       | Complement C P0C0L4     | 192664 | 0    | 0  |
| C4orf22   | Uncharacterize G5E9Y8   | 17782  | 0    | 0  |
| C6orf47   | Uncharacterize O95873   | 31690  | 0    | 0  |
| CALM2     | Calmodulin (Fr H0Y7A7   | 20749  | 50   | 1  |
| CALML3    | Calmodulin-like P27482  | 16880  | 0    | 0  |
| CALR      | Calreticulin OS P27797  | 48112  | 252  | 7  |
| CALU      | Calumenin OS= O43852    | 37084  | 0    | 0  |
| CAND1     | Cullin-associat Q86VP6  | 136289 | 38   | 1  |
| CANX      | Calnexin OS=F B4DGP8    | 71458  | 0    | 0  |
| CAPZA1    | F-actin-cappin P52907   | 32902  | 0    | 0  |
| CAPZA2    | F-actin-cappin P47755   | 32929  | 0    | 0  |
| CAPZB     | Capping protei B1AK87   | 29277  | 0    | 0  |
| CASK      | Peripheral plas Q5JS72  | 59327  | 0    | 0  |
| CASP14    | Caspase-14 OS P31944    | 27662  | 0    | 0  |
| CBX1      | Chromobox prc J3KS05    | 20115  | 41   | 1  |
| CBX3      | Chromobox prc Q13185    | 20798  | 0    | 0  |
| CBX5      | Chromobox prc P45973    | 22211  | 0    | 0  |
| CCAR1     | Cell division cy Q8IX12 | 132739 | 1828 | 46 |
| CCDC154   | Coiled-coil don H3BS06  | 11274  | 0    | 0  |
| CCDC181   | Coiled-coil don Q5TID7  | 60066  | 0    | 0  |
| CCNK      | Cyclin-K OS=F G3V5E1    | 43377  | 0    | 0  |
| CCT4      | T-complex prot B7Z2F4   | 57888  | 163  | 4  |
| CCT5      | T-complex prot B4DYD8   | 49495  | 58   | 1  |
| CCT8      | T-complex prot B4DEM7   | 57608  | 31   | 1  |
| CDC40     | Pre-mRNA-pro Q5SRN1     | 60792  | 0    | 0  |
| CDC5L     | Cell division cy Q99459 | 92194  | 0    | 0  |
| CDIPT     | CDP-diacylglyc B3KY94   | 25929  | 0    | 0  |
| CDK2      | Cyclin-depende G3V5T9   | 39153  | 0    | 0  |
| CENPV     | Centromere prc Q7Z7K6   | 29927  | 0    | 0  |
| CERS2     | Ceramide synt H0YKH6    | 26788  | 0    | 0  |
| CFL1      | Cofilin 1 (Non- G3V1A4  | 16801  | 33   | 1  |

|         |                   |          |        |      |    |
|---------|-------------------|----------|--------|------|----|
| CFTR    | Cystic fibrosis   | E7EPB6   | 163250 | 35   | 1  |
| CHCHD3  | Coiled-coil-hel   | G3V1K1   | 15549  | 0    | 0  |
| CHD1    | Chromodomain      | O14646   | 196567 | 0    | 0  |
| CHD3    | Chromodomain      | Q12873   | 226450 | 0    | 0  |
| CHD4    | Chromodomain      | F5GWX5   | 216967 | 111  | 3  |
| CHD7    | Chromodomain      | Q9P2D1   | 335717 | 0    | 0  |
| CHD8    | Chromodomain      | H0YJG4   | 101664 | 0    | 0  |
| CHERP   | Calcium homeo     | Q8IWX8   | 103637 | 1107 | 64 |
| CHMP1A  | Charged multiv    | F8VUA2   | 19519  | 0    | 0  |
| CHMP5   | Charged multiv    | Q9NZZ3   | 24555  | 0    | 0  |
| CHN1    | N-chimaerin       | O1B8ZZ96 | 31322  | 30   | 1  |
| CHTOP   | Chromatin targ    | Q9Y3Y2   | 26380  | 0    | 0  |
| CIRBP   | Cold-inducible    | B4E2X2   | 28342  | 6    | 0  |
| CIRH1A  | Cirhin (Fragme    | H3BSH7   | 77894  | 0    | 0  |
| CISD2   | CDGSH iron-su     | I3L1N9   | 5141   | 0    | 0  |
| CKAP4   | Cytoskeleton-a    | Q07065   | 65983  | 0    | 0  |
| CKAP5   | Cytoskeleton-a    | Q14008   | 225352 | 123  | 3  |
| CKB     | Creatine kinas    | P12277   | 42617  | 103  | 2  |
| CKMT1A  | Creatine kinas    | P12532   | 47007  | 71   | 2  |
| CLIC4   | Chloride intrac   | Q9Y696   | 28754  | 0    | 0  |
| CLINT1  | Clathrin interac  | Q14677   | 68216  | 0    | 0  |
| CLK3    | CDC-like kinas    | G5E959   | 56193  | 0    | 0  |
| CLPB    | Caseinolytic pe   | H0YFF5   | 37195  | 0    | 0  |
| CLTA    | Clathrin light cl | P09496   | 27060  | 0    | 0  |
| CLTB    | Clathrin light cl | P09497   | 25175  | 0    | 0  |
| CLTC    | Clathrin heavy    | Q00610   | 191493 | 653  | 13 |
| CMAS    | N-acylneurami     | F5GYM0   | 11647  | 0    | 0  |
| CNPY2   | Protein canopy    | F8VXJ7   | 19040  | 52   | 1  |
| CNTNAP4 | Contactin-assc    | F5H107   | 139833 | 11   | 1  |
| CNTROB  | Centrobins OS=    | Q8N137   | 101191 | 0    | 0  |
| COIL    | Coilin OS=Horr    | P38432   | 62570  | 0    | 0  |
| COL1A1  | Collagen alpha    | P02452   | 138857 | 0    | 0  |
| COL1A2  | Collagen alpha    | P08123   | 129235 | 0    | 0  |
| COMT    | Catechol O-me     | E7EMS6   | 24822  | 47   | 1  |
| COPA    | Coatamer subu     | P53621   | 138258 | 0    | 0  |
| COPB1   | Coatamer subu     | E9PP73   | 55502  | 0    | 0  |
| COPB2   | Coatamer prote    | B4DZI8   | 98984  | 47   | 1  |
| COPG2   | Coatamer subu     | Q9UBF2   | 97560  | 48   | 1  |
| CORO1C  | Coronin-1C OS     | Q9ULV4   | 53215  | 0    | 0  |

|                     |                         |        |     |   |
|---------------------|-------------------------|--------|-----|---|
| COX17               | Cytochrome c c C9J8T6   | 10846  | 0   | 0 |
| COX4I1              | Cytochrome c c H3BN72   | 14359  | 0   | 0 |
| COX5A               | Cytochrome c c H3BNX8   | 17224  | 0   | 0 |
| COX5B               | Cytochrome c c P10606   | 13687  | 0   | 0 |
| COX6B1              | Cytochrome c c P14854   | 10186  | 0   | 0 |
| COX6C               | Cytochrome c c P09669   | 8776   | 0   | 0 |
| COX7A2              | Cytochrome c c H0UI06   | 12836  | 59  | 1 |
| COX7C               | Cytochrome c c D6R9Z7   | 6378   | 0   | 0 |
| CPA5                | Carboxypeptidæ Q8WXQ8   | 49005  | 30  | 1 |
| CPD                 | Carboxypeptidæ O75976   | 152835 | 0   | 0 |
| CPSF1               | Cleavage and p Q10570   | 160782 | 76  | 2 |
| CPSF2               | Cleavage and p Q9P2I0   | 88431  | 0   | 0 |
| CPSF3               | Cleavage and p G5E9W3   | 73430  | 0   | 0 |
| CPSF4               | Cleavage and p B7Z7B0   | 21942  | 0   | 0 |
| CPSF6               | Cleavage and p F8WJN3   | 52238  | 223 | 4 |
| CPSF7               | Cleavage and p F5H669   | 41241  | 150 | 3 |
| CPVL                | Probable serine Q9H3G5  | 54129  | 88  | 2 |
| CREB3               | Cyclic AMP-res O43889   | 43889  | 0   | 0 |
| CRNKL1              | Crooked neck-l Q5JY65   | 99111  | 0   | 0 |
| CROCC               | Rootletin (Frag B1AKD8  | 149087 | 0   | 0 |
| CRTAP               | Cartilage-asso C9JP16   | 41406  | 178 | 5 |
| CRYAB               | Alpha-crystallin E9PJL7 | 15436  | 0   | 0 |
| CS                  | Citrate synthase H0YIC4 | 14114  | 73  | 1 |
| CSE1L               | Exportin-2 OS= B4DUC5   | 85418  | 0   | 0 |
| CSNK2A1             | Casein kinase I E7EU96  | 45282  | 0   | 0 |
| CSNK2B-LY6G Chimera | CSNK Q5SRQ3             | 26656  | 68  | 1 |
| CST6                | Cystatin-M OS Q15828    | 16500  | 0   | 0 |
| CSTA                | Cystatin-A OS= C9J0E4   | 7082   | 0   | 0 |
| CSTB                | Cystatin-B OS= P04080   | 11133  | 0   | 0 |
| CSTF1               | Cleavage stimu Q05048   | 48327  | 0   | 0 |
| CSTF2               | Cleavage stimu E7EWR4   | 62902  | 0   | 0 |
| CTBP2               | C-terminal-bin Q5SQP8   | 56066  | 32  | 1 |
| CTNNB1              | Catenin beta-1 B4DGU4   | 84712  | 0   | 0 |
| CTNNBL1             | Beta-catenin-li B4DE16  | 61932  | 0   | 0 |
| CTNND1              | Catenin delta-1 C9JZR2  | 104784 | 0   | 0 |
| CTSD                | Cathepsin D lig H7C1V0  | 20359  | 0   | 0 |
| CTTNBP2             | Cortactin-bindin H0Y448 | 125549 | 2   | 0 |
| CUL4B               | Cullin 4B, isofo K4DI93 | 102691 | 0   | 0 |
| CYB5B               | Cytochrome b5 H3BUX2    | 15707  | 0   | 0 |

|              |                                    |        |      |    |
|--------------|------------------------------------|--------|------|----|
| CYB5R3       | NADH-cytochrome b1A                | 16686  | 0    | 0  |
| CYCS         | Cytochrome c (C9JFR7               | 11326  | 50   | 1  |
| DAD1         | Dolichyl-diphosphate F5GXX5        | 9548   | 91   | 2  |
| DAPP1        | Dual adapter for J3KNB3            | 30156  | 1    | 0  |
| DAZAP1       | DAZ-associated K7EQ02              | 24789  | 84   | 1  |
| DBN1         | Drebrin OS=Hc Q16643               | 71385  | 0    | 0  |
| DCAKD        | Dephospho-Co K7ESP4                | 24162  | 0    | 0  |
| DCD          | Dermcidin OS= P81605               | 11277  | 0    | 0  |
| DCXR         | L-xylulose reductase J3KRZ4        | 14883  | 56   | 1  |
| DDB1         | DNA damage-binding F5GY55          | 126887 | 119  | 3  |
| DDOST        | Dolichyl-diphosphate E7EWT1        | 46548  | 0    | 0  |
| DDRGK1       | DDRKG domain Q96HY6                | 35589  | 0    | 0  |
| DDX1         | ATP-dependent Q92499               | 82380  | 70   | 1  |
| DDX17        | Probable ATP- H3BLZ8               | 80389  | 225  | 6  |
| DDX18        | ATP-dependent Q9NVP1               | 75359  | 0    | 0  |
| DDX21        | Nucleolar RNA Q9NR30               | 87290  | 0    | 0  |
| DDX23        | Probable ATP- Q9BUQ8               | 95524  | 0    | 0  |
| DDX27        | Probable ATP- Q96GQ7               | 89779  | 0    | 0  |
| DDX39A       | ATP-dependent O00148               | 49098  | 62   | 1  |
| DDX39B       | Spliceosome R F8VQ10               | 50713  | 59   | 1  |
| DDX3X        | ATP-dependent O00571               | 73198  | 218  | 2  |
| DDX3Y        | Uncharacterized B4DXX7             | 72886  | 0    | 0  |
| DDX41        | Probable ATP- J3KNN5               | 71603  | 0    | 0  |
| DDX42        | ATP-dependent Q86XP3               | 102912 | 35   | 1  |
| DDX46        | Probable ATP- H0Y9U3               | 117290 | 38   | 1  |
| DDX47        | Probable ATP- Q9H0S4               | 50615  | 0    | 0  |
| DDX5         | Probable ATP- J3KTA4               | 69044  | 233  | 6  |
| DEK          | Protein DEK (F H0Y8X0              | 18540  | 0    | 0  |
| DHCR7        | 7-dehydrocholesterol Q9UBM7        | 54454  | 35   | 1  |
| DHX15        | Putative pre-m O43143              | 90875  | 1481 | 67 |
| DHX30        | Putative ATP-c H7BXY3              | 130469 | 0    | 0  |
| DHX37        | Probable ATP- F5H3Y4               | 107235 | 0    | 0  |
| DHX9         | ATP-dependent Q08211               | 140869 | 0    | 0  |
| DIABLO       | Diablo homolog F5GXT8              | 15243  | 66   | 1  |
| DIDO1        | Death-inducer Q9BTC0               | 243723 | 0    | 0  |
| DKC1         | H/ACA ribonuclease O60832          | 57638  | 0    | 0  |
| DKFZP586J061 | DKFZP586J061A4D212                 | 265588 | 0    | 0  |
| DKFZp781K131 | NADH dehydrogenase Q5H9R2          | 13554  | 0    | 0  |
| DLD          | Dihydrolipoyl dehydrogenase B4DHG0 | 43560  | 200  | 3  |

|          |                                              |        |     |    |
|----------|----------------------------------------------|--------|-----|----|
| DNAI2    | Dynein intermediate chain 2                  | 74800  | 32  | 1  |
| DNAJA1   | DnaJ homolog P31689                          | 44839  | 0   | 0  |
| DNAJA2   | DnaJ homolog O60884                          | 45717  | 36  | 1  |
| DNAJA3   | DnaJ homolog E7ES32                          | 33061  | 42  | 1  |
| DNAJB11  | DnaJ homolog H7C2Y5                          | 19346  | 0   | 0  |
| DNAJB12  | DnaJ (Hsp40) H3KPS0                          | 45462  | 0   | 0  |
| DNAJC10  | DnaJ homolog Q8IXB1                          | 91021  | 35  | 0  |
| DNAJC17  | DnaJ homolog Q9NVM6                          | 34666  | 0   | 0  |
| DNAJC8   | DnaJ homolog O75937                          | 29823  | 666 | 24 |
| DNAJC9   | DnaJ homolog Q8WXX5                          | 29891  | 0   | 0  |
| DNMT1    | Cytosine-specific DNA methyltransferase 1    | 183267 | 34  | 1  |
| DOCK7    | Dedicator of cytokinesis 7                   | 147350 | 0   | 0  |
| DPYSL5   | Dihydropyrimidinase-related protein 5        | 20853  | 0   | 0  |
| DRAP1    | Dr1-associated protein 1                     | 23190  | 0   | 0  |
| DROSHA   | Ribonuclease H1A1                            | 159214 | 0   | 0  |
| DSG1     | Desmoglein-1                                 | 113676 | 0   | 0  |
| DSP      | Desmoplakin C                                | 331569 | 0   | 0  |
| DYNC1H1  | Cytoplasmic dynein 1 heavy chain 1           | 532072 | 774 | 17 |
| DYNLL2   | Dynein light chain 2                         | 10343  | 0   | 0  |
| DYNLRB1  | Dynein light chain B1                        | 16242  | 0   | 0  |
| EBP      | 3-beta-hydroxyacyl-CoA dehydrogenase         | 26336  | 0   | 0  |
| ECHS1    | Enoyl-CoA hydratase                          | 31367  | 79  | 2  |
| ECI1     | Enoyl-CoA hydratase 1                        | 24689  | 54  | 1  |
| EDC4     | Enhancer of myelination 4                    | 151567 | 32  | 1  |
| EDF1     | Endothelial differentiation factor 1         | 16359  | 48  | 1  |
| EEF1A1   | Elongation factor 1A1                        | 15926  | 0   | 0  |
| EEF1A1P5 | Putative elongation factor 1A1P5             | 50153  | 28  | 2  |
| EEF1A2   | Elongation factor 1A2                        | 50438  | 429 | 12 |
| EEF1B2   | Elongation factor 1B2                        | 24748  | 0   | 0  |
| EEF1D    | Elongation factor 1D                         | 22934  | 0   | 0  |
| EEF1G    | Elongation factor 1G                         | 56114  | 232 | 5  |
| EEF2     | Elongation factor 2                          | 95277  | 22  | 0  |
| EFTUD2   | 116 kDa U5 small ribosomal subunit protein   | 108215 | 170 | 4  |
| EIF1AY   | Eukaryotic translation initiation factor 1AY | 14446  | 0   | 0  |
| EIF3A    | Eukaryotic translation initiation factor 3A  | 162537 | 0   | 0  |
| EIF3C    | Eukaryotic translation initiation factor 3C  | 104036 | 0   | 0  |
| EIF3I    | Eukaryotic translation initiation factor 3I  | 14073  | 0   | 0  |
| EIF4A1   | Eukaryotic translation initiation factor 4A1 | 46125  | 0   | 1  |
| EIF4A2   | Eukaryotic translation initiation factor 4A2 | 41264  | 33  | 1  |



|         |                  |         |        |     |   |
|---------|------------------|---------|--------|-----|---|
| EIF4A3  | Eukaryotic initi | P38919  | 46841  | 197 | 4 |
| EIF4B   | Eukaryotic tran  | E7EX17  | 69657  | 0   | 0 |
| EIF4H   | Eukaryotic tran  | Q15056  | 27368  | 82  | 2 |
| EIF5A   | Eukaryotic tran  | I3L397  | 16108  | 203 | 5 |
| EIF6    | Eukaryotic tran  | P56537  | 26582  | 0   | 0 |
| ELAVL1  | ELAV-like prot   | B4DVB8  | 38972  | 182 | 3 |
| EMD     | Emerin OS=Ho     | P50402  | 28976  | 0   | 0 |
| ENDOV   | Endonuclease     | 'E5RGZ9 | 13239  | 30  | 1 |
| ENO1    | Alpha-enolase    | P06733  | 47139  | 193 | 4 |
| ENO2    | Enolase OS=H     | F5H0C8  | 34741  | 0   | 0 |
| ENY2    | Transcription a  | Q9NPA8  | 11521  | 0   | 0 |
| EP400   | E1A-binding pr   | Q96L91  | 343276 | 32  | 1 |
| EPB41L2 | Band 4.1-like p  | O43491  | 112519 | 0   | 0 |
| EPN2    | Epsin-2 OS=H     | I3L2B2  | 61514  | 0   | 0 |
| EPN3    | Epsin-3 OS=H     | B4DIQ9  | 28336  | 0   | 0 |
| ERH     | Enhancer of ru   | P84090  | 12251  | 0   | 0 |
| ERLIN1  | Erlin-1 OS=Ho    | O75477  | 38901  | 0   | 0 |
| ERLIN2  | Erlin-2 (Fragm   | E5RHW4  | 37701  | 0   | 0 |
| ERP29   | Endoplasmic re   | P30040  | 28975  | 75  | 1 |
| ESYT1   | Extended syna    | Q9BSJ8  | 122780 | 0   | 0 |
| ETFA    | Electron transf  | H0YK49  | 24145  | 92  | 2 |
| ETFB    | Electron transf  | P38117  | 27826  | 82  | 2 |
| EWSR1   | RNA-binding p    | B0QYK0  | 64889  | 4   | 1 |
| EXOSC10 | Exosome comp     | Q01780  | 100768 | 0   | 0 |
| EXOSC4  | Exosome comp     | E9PI41  | 28395  | 0   | 0 |
| EXOSC5  | Exosome comp     | M0R050  | 21243  | 0   | 0 |
| EXOSC6  | Exosome comp     | Q5RKV6  | 28218  | 0   | 0 |
| EXOSC9  | Exosome comp     | D6RIY6  | 46948  | 0   | 0 |
| EZR     | Ezrin OS=Hom     | P15311  | 69370  | 0   | 0 |
| FAM124B | Protein FAM12    | Q9H5Z6  | 50929  | 0   | 0 |
| FAM184B | Protein FAM18    | Q9ULE4  | 120969 | 0   | 0 |
| FAM208A | Protein FAM20    | Q9UK61  | 188914 | 0   | 0 |
| FAM25A  | Protein FAM25    | B3EWG3  | 9314   | 0   | 0 |
| FAM98A  | Protein FAM98    | B4DT23  | 34066  | 0   | 0 |
| FANCD2  | Fanconi anemi    | Q9BXW9  | 166356 | 0   | 0 |
| FANCI   | Fanconi anemi    | H3BP78  | 122868 | 0   | 0 |
| FARP2   | FERM, RhoGEF     | F5GZ84  | 72217  | 33  | 1 |
| FASN    | Fatty acid synt  | P49327  | 273254 | 40  | 1 |
| FAU     | 40S ribosomal    | E9PR30  | 10898  | 0   | 0 |

|         |                  |          |        |     |    |
|---------|------------------|----------|--------|-----|----|
| FBL     | rRNA 2~-O-me     | M0QXL5   | 26623  | 34  | 1  |
| FBLL1   | rRNA/tRNA 2~     | R4GMW7   | 34782  | 0   | 0  |
| FEN1    | Flap endonucle   | F5H1Y3   | 18263  | 0   | 0  |
| FHL1    | Four and a half  | Q5JXH7   | 23310  | 0   | 0  |
| FIP1L1  | Pre-mRNA 3~-     | Q6UN15   | 66487  | 0   | 0  |
| FKBP8   | Peptidyl-prolyl  | J3KQ73   | 47114  | 0   | 0  |
| FLG     | Filaggrin OS=    | F P20930 | 434922 | 0   | 0  |
| FLG2    | Filaggrin-2 OS=  | Q5D862   | 247928 | 0   | 0  |
| FLII    | Protein flightle | Q13045   | 144659 | 0   | 0  |
| FLNA    | Filamin-A OS=    | Q5HY54   | 276378 | 364 | 9  |
| FLNB    | Filamin-B OS=    | O75369   | 277990 | 0   | 0  |
| FLOT1   | Flotillin-1 (Fra | ξ A2AB09 | 27310  | 0   | 0  |
| FLOT2   | Flotillin-2 OS=  | J3QLD9   | 47113  | 0   | 0  |
| FMR1    | Fragile X ment   | :G8JL90  | 68924  | 0   | 0  |
| FNBP4   | Formin-binding   | ξ Q8N3X1 | 110198 | 0   | 0  |
| FNDC1   | Fibronectin typ  | J3KNQ2   | 194424 | 0   | 0  |
| FUBP1   | Far upstream ε   | B4DT31   | 69821  | 143 | 3  |
| FUBP3   | Far upstream ε   | Q96I24   | 61602  | 0   | 0  |
| FUS     | RNA-binding p    | P35637   | 53465  | 533 | 17 |
| FXR1    | Fragile X ment   | :B4DXZ6  | 68285  | 0   | 0  |
| FXR2    | Fragile X ment   | :P51116  | 74178  | 0   | 0  |
| GABRA4  | Gamma-amino D    | 6R924    | 4265   | 0   | 0  |
| GANAB   | Neutral alpha-ξ  | Q14697   | 106807 | 355 | 9  |
| GAPDH   | Glyceraldehyde   | ε E7EUT5 | 36030  | 204 | 6  |
| GATAD2B | Transcriptional  | Q8WXI9   | 65220  | 0   | 0  |
| GCN1L1  | Translational a  | Q92616   | 292572 | 256 | 7  |
| GDI2    | Rab GDP disso    | E7EU23   | 51148  | 0   | 0  |
| GEMIN5  | Gem-associate    | Q8TEQ6   | 168483 | 0   | 0  |
| GFAP    | Glial fibrillary | a P14136 | 49850  | 0   | 0  |
| GIGYF2  | PERQ amino α     | I1E4Y6   | 152434 | 42  | 1  |
| GK      | Glycerol kinase  | H7C2A0   | 13093  | 39  | 1  |
| GK3P    | Putative glycer  | Q14409   | 60559  | 0   | 0  |
| GLO1    | Lactoylglutathi  | Q04760   | 20764  | 0   | 0  |
| GLOD4   | Glyoxalase don   | I3L3Q4   | 25484  | 0   | 0  |
| GNA12   | Guanine nucle    | ε Q03113 | 44251  | 42  | 1  |
| GNAI2   | Guanine nucle    | ε P04899 | 40425  | 0   | 0  |
| GNAS    | Guanine nucle    | ε Q5JWF2 | 110956 | 42  | 1  |
| GNB1    | Guanine nucle    | ε B1AKQ8 | 12277  | 40  | 1  |
| GNB2    | Guanine nucle    | ε E7EP32 | 32388  | 0   | 0  |

|           |                                              |        |     |   |
|-----------|----------------------------------------------|--------|-----|---|
| GNB2L1    | Guanine nucleoside D6R909                    | 35055  | 84  | 2 |
| GNG12     | Guanine nucleoside Q9UBI6                    | 8001   | 0   | 0 |
| GNG5      | Guanine nucleoside P63218                    | 7314   | 0   | 0 |
| GNL3      | Guanine nucleoside Q9BVP2                    | 61954  | 0   | 0 |
| GNL3L     | Guanine nucleoside Q9NVN8                    | 65532  | 0   | 0 |
| GOT2      | Aspartate aminotransferase E7ERW2            | 47487  | 116 | 3 |
| GPI       | Glucose-6-phosphate K7EQ48                   | 53368  | 131 | 3 |
| GRM1      | Metabotropic glutamate receptor F8W805       | 101407 | 0   | 0 |
| GSDMA     | Gasdermin-A (mouse) J3KRG2                   | 49334  | 0   | 0 |
| GSTO1     | Glutathione S-transferase Q5TA02             | 23326  | 38  | 1 |
| GSTP1     | Glutathione S-transferase A8MX94             | 19468  | 0   | 0 |
| GTF2I     | General transcription factor P78347          | 112346 | 43  | 1 |
| GTF3C1    | General transcription factor Q12789          | 238725 | 0   | 0 |
| GTPBP4    | Nucleolar GTP-binding protein Q9BZE4         | 73918  | 0   | 0 |
| GXYLT1    | Glucosyltransferase xylogalacturonate Q4G148 | 50534  | 0   | 0 |
| H1FO      | Histone H1.0 core particle P07305            | 20850  | 0   | 0 |
| H1FX      | Histone H1x core particle Q92522             | 22474  | 0   | 0 |
| H2AFJ     | Histone H2A (mouse) FH0YFX9                  | 9970   | 0   | 0 |
| H2AFX     | Histone H2AX core particle P16104            | 15135  | 0   | 0 |
| H2AFY     | Core histone molecule O75367                 | 39592  | 0   | 0 |
| H2AFY2    | Core histone molecule Q9P0M6                 | 40033  | 0   | 0 |
| H2AFZ     | Histone H2A.Z core particle P0C0S5           | 13545  | 99  | 3 |
| H3F3A     | Histone H3 core particle OS B4DEB1           | 14044  | 8   | 0 |
| H3F3B     | Histone H3 (fruit fly) K7EK07                | 14905  | 0   | 0 |
| HADHB     | 3-ketoacyl-CoA synthetase B4E2W0             | 48848  | 0   | 0 |
| HBA2      | HCG1745306, integrin G3V1N2                  | 11940  | 0   | 0 |
| HBE1      | Hemoglobin subunit A8MUF7                    | 9464   | 0   | 0 |
| HCFC1     | HCF N-terminal domain A6NEM2                 | 213343 | 0   | 0 |
| HCK       | Tyrosine-protein kinase H0Y3C5               | 59473  | 0   | 0 |
| HDAC2     | Histone deacetylase B3KRS5                   | 51965  | 0   | 0 |
| HDAC4     | Histone deacetylase F5GX36                   | 72986  | 33  | 1 |
| HEATR1    | HEAT repeat-containing protein Q5T3Q7        | 233127 | 0   | 0 |
| HEXA      | Beta-hexosaminidase H3BP20                   | 61960  | 0   | 0 |
| HINT2     | Histidine triad domain Q9BX68                | 17151  | 0   | 0 |
| HIST1H1A  | Histone H1.1 core particle Q02539            | 21829  | 0   | 0 |
| HIST1H1C  | Histone H1.2 core particle P16403            | 21352  | 0   | 0 |
| HIST1H1D  | Histone H1.3 core particle P16402            | 22336  | 0   | 0 |
| HIST1H1E  | Histone H1.4 core particle P10412            | 21852  | 0   | 0 |
| HIST1H2AA | Histone H2A tyrosine phosphorylated Q96QV6   | 14225  | 0   | 0 |

|            |                        |        |     |    |
|------------|------------------------|--------|-----|----|
| HIST1H2AG  | Histone H2A ty P0C0S8  | 14083  | 228 | 7  |
| HIST1H2BJ  | Histone H2B ty P06899  | 13896  | 0   | 0  |
| HIST1H2BL  | Histone H2B ty Q99880  | 13944  | 0   | 0  |
| HIST1H2BN  | Histone H2B O U3KQK0   | 18792  | 142 | 4  |
| HIST1H4A   | Histone H4 OS P62805   | 11360  | 0   | 0  |
| HIST2H2AB  | Histone H2A ty Q8IUE6  | 13987  | 0   | 0  |
| HIST2H3PS2 | Histone H3 OS Q5TEC6   | 15421  | 0   | 0  |
| HIST3H2BB  | Histone H2B ty Q8N257  | 13900  | 0   | 0  |
| HMGA1      | High mobility g H7BYM6 | 34274  | 0   | 0  |
| HMGB1      | High mobility g Q5T7C4 | 18299  | 0   | 0  |
| HMGB1P1    | Putative high n B2RPK0 | 24223  | 34  | 1  |
| HMGB2      | High mobility g D6R9A6 | 15394  | 0   | 0  |
| HNRNPA0    | Heterogeneous Q13151   | 30822  | 99  | 8  |
| HNRNPA1    | Heterogeneous F8W6I7   | 33135  | 752 | 39 |
| HNRNPA2B1  | Heterogeneous P22626   | 37407  | 132 | 63 |
| HNRNPA3    | Heterogeneous P51991   | 39571  | 0   | 28 |
| HNRNPAB    | Heterogeneous D6R9P3   | 30284  | 0   | 0  |
| HNRNPC     | Heterogeneous G3V4C1   | 33550  | 391 | 10 |
| HNRNPD     | Heterogeneous Q14103   | 38410  | 763 | 22 |
| HNRNPDL    | Heterogeneous O14979   | 46409  | 57  | 11 |
| HNRNPF     | Heterogeneous P52597   | 45643  | 0   | 0  |
| HNRNPH1    | Heterogeneous D6RBM0   | 51197  | 279 | 30 |
| HNRNPH2    | Heterogeneous P55795   | 49232  | 0   | 2  |
| HNRNPH3    | Heterogeneous B4DHY1   | 36903  | 158 | 20 |
| HNRNPK     | Heterogeneous P61978   | 50944  | 642 | 15 |
| HNRNPL     | Heterogeneous P14866   | 64092  | 58  | 2  |
| HNRNPM     | Heterogeneous M0QZM1   | 77464  | 386 | 10 |
| HNRNPR     | Heterogeneous O43390   | 70899  | 553 | 12 |
| HNRNPU     | Heterogeneous Q00839   | 90528  | 224 | 7  |
| HNRNPUL1   | Heterogeneous B7Z4B8   | 95679  | 634 | 20 |
| HNRNPUL2   | Heterogeneous Q1KMD3   | 85052  | 636 | 15 |
| HP1BP3     | Heterochromat Q5SSJ5   | 61169  | 0   | 0  |
| HRNR       | Hornerin OS=F Q86YZ3   | 282228 | 0   | 0  |
| HSD17B10   | 3-hydroxyacyl- Q99714  | 26906  | 49  | 1  |
| HSD17B12   | Estradiol 17-be Q53GQ0 | 34302  | 162 | 4  |
| HSD17B4    | Hydroxysteroid G5E9S2  | 64552  | 220 | 4  |
| HSP90AA1   | Heat shock pro P07900  | 84607  | 292 | 6  |
| HSP90AB1   | Heat shock pro P08238  | 83212  | 0   | 0  |
| HSP90B1    | Endoplasmin OP14625    | 92411  | 197 | 3  |

|             |                           |        |      |    |
|-------------|---------------------------|--------|------|----|
| HSPA1A      | Heat shock 70 P08107      | 70009  | 0    | 1  |
| HSPA1L      | Heat shock 70 P34931      | 70331  | 0    | 3  |
| HSPA4       | Heat shock 70 P34932      | 94271  | 56   | 1  |
| HSPA5       | 78 kDa glucose P11021     | 72288  | 1097 | 21 |
| HSPA6       | Heat shock 70 P17066      | 70984  | 100  | 4  |
| HSPA8       | Heat shock co P11142      | 70854  | 815  | 22 |
| HSPA9       | Stress-70 prote P38646    | 73635  | 489  | 12 |
| HSPB1       | Heat shock pro F8WE04     | 20394  | 0    | 0  |
| HSPD1       | 60 kDa heat sh P10809     | 61016  | 303  | 5  |
| HSPE1       | 10 kDa heat sh P61604     | 10925  | 89   | 2  |
| HTRA1       | Serine proteas Q92743     | 51255  | 0    | 0  |
| IGHG2       | Ig gamma-2 ch P01859      | 35878  | 0    | 0  |
| IGLC2       | Ig lambda-2 ch P0CG05     | 11287  | 0    | 0  |
| IGLL5       | Immunoglobuli B9A064      | 23049  | 1    | 0  |
| IK          | Protein Red OS Q13123     | 65562  | 0    | 0  |
| ILF2        | Interleukin enh Q12905    | 43035  | 590  | 15 |
| ILF3        | Isoform 7 of Int Q12906-7 | 95748  | 1098 | 25 |
| IMMT        | Mitochondrial i B9A067    | 78925  | 0    | 0  |
| IMP3        | U3 small nucle Q9NV31     | 21837  | 0    | 0  |
| IMP4        | U3 small nucle H0Y714     | 31926  | 0    | 0  |
| INF2        | Inverted formir Q27J81    | 135540 | 0    | 0  |
| ING5        | Inhibitor of gro Q8WYH8   | 27733  | 0    | 0  |
| IQGAP2      | Ras GTPase-ac Q13576      | 180465 | 0    | 0  |
| IREB2       | Iron-responsiv P48200     | 104978 | 74   | 3  |
| IRS4        | Insulin recepto O14654    | 133685 | 0    | 0  |
| JUP         | Junction plako F5GWP8     | 81693  | 0    | 0  |
| KATNAL2     | Katanin p60 A1K7EIJ8      | 38097  | 51   | 1  |
| KBTBD3      | Kelch repeat a G3V161     | 60637  | 1    | 1  |
| KDEL1       | ER lumen prote P24390     | 24526  | 0    | 0  |
| KDEL2       | ER lumen prote H7BYF7     | 4124   | 0    | 0  |
| KHDRBS1     | KH domain-cor Q07666      | 48197  | 402  | 11 |
| KHSRP       | Far upstream e Q92945     | 73070  | 58   | 1  |
| KIAA0430    | Meiosis arrest G8JLP4     | 174865 | 0    | 0  |
| KIAA1429    | Protein virilizer Q69YN4  | 201898 | 0    | 0  |
| KLRC4-KLRK1 | Protein KLRC4 H3BQV0      | 17268  | 34   | 1  |
| KM-PA-2     | Ribosome biog Q96Q25      | 71885  | 0    | 0  |
| KPNA6       | Importin subun F5GYL8     | 60556  | 0    | 0  |
| KPNB1       | Importin subun Q14974     | 97108  | 0    | 0  |
| KPRP        | Keratinocyte pi Q5T749    | 64093  | 0    | 0  |

|           |                         |        |     |   |
|-----------|-------------------------|--------|-----|---|
| KTN1      | Kinectin OS=HQ86UP2     | 156179 | 0   | 0 |
| LAMA5     | Laminin subun O15230    | 399479 | 33  | 1 |
| LANCL1    | LanC-like prote E9PHS0  | 22028  | 50  | 1 |
| LAS1L     | Ribosomal bio Q9Y4W2    | 83013  | 0   | 0 |
| LBR       | Lamin-B recep Q14739    | 70658  | 0   | 0 |
| LCN1      | Lipocalin-1 OS P31025   | 19238  | 134 | 2 |
| LDHA      | L-lactate dehy F5GXY2   | 36665  | 107 | 3 |
| LDHAL6B   | L-lactate dehy Q9BYZ2   | 41916  | 0   | 0 |
| LDHB      | L-lactate dehy P07195   | 36615  | 131 | 3 |
| LEMD2     | LEM domain-c D6R958     | 5903   | 0   | 0 |
| LEPRE1    | Prolyl 3-hydrox Q32P28  | 83341  | 275 | 7 |
| LGALS3BP  | Galectin-3-bind Q08380  | 65289  | 0   | 0 |
| LGALS7    | Galectin-7 OS= P47929   | 15066  | 0   | 0 |
| LIG3      | DNA ligase 3 CP49916    | 112835 | 32  | 1 |
| LIMA1     | LIM domain an Q9UHB6    | 85173  | 14  | 1 |
| LIN7A     | Protein lin-7 h H0YI92  | 14130  | 0   | 0 |
| LINC00479 | Putative uncha Q96M42   | 15199  | 0   | 0 |
| LMNA      | Prelamin-A/C P02545     | 74095  | 149 | 3 |
| LMNB1     | Lamin-B1 OS= P20700     | 66368  | 461 | 9 |
| LMNB2     | Lamin B2, isofo J9JID7  | 69906  | 255 | 6 |
| LOC646903 | LOC646903 pro Q96EG4    | 15828  | 0   | 0 |
| LRMP      | Processed lym F5H006    | 50394  | 0   | 0 |
| LRPPRC    | Leucine-rich P B8ZZ38   | 56254  | 0   | 0 |
| LRRC59    | Leucine-rich re Q96AG4  | 34909  | 0   | 0 |
| LSM6      | U6 snRNA-ass P62312     | 9122   | 62  | 1 |
| LUC7L     | LUC7-like (S. c A8MYV2  | 32428  | 0   | 0 |
| LUC7L2    | Putative RNA-l Q9Y383   | 46486  | 77  | 2 |
| LUC7L3    | Cisplatin resist J3KPP4 | 58185  | 0   | 0 |
| LYAR      | Cell growth-reg Q9NX58  | 43588  | 0   | 0 |
| LYZ       | Lysozyme C O F8VV32     | 11481  | 0   | 0 |
| MAGEC1    | Melanoma-ass O60732     | 123568 | 0   | 0 |
| MAGOH     | Mago-nashi ho B1ARP8    | 12836  | 46  | 1 |
| MAGOHB    | Protein mago n Q96A72   | 17265  | 0   | 0 |
| MAGT1     | Magnesium tra Q9H0U3    | 38011  | 0   | 0 |
| MAP1A     | MAP1 light cha J3KPX8   | 305484 | 0   | 0 |
| MAP1B     | Microtubule-as P46821   | 270468 | 68  | 2 |
| MAP3K9    | Mitogen-activa G3V347   | 92769  | 0   | 0 |
| MAPKAPK2  | MAP kinase-ac P49137    | 45538  | 0   | 0 |
| MARS      | Methionine---tF H0YHV5  | 26681  | 0   | 0 |

|         |                         |        |     |    |
|---------|-------------------------|--------|-----|----|
| MATR3   | Matrin-3 OS=F A8MXP9    | 99905  | 588 | 12 |
| MBD3    | Methyl-CpG bin K7EIE8   | 26306  | 0   | 0  |
| MCM3    | DNA replication B4DWW4  | 95848  | 0   | 0  |
| MCM7    | DNA replication P33993  | 81257  | 0   | 0  |
| MCOLN3  | Mucolipin 3, iso B1ANB7 | 37219  | 0   | 0  |
| MCTS1   | Malignant T-cell Q9ULC4 | 20542  | 0   | 0  |
| MDC1    | Mediator of DN Q14676   | 226529 | 0   | 0  |
| MDH2    | Malate dehydro P40926   | 35481  | 237 | 4  |
| MDN1    | Midasin OS=H Q9NU22     | 632420 | 171 | 4  |
| MEN1    | Menin OS=Hor E7EN32     | 61381  | 0   | 0  |
| METTL3  | N6-adenosine- B4DTN4    | 27585  | 35  | 1  |
| MEX3A   | RNA-binding p A1L020    | 54139  | 0   | 0  |
| MFAP1   | Microfibrillar-a P55081 | 51927  | 0   | 0  |
| MGST1   | Microsomal gl F5H760    | 11886  | 0   | 0  |
| MGST2   | Microsomal gl Q99735    | 16610  | 0   | 0  |
| MGST3   | Microsomal gl Q5VV89    | 18405  | 0   | 0  |
| MLEC    | Malectin (Fragi H0YG07  | 19722  | 0   | 0  |
| MMTAG2  | Multiple myelo Q9BU76   | 29394  | 0   | 0  |
| MOGS    | Mannosyl-oligo Q13724   | 91861  | 0   | 0  |
| MOV10   | Mov10, Molone Q5JR04    | 107142 | 0   | 0  |
| MRE11A  | Double-strand B3KTC7    | 81020  | 0   | 0  |
| MRPL12  | 39S ribosomal P52815    | 21335  | 0   | 0  |
| MRPL22  | 39S ribosomal J3KQY1    | 26458  | 0   | 0  |
| MRPS15  | 28S ribosomal P82914    | 29823  | 0   | 0  |
| MRPS16  | 28S ribosomal B4E032    | 13820  | 0   | 0  |
| MRPS2   | 28S ribosomal Q5T8A0    | 30460  | 0   | 0  |
| MRPS31  | 28S ribosomal Q92665    | 45290  | 0   | 0  |
| MRT04   | mRNA turnover Q9UKD2    | 27543  | 0   | 0  |
| MSH2    | DNA mismatch P43246     | 104677 | 35  | 1  |
| MSH3    | DNA mismatch P20585     | 127332 | 0   | 0  |
| MSH6    | DNA mismatch B4DF41     | 137870 | 0   | 0  |
| MT-ATP6 | ATP synthase s P00846   | 24801  | 0   | 0  |
| MT-CO2  | Cytochrome c c P00403   | 25548  | 37  | 1  |
| MT-ND1  | NADH-ubiquin P03886     | 35637  | 0   | 0  |
| MTA1    | Metastasis-ass E7ESY4   | 79323  | 0   | 0  |
| MTA2    | Metastasis-ass Q94776   | 74976  | 0   | 0  |
| MTCH2   | Mitochondrial c E9PIE4  | 28644  | 0   | 0  |
| MTX2    | Metaxin 2 OS= Q8IZ68    | 28805  | 0   | 0  |
| MYADM   | Myeloid-associ C9J5M0   | 26222  | 0   | 0  |

|         |                        |        |     |    |
|---------|------------------------|--------|-----|----|
| MYBBP1A | Myb-binding p13L1L3    | 140155 | 0   | 0  |
| MYCBP   | C-Myc-binding Q99417   | 11959  | 0   | 0  |
| MYEF2   | Myelin express Q9P2K5  | 64081  | 42  | 1  |
| MYH10   | Myosin-10 OS= P35580   | 230635 | 0   | 0  |
| MYH11   | Myosin-11 OS= P35749   | 227199 | 0   | 0  |
| MYH14   | Myosin-14 OS= F2Z2U8   | 231075 | 0   | 0  |
| MYH7    | Myosin-7 OS=IP12883    | 222959 | 0   | 0  |
| MYH9    | Myosin-9 OS=IP35579    | 226392 | 0   | 0  |
| MYL12A  | Myosin regulat J3QRS3  | 20444  | 36  | 1  |
| MYL6    | Myosin light pc G3V1V0 | 18026  | 0   | 0  |
| MYO1B   | Unconventiona E9PDF6   | 128400 | 0   | 0  |
| MYO1C   | Unconventiona F5H6E2   | 118920 | 0   | 0  |
| MYO1D   | Unconventiona O94832   | 116129 | 0   | 0  |
| MYO6    | Unconventiona E7EW20   | 148742 | 0   | 0  |
| NACA    | Nascent polype H0YHX9  | 22930  | 0   | 0  |
| NAP1L1  | Nucleosome as H0YH88   | 21065  | 0   | 0  |
| NAT10   | N-acetyltransfe Q9H0A0 | 115657 | 0   | 0  |
| NAT14   | N-acetyltransfe M0R1E3 | 17831  | 0   | 0  |
| NBAS    | Neuroblastomε H0Y5G7   | 160425 | 0   | 0  |
| NCAPD3  | Condensin-2 cα P42695  | 168783 | 0   | 0  |
| NCBP1   | Nuclear cap-bi Q09161  | 91781  | 0   | 0  |
| NCCRP1  | F-box only prot Q6ZVX7 | 30828  | 0   | 0  |
| NCL     | Nucleolin OS=IP19338   | 76568  | 975 | 17 |
| NCOA5   | Nuclear recept Q9HCD5  | 65496  | 0   | 0  |
| NDUFA12 | NADH dehydro H0YID5    | 6148   | 0   | 0  |
| NDUFA13 | NADH dehydro J3KN00    | 25804  | 0   | 0  |
| NDUFA2  | NADH dehydro O43678    | 10915  | 0   | 0  |
| NDUFA4  | NADH dehydro O00483    | 9364   | 0   | 0  |
| NDUFA6  | NADH dehydro R4GN43    | 8504   | 0   | 0  |
| NDUFS2  | NADH dehydro B7Z9L2    | 26953  | 0   | 0  |
| NDUFS3  | NADH dehydro O75489    | 30223  | 93  | 1  |
| NDUFS7  | NADH dehydro B3KRI2    | 22188  | 0   | 0  |
| NDUFS8  | NADH dehydro F8W9K7    | 13844  | 0   | 0  |
| NDUFV1  | NADH dehydro G3V0I5    | 50022  | 0   | 0  |
| NDUFV2  | NADH dehydro E7EPT4    | 27889  | 0   | 0  |
| NEK10   | Serine/threonin Q6ZWH5 | 133176 | 0   | 0  |
| NHP2    | H/ACA ribonuc Q9NX24   | 17190  | 0   | 0  |
| NHP2L1  | NHP2-like prot P55769  | 14165  | 57  | 1  |
| NIFK    | MKI67 FHA do Q9BYG3    | 34201  | 0   | 0  |



|           |                          |        |     |    |
|-----------|--------------------------|--------|-----|----|
| NIP7      | 60S ribosome ε J3QLW7    | 12445  | 0   | 0  |
| NIPBL     | Nipped-B-like   Q6KC79   | 315854 | 0   | 0  |
| NKRF      | NF-kappa-B-ε O15226      | 77624  | 123 | 2  |
| NLE1      | Notchless prot K7ERN7    | 13709  | 0   | 0  |
| NLRC3     | Protein NLRC3 B5MDB6     | 111493 | 0   | 0  |
| NME1      | Nucleoside dip P15531    | 17138  | 0   | 0  |
| NME1-NME2 | Nucleoside dip Q32Q12    | 32621  | 142 | 4  |
| NME2      | Nucleoside dip P22392    | 17287  | 0   | 0  |
| NME3      | Nucleoside dip Q13232    | 19003  | 30  | 1  |
| NME4      | Nucleoside dip F2Z2X0    | 25444  | 0   | 0  |
| NMNAT1    | Nicotinamide n B1AN62    | 18299  | 0   | 0  |
| NO66      | Bifunctional lys Q9H6W3  | 71041  | 0   | 0  |
| NOC2L     | Nucleolar com   Q9Y3T9   | 84866  | 0   | 0  |
| NOC3L     | Nucleolar com   F5H677   | 57315  | 0   | 0  |
| NOC4L     | Nucleolar com   Q9BVI4   | 58431  | 0   | 0  |
| NOL11     | Nucleolar prote Q9H8H0   | 81072  | 0   | 0  |
| NOL6      | Nucleolar prote G8JLK7   | 121957 | 0   | 0  |
| NOLC1     | Nucleolar and ε S4R341   | 8046   | 0   | 0  |
| NONO      | Non-POU dom Q15233       | 54197  | 111 | 5  |
| NOP16     | Nucleolar prote D6RIC3   | 17187  | 0   | 0  |
| NOP2      | Putative riboso P46087   | 89247  | 0   | 0  |
| NOP56     | Nucleolar prote O00567   | 66009  | 0   | 0  |
| NOP58     | Nucleolar prote Q9Y2X3   | 59541  | 0   | 0  |
| NOVA2     | RNA-binding p Q9UNW9     | 48979  | 0   | 0  |
| NPM1      | Nucleophosmir P06748     | 32555  | 249 | 6  |
| NPM3      | Nucleoplasmin O75607     | 19331  | 0   | 0  |
| NR2F1     | COUP transcrip P10589    | 46126  | 0   | 0  |
| NSDHL     | Sterol-4-alpha C9JDR0    | 28128  | 0   | 0  |
| NUDT16L1  | Protein syndes Q9BRJ7    | 23323  | 91  | 3  |
| NUDT21    | Cleavage and p O43809    | 26211  | 662 | 12 |
| NUMA1     | Isoform 2 of Nu Q14980-2 | 236372 | 0   | 0  |
| NUP107    | Nuclear pore c B4DZ67    | 103109 | 0   | 0  |
| NUP133    | Nuclear pore c F5H5C2    | 127262 | 0   | 0  |
| NUP153    | Nuclear pore c F6QR24    | 157240 | 0   | 0  |
| NUP155    | Nuclear pore c E9PF10    | 148000 | 0   | 0  |
| NUP160    | Nuclear pore c G3V198    | 140198 | 0   | 0  |
| NUP188    | Nucleoporin N Q5SRE5     | 195917 | 0   | 0  |
| NUP205    | Nuclear pore c Q92621    | 227776 | 0   | 0  |
| NUP210    | Nuclear pore n Q8TEM1    | 204983 | 71  | 2  |

|         |                  |         |        |     |    |
|---------|------------------|---------|--------|-----|----|
| NUP214  | Nuclear pore c   | P35658  | 213488 | 0   | 0  |
| NUP35   | Nucleoporin N    | B4DP57  | 21129  | 0   | 0  |
| NUP37   | Nucleoporin N    | Q8NFH4  | 36684  | 0   | 0  |
| NUP43   | Nucleoporin N    | Q8NFH3  | 42124  | 0   | 0  |
| NUP85   | Nuclear pore c   | J3KT10  | 70133  | 0   | 0  |
| NUP93   | Nuclear pore c   | H3BVG0  | 99492  | 0   | 0  |
| NUP98   | Nuclear pore c   | J3KP29  | 177290 | 0   | 0  |
| NUPL1   | Nucleoporin p    | 5Q5JRG1 | 49065  | 0   | 0  |
| NXF1    | Nuclear RNA e    | Q9UBU9  | 70139  | 0   | 0  |
| OLA1    | Obg-like ATPa    | J3KQ32  | 46908  | 0   | 0  |
| ORC4    | Origin recogniti | O43929  | 50345  | 0   | 0  |
| ORC5    | Origin recogniti | O43913  | 50251  | 0   | 0  |
| OSBPL8  | Oxysterol-bindi  | F8VQX7  | 81606  | 0   | 0  |
| OTUD4   | OTU domain c     | G3V0I6  | 123968 | 0   | 0  |
| P4HB    | Protein disulfid | P07237  | 57081  | 266 | 8  |
| PA2G4   | Proliferation-a  | Q9UQ80  | 43759  | 93  | 2  |
| PABPC1  | Polyadenylate-   | E7ERJ7  | 67096  | 33  | 1  |
| PABPC4  | Poly(A) binding  | B1ANR0  | 67928  | 0   | 0  |
| PABPN1  | Polyadenylate-   | G3V4T2  | 20230  | 38  | 1  |
| PAK1IP1 | p21-activated    | JQ9NWT1 | 43936  | 0   | 0  |
| PARK7   | Protein DJ-1 O   | K7ELW0  | 17898  | 0   | 0  |
| PARP1   | Poly [ADP-ribo   | P09874  | 113012 | 73  | 1  |
| PARP10  | Poly [ADP-ribo   | E9PK67  | 109029 | 0   | 0  |
| PAXBP1  | PAX3- and PA     | Q9Y5B6  | 104739 | 0   | 0  |
| PBRM1   | Protein polybrc  | H0Y5B5  | 126213 | 0   | 0  |
| PCBP1   | Poly(rC)-bindi   | Q15365  | 37474  | 30  | 0  |
| PCBP2   | Poly(RC) bindi   | G3V0E8  | 33475  | 0   | 0  |
| PCID2   | PCI domain-co    | Q5JVF3  | 46000  | 0   | 0  |
| PCMT1   | Protein-L-isoa   | J3KP72  | 30296  | 28  | 0  |
| PCNP    | PEST proteolyt   | Q8WW12  | 18913  | 433 | 12 |
| PDCD11  | Protein RRP5     | JQ14690 | 208570 | 0   | 0  |
| PDCD6   | Programmed c     | O75340  | 21855  | 0   | 0  |
| PDIA3   | Protein disulfid | G5EA52  | 54929  | 341 | 7  |
| PDIA4   | Protein disulfid | P13667  | 72887  | 32  | 0  |
| PDIA6   | Protein disulfid | B5MCQ5  | 53228  | 0   | 0  |
| PDS5A   | Sister chromati  | Q29RF7  | 150734 | 0   | 0  |
| PDS5B   | Sister chromati  | Q9NTI5  | 164563 | 0   | 0  |
| PEBP1   | Phosphatidylet   | P30086  | 21044  | 0   | 0  |
| PELP1   | Proline-, glutar | I3L3A8  | 124865 | 31  | 1  |

|         |                        |        |     |   |
|---------|------------------------|--------|-----|---|
| PES1    | Pescadillo hom B5MCF9  | 66036  | 0   | 0 |
| PEX6    | Peroxin Pex6p Q8WYQ0   | 77694  | 0   | 0 |
| PFKFB3  | 6-phosphofruc H0Y483   | 16566  | 0   | 0 |
| PFKP    | 6-phosphofruc B1APP6   | 26054  | 34  | 1 |
| PFN1    | Profilin-1 OS=IP07737  | 17506  | 37  | 0 |
| PGAM1   | Phosphoglycer P18669   | 28786  | 38  | 1 |
| PGK1    | Phosphoglycer B7Z7A9   | 41402  | 133 | 3 |
| PGRMC1  | Membrane-ass B7Z1L3    | 15869  | 0   | 0 |
| PHB     | Prohibitin (Fra E7ESE2 | 22385  | 189 | 4 |
| PHB2    | Prohibitin-2 OSJ3KPX7  | 33382  | 272 | 6 |
| PHF5A   | PHD finger-like Q7RTV0 | 12397  | 78  | 9 |
| PHGDH   | D-3-phosphogl Q5SZU1   | 53051  | 136 | 3 |
| PHIP    | PH-interacting Q8WWQ0  | 206560 | 0   | 0 |
| PIN4    | Peptidyl-prolyl H0Y4T6 | 9537   | 0   | 0 |
| PIP     | Prolactin-induc P12273 | 16562  | 0   | 0 |
| PKM     | Pyruvate kinas H3BQ34  | 30701  | 0   | 0 |
| PKP1    | Plakophilin-1 C Q13835 | 82808  | 0   | 0 |
| PLA2G4B | Cytosolic phos P0C869  | 87922  | 0   | 0 |
| PLEC    | Plectin OS=Ho Q15149   | 531466 | 0   | 0 |
| PLOD1   | Procollagen-lys B4DR87 | 88217  | 246 | 5 |
| PLRG1   | Pleiotropic reg A8MW61 | 57146  | 0   | 0 |
| PNN     | Pinin OS=Hom Q9H307    | 81565  | 0   | 0 |
| POGZ    | Pogo transpos Q7Z3K3   | 155245 | 0   | 0 |
| POLDIP3 | Polymerase de B4DMM2   | 20211  | 0   | 0 |
| POLG2   | DNA polymera J3KRM2    | 17673  | 0   | 0 |
| POLR2A  | DNA-directed P24928    | 217039 | 125 | 3 |
| POLR2C  | DNA-directed P19387    | 31422  | 0   | 0 |
| POLR2E  | DNA-directed P19388    | 24536  | 0   | 0 |
| POLR2G  | DNA-directed P62487    | 19282  | 0   | 0 |
| POLR2K  | DNA-directed P53803    | 6999   | 0   | 0 |
| PPA1    | Inorganic pyro Q5SQT6  | 19969  | 0   | 0 |
| PPA2    | Inorganic pyro H0Y9D8  | 25619  | 0   | 0 |
| PPIA    | Peptidyl-prolyl P62937 | 18001  | 157 | 4 |
| PPIB    | Peptidyl-prolyl P23284 | 23728  | 72  | 0 |
| PPIF    | Peptidyl-prolyl P30405 | 22026  | 163 | 4 |
| PPIH    | Peptidyl-prolyl C9JQD4 | 15790  | 0   | 0 |
| PPIL1   | Peptidyl-prolyl Q9Y3C6 | 18225  | 0   | 0 |
| PPIL3   | Peptidyl-prolyl H7BZ14 | 20259  | 0   | 0 |
| PPP1CA  | Serine/threonin E9PMD7 | 28879  | 0   | 0 |

|         |                              |        |      |    |
|---------|------------------------------|--------|------|----|
| PPP1CB  | Serine/threonine P62140      | 37163  | 0    | 0  |
| PPP1CC  | Serine/threonine F8VYE8      | 34927  | 0    | 0  |
| PPP1R9B | Neurabin-2 OS Q96SB3         | 89138  | 0    | 0  |
| PPP2CB  | Serine/threonine H0YBN9      | 6093   | 32   | 1  |
| PPP2R1A | Serine/threonine B3KQV6      | 45575  | 0    | 0  |
| PPP6R2  | Serine/threonine T1ECW5      | 72922  | 32   | 1  |
| PQBP1   | Polyglutamine- H7C053        | 16556  | 0    | 0  |
| PRAF2   | PRA1 family protein A6NP52   | 17177  | 56   | 1  |
| PRC1    | Protein regulator H0YL53     | 23061  | 5    | 3  |
| PRDX1   | Peroxiredoxin-1 Q06830       | 22096  | 0    | 0  |
| PRDX2   | Peroxiredoxin-1 P32119       | 21878  | 13   | 1  |
| PRDX3   | Thioredoxin-dependent E9PH29 | 25822  | 1    | 0  |
| PRDX4   | Peroxiredoxin-1 Q13162       | 30521  | 163  | 4  |
| PRDX6   | Peroxiredoxin-1 P30041       | 25019  | 48   | 1  |
| PRKCSH  | Glucosidase 2-like K7ELL7    | 60154  | 77   | 1  |
| PRKDC   | DNA-dependent P78527         | 468788 | 753  | 16 |
| PRMT5   | Protein arginine G3V5W5      | 67631  | 85   | 2  |
| PRPF19  | Pre-mRNA-protein Q9UMS4      | 55146  | 171  | 4  |
| PRPF3   | U4/U6 small nuclear B4DSY9   | 31869  | 30   | 1  |
| PRPF31  | U4/U6 small nuclear E7EN72   | 55421  | 0    | 0  |
| PRPF39  | Pre-mRNA-protein Q86UA1      | 78381  | 15   | 0  |
| PRPF4   | U4/U6 small nuclear O43172   | 58412  | 0    | 0  |
| PRPF40A | Pre-mRNA-protein O75400      | 108737 | 0    | 0  |
| PRPF6   | Pre-mRNA-protein O94906      | 106858 | 48   | 1  |
| PRPF8   | Pre-mRNA-protein Q6P2Q9      | 273427 | 1858 | 42 |
| PRSS3   | Trypsin-3 (Frag B1AN99       | 19389  | 0    | 0  |
| PRSS33  | Serine protease I3L3D7       | 25382  | 0    | 0  |
| PSAP    | Saposin-D OS= B1AVU8         | 61652  | 0    | 0  |
| PSIP1   | PC4 and SFRS1 O75475         | 60067  | 0    | 0  |
| PSMA1   | Proteasome subunit F5GX11    | 26488  | 31   | 1  |
| PSMA3   | Proteasome subunit P25788    | 28415  | 82   | 1  |
| PSMA4   | Proteasome subunit H0YL69    | 26360  | 0    | 0  |
| PSMB5   | Proteasome subunit H0YJM8    | 28462  | 115  | 2  |
| PSMB6   | Proteasome subunit P28072    | 25341  | 0    | 0  |
| PSMB7   | Proteasome subunit Q99436    | 29946  | 0    | 0  |
| PSPC1   | Paraspeckle component Q8WXF1 | 58706  | 0    | 0  |
| PTBP1   | Polypyrimidine P26599        | 57186  | 183  | 4  |
| PTBP2   | Polypyrimidine B4DSS8        | 59583  | 0    | 0  |
| PTGES3  | Prostaglandin IB4DDC6        | 14563  | 0    | 0  |

|         |                                          |        |      |    |
|---------|------------------------------------------|--------|------|----|
| PTMA    | Thymosin alpha; H7C2N1                   | 15849  | 52   | 1  |
| PTPLAD1 | Very-long-chain B4DRF4                   | 36407  | 0    | 0  |
| PTPN13  | Tyrosine-protein Q12923                  | 276733 | 0    | 0  |
| PUF60   | Poly(U)-binding Q9UHX1                   | 59838  | 0    | 0  |
| PWP2    | Periodic protein Q15269                  | 102387 | 0    | 0  |
| RAB10   | Ras-related protein P61026               | 22527  | 142  | 3  |
| RAB15   | Ras-related protein P59190               | 24375  | 91   | 2  |
| RAB33B  | Ras-related protein Q9H082               | 25701  | 31   | 1  |
| RAB35   | Ras-related protein F5H157               | 21201  | 91   | 2  |
| RAB4B   | HCG1995540, isoform Q6PIK3               | 13528  | 0    | 0  |
| RAB5C   | Ras-related protein P51148               | 23468  | 126  | 2  |
| RAB6A   | Ras-related protein H0YGL6               | 22746  | 31   | 1  |
| RAB7A   | Ras-related protein C9IZZ0               | 13067  | 0    | 0  |
| RAB8B   | Ras-related protein H0YMN7               | 10478  | 0    | 0  |
| RAC2    | Ras-related C3B1AH77                     | 16765  | 0    | 0  |
| RAD50   | DNA repair protein Q92878                | 153797 | 85   | 2  |
| RAD52   | Isoform beta of P43351-2                 | 24524  | 0    | 0  |
| RAE1    | mRNA export factor E9PQ57                | 47801  | 0    | 0  |
| RALY    | RNA-binding protein Q5QPL9               | 24650  | 125  | 3  |
| RAN     | GTP-binding nucleotide J3KQE5            | 26799  | 94   | 3  |
| RANBP1  | Ran-specific GTPase P43487               | 23296  | 0    | 0  |
| RANBP2  | E3 SUMO-protein P49792                   | 357974 | 0    | 0  |
| RANGAP1 | Ran GTPase-activator H0Y4Q3              | 26891  | 0    | 0  |
| RAP1B   | Ras-related protein F5GX62               | 15737  | 34   | 1  |
| RAPGEF3 | Rap guanine nucleotide F8VRX1            | 92093  | 0    | 0  |
| RAPH1   | Ras association domain C9K0J5            | 141091 | 0    | 0  |
| RB1CC1  | RB1-inducible coiled-coil Q8TDY2         | 182975 | 0    | 0  |
| RBBP4   | Histone-binding protein Q09028           | 47626  | 121  | 3  |
| RBBP5   | Retinoblastoma-associated protein Q15291 | 59116  | 0    | 0  |
| RBBP7   | Histone-binding protein E9PC52           | 46909  | 0    | 0  |
| RBM10   | RNA-binding protein P98175               | 103469 | 990  | 26 |
| RBM12B  | RNA-binding protein B9ZVT1               | 102641 | 0    | 0  |
| RBM14   | RNA-binding protein Q96PK6               | 69449  | 405  | 9  |
| RBM15   | Putative RNA-binding protein Q96T37      | 107124 | 52   | 1  |
| RBM17   | Splicing factor Q96I25                   | 44934  | 1140 | 36 |
| RBM20   | RNA-binding protein Q5T481               | 134274 | 0    | 0  |
| RBM25   | RNA-binding protein P49756               | 100124 | 0    | 0  |
| RBM3    | Putative RNA-binding protein P98179      | 17160  | 0    | 0  |
| RBM39   | RNA-binding protein E1P5S2               | 40516  | 92   | 2  |

|        |                         |        |      |    |
|--------|-------------------------|--------|------|----|
| RBM4   | RNA-binding p E9PB51    | 26270  | 0    | 0  |
| RBM45  | RNA-binding p Q8IUH3    | 53469  | 0    | 0  |
| RBM5   | RNA-binding p P52756    | 92097  | 1226 | 27 |
| RBM6   | RNA-binding p P78332    | 128565 | 410  | 10 |
| RBM8A  | RNA-binding p Q9Y5S9    | 19877  | 76   | 1  |
| RBMX   | RNA-binding r P38159    | 42306  | 563  | 17 |
| RBMXL1 | RNA binding m Q96E39    | 42116  | 237  | 6  |
| RBP3   | Retinol-binding P10745  | 135278 | 30   | 1  |
| RCC1   | Regulator of ch C9JW69  | 39559  | 31   | 0  |
| RCC2   | Protein RCC2 C Q9P258   | 56049  | 40   | 1  |
| RCL1   | RNA 3'-terminal Q9Y2P8  | 40817  | 0    | 0  |
| RCN1   | Reticulocalbin- Q15293  | 38866  | 0    | 0  |
| RCN2   | Reticulocalbin- F8WCY5  | 39115  | 0    | 0  |
| RCOR3  | REST corepres B4DV59    | 41776  | 0    | 0  |
| RECQL  | ATP-dependent P46063    | 73410  | 40   | 1  |
| RER1   | Protein RER1 C Q5T091   | 21011  | 0    | 0  |
| RFC1   | Replication fac P35251  | 128175 | 0    | 0  |
| RFC2   | Replication fac P35250  | 39132  | 0    | 0  |
| RFC3   | Replication fac P40938  | 40530  | 0    | 0  |
| RFC4   | Replication fac C9JZI1  | 36854  | 0    | 0  |
| RFC5   | Replication fac F8W9B4  | 28828  | 0    | 0  |
| RGPD1  | RANBP2-like a P0DJD0    | 196539 | 57   | 1  |
| RGPD3  | RanBP2-like ar J3KNE0   | 198270 | 0    | 0  |
| RHCE   | Blood group R H0YCI8    | 8389   | 34   | 1  |
| RIF1   | Telomere-asso Q5UIP0    | 274294 | 0    | 0  |
| RNPS1  | RNA-binding p H3BMM9    | 31681  | 0    | 0  |
| ROCK2  | Rho-associated C D6REE7 | 50695  | 0    | 0  |
| RP1    | Oxygen-regulat P56715   | 240511 | 33   | 1  |
| RPA1   | Replication pro I3L2M5  | 16262  | 0    | 0  |
| RPA2   | Replication pro Q5TEJ7  | 19421  | 0    | 0  |
| RPA3   | Replication pro B5MC59  | 9165   | 0    | 0  |
| RPF2   | Ribosome prod Q9H7B2    | 35560  | 0    | 0  |
| RPL10  | 60S ribosomal F8W7C6    | 18580  | 0    | 0  |
| RPL10A | 60S ribosomal P62906    | 24816  | 40   | 1  |
| RPL11  | 60S ribosomal P62913    | 20240  | 65   | 1  |
| RPL12  | 60S ribosomal P30050    | 17808  | 79   | 2  |
| RPL13  | 60S ribosomal P26373    | 24247  | 0    | 0  |
| RPL13A | 60S ribosomal M0QYS1    | 24201  | 0    | 0  |
| RPL14  | 60S ribosomal E7EPB3    | 14549  | 0    | 0  |

|         |                         |       |     |   |
|---------|-------------------------|-------|-----|---|
| RPL15   | 60S ribosomal P61313    | 24131 | 0   | 0 |
| RPL17   | 60S ribosomal J3KRX5    | 20158 | 0   | 0 |
| RPL18   | 60S ribosomal H0YHA7    | 18962 | 0   | 0 |
| RPL18A  | 60S ribosomal M0R117    | 18067 | 0   | 0 |
| RPL19   | Ribosomal protJ3KTE4    | 23233 | 0   | 0 |
| RPL21   | 60S ribosomal P46778    | 18553 | 0   | 0 |
| RPL22   | 60S ribosomal K7ERI7    | 11162 | 6   | 0 |
| RPL23   | 60S ribosomal P62829    | 14856 | 85  | 2 |
| RPL23A  | 60S ribosomal P62750    | 17792 | 67  | 1 |
| RPL24   | 60S ribosomal C9JNW5    | 17532 | 0   | 0 |
| RPL26   | 60S ribosomal P61254    | 17248 | 0   | 0 |
| RPL26L1 | 60S ribosomal E5RIT6    | 15197 | 0   | 0 |
| RPL27   | 60S ribosomal P61353    | 15788 | 0   | 0 |
| RPL27A  | 60S ribosomal E9PLL6    | 12194 | 0   | 0 |
| RPL28   | 60S ribosomal P46779    | 15738 | 0   | 0 |
| RPL3    | 60S ribosomal P39023    | 46080 | 0   | 0 |
| RPL30   | 60S ribosomal E5RI99    | 12648 | 0   | 0 |
| RPL31   | 60S ribosomal B7Z4C8    | 15109 | 42  | 1 |
| RPL34   | 60S ribosomal P49207    | 13284 | 0   | 0 |
| RPL35   | 60S ribosomal F2Z388    | 10638 | 0   | 0 |
| RPL35A  | 60S ribosomal P18077    | 12530 | 35  | 1 |
| RPL36A  | 60S ribosomal H0Y5B4    | 15291 | 0   | 0 |
| RPL37A  | 60S ribosomal P61513    | 10268 | 0   | 0 |
| RPL38   | 60S ribosomal J3KT73    | 7560  | 41  | 1 |
| RPL4    | 60S ribosomal P36578    | 47667 | 0   | 0 |
| RPL5    | 60S ribosomal P46777    | 34341 | 0   | 0 |
| RPL6    | 60S ribosomal Q02878    | 32708 | 0   | 0 |
| RPL7    | 60S ribosomal P18124    | 29207 | 0   | 0 |
| RPL7A   | 60S ribosomal P62424    | 29977 | 0   | 0 |
| RPL7L1  | 60S ribosomal R4GMU7    | 22732 | 0   | 0 |
| RPL8    | 60S ribosomal P62917    | 28007 | 0   | 0 |
| RPL9    | 60S ribosomal H0Y9R4    | 10150 | 0   | 0 |
| RPLP0   | 60S acidic ribo: P05388 | 34252 | 107 | 2 |
| RPLP1   | 60S acidic ribo: P05386 | 11507 | 30  | 1 |
| RPLP2   | 60S acidic ribo: H0YDD8 | 11658 | 137 | 3 |
| RPN1    | Dolichyl-dipho: P04843  | 68527 | 36  | 1 |
| RPN2    | Dolichyl-dipho: P04844  | 69241 | 0   | 0 |
| RPP40   | Ribonuclease F O75818   | 41807 | 0   | 0 |
| RPS10   | 40S ribosomal P46783    | 18886 | 14  | 0 |

|                     |                       |        |     |   |
|---------------------|-----------------------|--------|-----|---|
| RPS10-NUDT3 Protein | RPS10·S4R435          | 32576  | 0   | 0 |
| RPS11               | 40S ribosomal P62280  | 18419  | 75  | 2 |
| RPS12               | 40S ribosomal P25398  | 14505  | 0   | 0 |
| RPS13               | 40S ribosomal P62277  | 17212  | 0   | 0 |
| RPS14               | 40S ribosomal P62263  | 16263  | 51  | 1 |
| RPS15               | 40S ribosomal K7ELC2  | 17712  | 0   | 0 |
| RPS15A              | 40S ribosomal P62244  | 14830  | 81  | 2 |
| RPS16               | 40S ribosomal M0R210  | 14410  | 93  | 2 |
| RPS17               | 40S ribosomal H0YK46  | 21629  | 73  | 2 |
| RPS18               | 40S ribosomal P62269  | 17708  | 141 | 2 |
| RPS19               | 40S ribosomal M0QXK4  | 16051  | 195 | 4 |
| RPS2                | 40S ribosomal H0YEN5  | 21140  | 0   | 0 |
| RPS20               | 40S ribosomal P60866  | 13364  | 39  | 1 |
| RPS23               | 40S ribosomal P62266  | 15798  | 0   | 0 |
| RPS24               | 40S ribosomal E7ETK0  | 15187  | 0   | 0 |
| RPS25               | 40S ribosomal P62851  | 13734  | 92  | 2 |
| RPS26               | 40S ribosomal P62854  | 13007  | 0   | 0 |
| RPS27               | 40S ribosomal Q5T4L4  | 7352   | 0   | 0 |
| RPS28               | 40S ribosomal P62857  | 7836   | 23  | 0 |
| RPS29               | 40S ribosomal P62273  | 6672   | 0   | 0 |
| RPS3                | 40S ribosomal P23396  | 26671  | 181 | 2 |
| RPS3A               | 40S ribosomal D6RG13  | 25591  | 0   | 0 |
| RPS4X               | 40S ribosomal P62701  | 29579  | 122 | 3 |
| RPS5                | 40S ribosomal M0QZN2  | 14754  | 88  | 1 |
| RPS6                | 40S ribosomal P62753  | 28663  | 0   | 0 |
| RPS7                | 40S ribosomal P62081  | 22113  | 86  | 2 |
| RPS8                | 40S ribosomal Q5JR95  | 21866  | 0   | 0 |
| RPS9                | 40S ribosomal P46781  | 22578  | 0   | 0 |
| RPSA                | 40S ribosomal C9J9K3  | 29487  | 0   | 0 |
| RPSAP58             | 40S ribosomal A6NE09  | 32888  | 48  | 1 |
| RRNAD1              | Protein RRNAC Q4VX71  | 29655  | 0   | 0 |
| RRP1                | Ribosomal RN/P56182   | 52807  | 0   | 0 |
| RRP12               | RRP12-like pro F5H456 | 112965 | 0   | 0 |
| RRP1B               | Ribosomal RN/Q14684   | 84375  | 0   | 0 |
| RRP9                | U3 small nucle O43818 | 51809  | 0   | 0 |
| RTCB                | tRNA-splicing IQ9Y3I0 | 55175  | 329 | 7 |
| RTN1                | Reticulon OS=IA8MT72  | 21848  | 38  | 2 |
| RTN3                | Reticulon-3 OSO95197  | 112541 | 78  | 3 |
| RTN4                | Reticulon OS=IF8W914  | 37121  | 0   | 0 |



|          |                                |        |      |    |
|----------|--------------------------------|--------|------|----|
| RUFY2    | RUN and FYVE H0YD93            | 71390  | 4    | 1  |
| RUVBL1   | RuvB-like 1 OS Q9Y265          | 50196  | 99   | 2  |
| RUVBL2   | RuvB-like 2 OS Q9Y230          | 51125  | 0    | 0  |
| RYR1     | Ryanodine receptor P21817      | 564815 | 0    | 0  |
| S100A14  | Protein S100-A Q9HCY8          | 11655  | 0    | 0  |
| S100A6   | Protein S100-AR4GN98           | 9675   | 0    | 0  |
| S100A7   | Protein S100-AP31151           | 11464  | 0    | 0  |
| S100A8   | Protein S100-AP05109           | 10828  | 79   | 2  |
| SAFB     | Scaffold attachment Q15424     | 102580 | 660  | 17 |
| SAFB2    | Scaffold attachment Q14151     | 107408 | 0    | 0  |
| SAMM50   | Sorting and assembly A8MZI2    | 28477  | 0    | 2  |
| SAP18    | Histone deacetylase O00422     | 17550  | 48   | 2  |
| SAP30BP  | SAP30-binding J3QQJ0           | 35862  | 0    | 0  |
| SART1    | U4/U6.U5 tri-snRNP O43290      | 90200  | 0    | 0  |
| SATB2    | DNA-binding protein Q3ZB87     | 69094  | 0    | 0  |
| SCAMP1   | Secretory carrier U3KQ30       | 37849  | 77   | 2  |
| SCGB1D2  | Secretoglobin family O95969    | 9918   | 0    | 0  |
| SCP2     | Non-specific lipid P22307      | 58956  | 0    | 0  |
| SDHA     | Succinate dehydrogenase H0Y8X1 | 13628  | 0    | 0  |
| SEC11A   | SEC11-like 1 (human) H0YK72    | 18976  | 0    | 0  |
| SEC22B   | Vesicle-trafficking O75396     | 24578  | 89   | 2  |
| SEC23A   | Protein translocator B3KXI2    | 63061  | 0    | 0  |
| SEC61A2  | Protein translocator F2Z2C7    | 17860  | 0    | 0  |
| SEC61B   | Protein translocator S4R3B5    | 4871   | 0    | 0  |
| SEC63    | Translocation protein Q9UGP8   | 87942  | 0    | 0  |
| SEH1L    | Nucleoporin SEK7ELV2           | 29522  | 0    | 0  |
| SEL1L    | Protein sel-1 homolog Q9UBV2   | 88698  | 0    | 0  |
| 2-Sep    | Septin-2 OS=H B5MCX3           | 36917  | 0    | 0  |
| SERPINB4 | Serpin B4 (Frag) H0Y5H9        | 42472  | 0    | 0  |
| SET      | Protein SET OS Q01105          | 33469  | 142  | 2  |
| SF1      | Splicing factor H7C0N4         | 80569  | 1158 | 28 |
| SF3A1    | Splicing factor Q15459         | 88831  | 1062 | 42 |
| SF3A2    | Splicing factor K7EMT0         | 49224  | 606  | 15 |
| SF3A3    | Splicing factor Q12874         | 58812  | 1066 | 34 |
| SF3B1    | Splicing factor O75533         | 145738 | 2543 | 89 |
| SF3B14   | Pre-mRNA branch point Q9Y3B4   | 14576  | 108  | 23 |
| SF3B2    | Splicing factor Q13435         | 100165 | 1949 | 69 |
| SF3B3    | Splicing factor I3L4G7         | 135492 | 1830 | 64 |
| SF3B4    | Splicing factor Q15427         | 44357  | 237  | 7  |

|          |                         |        |     |   |
|----------|-------------------------|--------|-----|---|
| SF3B5    | Splicing factor Q9BWJ5  | 10129  | 127 | 7 |
| SFI1     | Protein SFI1 h D3YTJ2   | 128933 | 0   | 0 |
| SFN      | 14-3-3 protein P31947   | 27757  | 0   | 0 |
| SFPQ     | Splicing factor, P23246 | 76102  | 0   | 0 |
| SFRS3    | Serine/arginine B4E241  | 14194  | 97  | 2 |
| SFSWAP   | Splicing factor, Q12872 | 104758 | 40  | 1 |
| SHMT2    | Serine hydroxy H0YIZ0   | 28800  | 0   | 0 |
| SHQ1     | Protein SHQ1 f B4DL05   | 61510  | 0   | 0 |
| SHROOM3  | Protein Shroom Q8TF72   | 216724 | 0   | 0 |
| SIGMAR1  | Sigma non-opi Q99720    | 25112  | 0   | 0 |
| SKIV2L2  | Superkiller vira F5H7E2 | 106746 | 0   | 0 |
| SKP1     | S-phase kinase E5RJR5   | 18708  | 0   | 0 |
| SLC12A7  | Solute carrier f Q9Y666 | 119029 | 0   | 0 |
| SLC16A1  | Monocarboxyla Q5T8R3    | 31669  | 0   | 0 |
| SLC22A5  | Solute carrier f H7C1R8 | 15573  | 0   | 0 |
| SLC25A1  | Tricarboxylate P53007   | 33991  | 0   | 0 |
| SLC25A10 | Mitochondrial c B4DLN1  | 48069  | 60  | 1 |
| SLC25A11 | Mitochondrial i I3L1P8  | 32162  | 48  | 1 |
| SLC25A12 | Calcium-bindin B3KR64   | 62681  | 0   | 0 |
| SLC25A24 | Calcium-bindin Q6NUK1   | 53320  | 0   | 0 |
| SLC25A3  | Phosphate carr F8VVM2   | 36138  | 39  | 1 |
| SLC25A5  | ADP/ATP trans P05141    | 32831  | 257 | 7 |
| SLC25A6  | ADP/ATP trans P12236    | 32845  | 0   | 0 |
| SLIRP    | SRA stem-loop H0YJ40    | 10843  | 33  | 1 |
| SLTM     | SAFB-like tran H7BXE3   | 48819  | 0   | 0 |
| SMARCA2  | Probable globa P51531   | 181166 | 0   | 0 |
| SMARCA4  | SMARCA4 isof Q9HBD4     | 188031 | 47  | 1 |
| SMARCA5  | SWI/SNF-relat O60264    | 121828 | 0   | 0 |
| SMARCC1  | SWI/SNF com Q92922      | 122790 | 0   | 0 |
| SMARCC2  | SWI/SNF com F8VXC8      | 136100 | 86  | 2 |
| SMARCD1  | SWI/SNF-relat Q96GM5    | 58196  | 0   | 0 |
| SMC1A    | Structural mair Q14683  | 143144 | 33  | 1 |
| SMC1B    | Structural mair Q8NDV3  | 143818 | 0   | 0 |
| SMC3     | Structural mair Q9UQE7  | 141454 | 0   | 0 |
| SMC4     | Structural mair E9PD53  | 144365 | 220 | 5 |
| SMCHD1   | Structural mair J3KTL8  | 155549 | 0   | 0 |
| SMNDC1   | Survival of mot O75940  | 26694  | 106 | 2 |
| SMU1     | WD40 repeat-c Q2TAY7    | 57507  | 0   | 0 |
| SNAP23   | Synaptosomal- H3BM38    | 13897  | 0   | 0 |

|          |                        |        |      |    |
|----------|------------------------|--------|------|----|
| SNRNP200 | U5 small nucle O75643  | 244353 | 1276 | 25 |
| SNRNP40  | U5 small nucle Q96DI7  | 44488  | 61   | 1  |
| SNRNP70  | U1 small nucle P08621  | 51526  | 0    | 0  |
| SNRPA    | U1 small nucle M0QXK2  | 31259  | 112  | 3  |
| SNRPA1   | U2 small nucle H0YMA0  | 28398  | 275  | 19 |
| SNRPB2   | U2 small nucle P08579  | 25470  | 307  | 20 |
| SNRPC    | U1 small nucle P09234  | 17381  | 0    | 0  |
| SNRPD1   | Small nuclear r P62314 | 13273  | 301  | 9  |
| SNRPD2   | Small nuclear r P62316 | 13518  | 203  | 15 |
| SNRPD3   | Small nuclear r B4DJP7 | 13283  | 38   | 3  |
| SNRPE    | Small nuclear r P62304 | 10797  | 116  | 4  |
| SNRPF    | Small nuclear r P62306 | 9719   | 0    | 2  |
| SNRPG    | Small nuclear r P62308 | 8490   | 101  | 4  |
| SNRPN    | Small nuclear r B3KVR1 | 25059  | 214  | 8  |
| SNW1     | SNW domain-c G3V3A4    | 65351  | 0    | 0  |
| SNX9     | Sorting nexin-9 Q9Y5X1 | 66550  | 0    | 0  |
| SOD1     | Superoxide dis H7BYH4  | 13901  | 94   | 2  |
| SON      | Protein SON O:P18583   | 263664 | 0    | 0  |
| SP140L   | Nuclear body p H7BYP4  | 46190  | 0    | 0  |
| SPATA7   | Spermatogene: G3V287   | 9187   | 0    | 0  |
| SPDEF    | SAM pointed d O95238   | 37494  | 0    | 0  |
| SPEN     | Msx2-interacti F6WRY4  | 43002  | 0    | 0  |
| SPIN1    | Spindlin-1 OS= Q9Y657  | 29582  | 0    | 0  |
| SPIN2B   | Spindlin-2B (F) Q5JZB8 | 27794  | 32   | 1  |
| SPINK5   | Serine proteas Q9NQ38  | 120637 | 0    | 0  |
| SPRR3    | Small proline-r B1AN48 | 17048  | 38   | 1  |
| SPTA1    | Spectrin alpha P02549  | 279842 | 0    | 0  |
| SPTAN1   | Spectrin alpha Q13813  | 284772 | 116  | 2  |
| SPTBN1   | Spectrin beta c Q01082 | 274439 | 72   | 0  |
| SPTBN2   | Spectrin beta c O15020 | 271157 | 0    | 0  |
| SRM      | Spermidine syr K7EQ47  | 14421  | 0    | 0  |
| SRP14    | Signal recognit H0YLA2 | 13050  | 0    | 0  |
| SRP68    | Signal recognit Q9UHB9 | 70686  | 0    | 0  |
| SRP72    | Signal recognit D6RDY6 | 39641  | 0    | 0  |
| SRPRB    | Signal recognit Q9Y5M8 | 29684  | 0    | 0  |
| SRRM2    | Serine/arginine Q9UQ35 | 299438 | 0    | 0  |
| SRRT     | Serrate RNA ef Q9BXP5  | 100604 | 107  | 2  |
| SRSF1    | Serine/arginine J3KTL2 | 28312  | 7    | 0  |
| SRSF10   | Serine/arginine Q5JRI1 | 20900  | 5    | 0  |

|         |                         |        |     |    |
|---------|-------------------------|--------|-----|----|
| SRSF2   | Serine/arginine J3KP15  | 15518  | 40  | 1  |
| SRSF4   | Serine/arginine Q08170  | 56645  | 0   | 0  |
| SRSF5   | Serine/arginine Q13243  | 31245  | 0   | 0  |
| SRSF6   | Serine/arginine Q13247  | 39563  | 0   | 0  |
| SRSF7   | Serine/arginine C9JAB2  | 26912  | 0   | 0  |
| SRSF9   | Serine/arginine S4R3G0  | 25526  | 199 | 6  |
| SSB     | Lupus La prote P05455   | 46808  | 0   | 0  |
| SSBP1   | Single-strand E7EUY5    | 15703  | 0   | 0  |
| SSR1    | Translocon-ass F5H5Y2   | 29402  | 0   | 0  |
| SSR4    | Translocon-ass P51571   | 18987  | 0   | 0  |
| SSRP1   | FACT complex Q08945     | 81024  | 0   | 0  |
| STAG1   | Cohesin subun Q6P275    | 140001 | 0   | 0  |
| STAG2   | Cohesin subun F8WAK8    | 133986 | 0   | 0  |
| STK17A  | Serine/threonin Q9UEE5  | 46529  | 0   | 0  |
| STK38   | Serine/threonin Q15208  | 54155  | 0   | 0  |
| STK38L  | Serine/threonin I3L0D0  | 53968  | 0   | 0  |
| STMN1   | Stathmin OS=F P16949    | 17292  | 134 | 2  |
| STMN2   | Stathmin OS=F E5RGX5    | 19562  | 94  | 2  |
| STOML2  | Stomatin-like p B4E1K7  | 33317  | 0   | 0  |
| STRAP   | Serine-threonin B0AZV0  | 28488  | 0   | 0  |
| STRBP   | Spermatid peri Q96SI9   | 73606  | 0   | 0  |
| STRN4   | Striatin-4 (Frag R4GN16 | 34684  | 0   | 0  |
| SUB1    | Activated RNA P53999    | 14386  | 0   | 0  |
| SUGP1   | SURP and G-p B4DVK3     | 72425  | 948 | 20 |
| SUGP2   | SURP and G-p M0R2Z9     | 121468 | 0   | 0  |
| SUMO1   | SMT3 suppres B8ZZ67     | 7161   | 0   | 0  |
| SUMO3   | Small ubiquitin B4DUW4  | 15758  | 0   | 0  |
| SUN1    | SUN domain-c H0Y6N5     | 70999  | 0   | 0  |
| SUN2    | SUN domain-c J3KQE0     | 79037  | 0   | 0  |
| SUPT16H | FACT complex Q9Y5B9     | 119838 | 0   | 0  |
| SUPT6H  | Transcription e Q7KZ85  | 198949 | 0   | 0  |
| SURF4   | Surfeit 4 OS=F Q5T8U5   | 21114  | 0   | 0  |
| SYMPK   | Symplekin OS= Q92797    | 141059 | 0   | 0  |
| SYNCRIP | Heterogeneous O60506    | 69560  | 387 | 7  |
| TAF15   | TATA-binding J Q92804   | 61793  | 230 | 11 |
| TAGLN2  | Transgelin-2 O P37802   | 22377  | 0   | 0  |
| TARDBP  | TAR DNA-bind Q13148     | 44711  | 39  | 1  |
| TARS    | Threonine--tR G3XAN9    | 72022  | 0   | 0  |
| TAX1BP1 | Tax1-binding p B8ZZD4   | 93551  | 0   | 0  |

|          |                         |        |     |   |
|----------|-------------------------|--------|-----|---|
| TBC1D8B  | TBC1 domain f Q0IIM8    | 128627 | 0   | 0 |
| TBCA     | Tubulin-specifi B4DT30  | 15781  | 53  | 1 |
| TBL3     | Transducin bet Q12788   | 88978  | 0   | 0 |
| TBP      | TATA-box-binc H0Y6D8    | 11605  | 0   | 0 |
| TBRG4    | Protein TBRG4 H7C4R5    | 29590  | 0   | 0 |
| TCEB1    | Transcription e R4GMY8  | 6963   | 41  | 1 |
| TCEB2    | Transcription e I3L0M9  | 15592  | 108 | 3 |
| TCERG1   | Transcription e O14776  | 123823 | 0   | 0 |
| TCOF1    | Treacle protein J3KQ96  | 144040 | 0   | 0 |
| TECR     | Very-long-chai Q9NZ01   | 36011  | 0   | 0 |
| TEX10    | Testis-express Q9NXF1   | 105608 | 0   | 0 |
| TFAM     | Transcription f: H7BYN3 | 25662  | 0   | 0 |
| TFIP11   | Tuftelin-interac Q9UBB9 | 96758  | 0   | 0 |
| TGM1     | Protein-glutam H0YLT9   | 23400  | 0   | 0 |
| THOC1    | THO complex s J3KT14    | 28089  | 0   | 0 |
| THOC2    | THO complex s Q8NI27    | 182659 | 0   | 0 |
| THOC6    | THO complex s Q86W42    | 37511  | 0   | 0 |
| THRAP3   | Thyroid hormoi Q9Y2W1   | 108601 | 0   | 0 |
| TIA1     | Nucleolysin TI/ F8W8I6  | 42808  | 0   | 0 |
| TIAL1    | Nucleolysin TI/ Q01085  | 43421  | 0   | 1 |
| TIMM13   | Mitochondrial i Q9Y5L4  | 10493  | 0   | 0 |
| TIMM50   | Mitochondrial i M0R0C3  | 28204  | 0   | 0 |
| TJP1     | Tight junction j G3V1L9 | 197339 | 0   | 0 |
| TKT      | Transketolase B4E022    | 62839  | 0   | 0 |
| TMCC3    | Transmembran G3V207     | 50143  | 35  | 1 |
| TMCO1    | Transmembran J3QQY2     | 11365  | 0   | 0 |
| TMED10   | Transmembran P49755     | 24960  | 69  | 2 |
| TMED2    | Transmembran F5GX39     | 13622  | 32  | 1 |
| TMEM109  | Transmembran Q9BVC6     | 26194  | 0   | 0 |
| TMEM167A | Protein kish-A Q8TBQ9   | 8054   | 0   | 0 |
| TMEM189  | HCG2044781 C G3V2F7     | 42181  | 0   | 0 |
| TMEM194A | Transmembran G3V5K2     | 12019  | 0   | 0 |
| TMEM201  | Transmembran H0Y4R5     | 59803  | 0   | 0 |
| TMEM33   | Transmembran D6RAA6     | 25207  | 0   | 0 |
| TMEM43   | Transmembran Q9BTV4     | 44847  | 0   | 0 |
| TMEM97   | Transmembran J3KT68     | 10969  | 32  | 1 |
| TMOD3    | Tropomodulin- H0YKU1    | 20889  | 0   | 0 |
| TMPO     | Lamina-associ. P42167   | 75446  | 35  | 1 |
| TMPRSS13 | Transmembran J3KQC6     | 63127  | 0   | 1 |

|              |                          |        |      |    |
|--------------|--------------------------|--------|------|----|
| TMX1         | Thioredoxin-re G3V448    | 11904  | 0    | 0  |
| TNRC6B       | Isoform 2 of Tr Q9UPQ9-1 | 182703 | 0    | 0  |
| TOMM20       | Mitochondrial i Q15388   | 16288  | 0    | 0  |
| TOMM22       | Mitochondrial i Q9NS69   | 15512  | 0    | 0  |
| TOMM40       | Mitochondrial i O96008   | 37869  | 0    | 0  |
| TOMM5        | Mitochondrial i F8W8Z9   | 10969  | 0    | 0  |
| TOP1         | DNA topoisom P11387      | 90669  | 0    | 0  |
| TOP2A        | DNA topoisom P11388      | 174276 | 0    | 0  |
| TOP2B        | DNA topoisom E9PCY5      | 130398 | 0    | 0  |
| TP53         | Cellular tumor P04637    | 43625  | 0    | 0  |
| TPI1         | Triosephospha P60174     | 30772  | 83   | 3  |
| TPM3         | Tropomyosin 3 Q5VU58     | 33202  | 0    | 0  |
| TPR          | Nucleoprotein P12270     | 267131 | 156  | 3  |
| TRA2A        | Transformer-2 Q13595     | 32669  | 46   | 1  |
| TRA2B        | Transformer-2 P62995     | 33646  | 113  | 2  |
| TRAM1        | Translocating c G3XAN4   | 33414  | 0    | 0  |
| TRAP1        | Heat shock pro I3L0K7    | 57184  | 0    | 0  |
| TRIM21       | E3 ubiquitin-pr F5H012   | 54047  | 0    | 0  |
| TRIM23       | E3 ubiquitin-pr P36406   | 64025  | 38   | 1  |
| TRIM28       | Transcription ir Q13263  | 88493  | 0    | 0  |
| TRIM6-TRIM34 | Protein TRIM6 B2RNG4     | 97666  | 0    | 0  |
| TRMU         | Mitochondrial t O75648   | 47714  | 35   | 1  |
| TRRAP        | Transformator H0Y4W2     | 405650 | 0    | 0  |
| TSPAN10      | Tetraspanin-1C Q9H1Z9    | 36475  | 0    | 1  |
| TTN          | Titin (Fragmen H7C1P9    | 109167 | 0    | 0  |
| TUBA1A       | Tubulin alpha- I Q71U36  | 50104  | 608  | 12 |
| TUBA1C       | Tubulin alpha- I F5H5D3  | 57693  | 374  | 6  |
| TUBA4B       | Putative tubulin Q9H853  | 27534  | 12   | 0  |
| TUBB         | Tubulin beta c I P07437  | 49639  | 134  | 3  |
| TUBB2B       | Tubulin beta-2 Q9BVA1    | 49921  | 0    | 0  |
| TUBB3        | Tubulin beta-3 Q13509    | 50400  | 381  | 6  |
| TUBB4B       | Tubulin beta-4 P68371    | 49799  | 140  | 2  |
| TUFM         | Elongation fact P49411   | 49510  | 319  | 7  |
| TUSC3        | Tumor suppres D6RA37     | 33068  | 0    | 0  |
| TXN          | Thioredoxin O S P10599   | 11730  | 1    | 0  |
| TXNL4A       | Thioredoxin-lik K7ESL1   | 8457   | 0    | 0  |
| U2AF1        | Splicing factor Q01081   | 27854  | 200  | 6  |
| U2AF2        | Splicing factor K7ENG2   | 53467  | 830  | 20 |
| U2SURP       | U2 snRNP-ass O15042      | 118219 | 2279 | 60 |

|          |                         |        |     |    |
|----------|-------------------------|--------|-----|----|
| UBA1     | Ubiquitin-like r Q5JRR6 | 56816  | 0   | 0  |
| UBA52    | Ubiquitin-60S r M0R1V7  | 12795  | 36  | 1  |
| UBB      | Ubiquitin (Frag J3QS39  | 10463  | 52  | 2  |
| UBE2M    | NEDD8-conjug M0QX69     | 8234   | 1   | 0  |
| UBE2NL   | Putative ubiqui Q5JXB2  | 17366  | 0   | 0  |
| UBTF     | Nucleolar trans E9PKP7  | 87380  | 0   | 0  |
| UCHL1    | Ubiquitin carbc D6R956  | 26823  | 32  | 1  |
| UFC1     | Ubiquitin-fold r Q9Y3C8 | 19446  | 0   | 0  |
| UFL1     | E3 UFM1-protε Q94874    | 89540  | 0   | 0  |
| UGGT1    | UDP-glucose:g Q9NYU2    | 177078 | 0   | 0  |
| UGT2B15  | UDP-glucuronc P54855    | 60996  | 0   | 0  |
| UQCR10   | Cytochrome b- Q9UDW1    | 7304   | 0   | 0  |
| UQCRC1   | Cytochrome b- P31930    | 52612  | 0   | 0  |
| UQCRC2   | Cytochrome b- H3BP04    | 19460  | 0   | 0  |
| URB1     | Nucleolar pre-r O60287  | 254227 | 0   | 0  |
| USMG5    | Up-regulated d Q96IX5   | 6453   | 0   | 0  |
| USP17L24 | Ubiquitin carbc Q0WX57  | 59673  | 0   | 0  |
| USP28    | Ubiquitin carbc H0YG96  | 41909  | 0   | 0  |
| USP39    | U4/U6.U5 tri-s B9A018   | 62005  | 0   | 0  |
| USP9X    | Probable ubiqu Q93008   | 292094 | 0   | 0  |
| UTP14C   | U3 small nucle Q5TAP6   | 87135  | 0   | 0  |
| UTP15    | U3 small nucle H0Y8P4   | 61393  | 0   | 0  |
| UTP18    | U3 small nucle Q9Y5J1   | 61964  | 0   | 0  |
| UTP20    | Small subunit r O75691  | 318182 | 0   | 0  |
| UTP3     | Something abo Q9NQZ2    | 54525  | 0   | 0  |
| UTS2     | Urotensin-2 Oε Q5H8X8   | 16266  | 0   | 0  |
| VAMP2    | Vesicle-associα J3QRU4  | 12243  | 0   | 0  |
| VAPA     | Vesicle-associα Q9P0L0  | 27875  | 0   | 0  |
| VAPB     | Vesicle-associα Q95292  | 27211  | 63  | 1  |
| VARS     | Valine--tRNA li H0Y426  | 32490  | 0   | 0  |
| VCP      | Transitional en P55072  | 89266  | 131 | 3  |
| VDAC1    | Voltage-depen P21796    | 30754  | 158 | 3  |
| VDAC2    | Voltage-depen B4DKM5    | 27462  | 132 | 3  |
| VDAC3    | Voltage-depen F5H740    | 30738  | 44  | 1  |
| VIM      | Vimentin OS=τ P08670    | 53619  | 986 | 19 |
| WAPAL    | Wings apart-lik Q7Z5K2  | 132863 | 0   | 0  |
| WARS     | Tryptophan--tF P23381   | 53132  | 37  | 1  |
| WBP11    | WW domain-bi F5H5G4     | 23147  | 0   | 0  |
| WDR12    | Ribosome biog Q9GZL7    | 47678  | 0   | 0  |

|         |                          |        |     |   |
|---------|--------------------------|--------|-----|---|
| WDR18   | WD repeat-cor U3KQC1     | 43321  | 43  | 1 |
| WDR3    | WD repeat-cor Q9UNX4     | 106032 | 0   | 0 |
| WDR33   | pre-mRNA 3~ (Q9C0J8      | 145799 | 40  | 1 |
| WDR36   | WD repeat-cor Q8NI36     | 105255 | 0   | 0 |
| WDR43   | WD repeat-cor Q15061     | 74843  | 0   | 0 |
| WDR5    | WD repeat-cor P61964     | 36565  | 0   | 0 |
| WDR77   | Methylosome p B4DP38     | 36701  | 0   | 0 |
| WDR82   | WD repeat-cor Q6UXN9     | 35056  | 0   | 0 |
| WHSC1L1 | Histone-lysine B7ZL11    | 160212 | 0   | 0 |
| WNK2    | Serine/threonine H0Y7T5  | 234438 | 0   | 0 |
| XAB2    | Pre-mRNA-spli F5H315     | 99617  | 0   | 0 |
| XPNPEP3 | Probable Xaa-F Q9NQH7    | 56997  | 4   | 0 |
| XPO1    | Exportin-1 OS= O14980    | 123306 | 0   | 0 |
| XRCC5   | X-ray repair cr P13010   | 82652  | 82  | 2 |
| XRCC6   | X-ray repair cr P12956   | 69799  | 221 | 4 |
| XRN2    | 5~-3~ exoribor B4DZC3    | 102351 | 0   | 0 |
| YBX1    | Nuclease-sens H0Y449     | 41991  | 0   | 0 |
| YEATS2  | YEATS domain H0Y6M6      | 21152  | 35  | 1 |
| YIF1B   | Protein YIF1B (Q5BJH7    | 34413  | 0   | 0 |
| YLPM1   | Isoform 4 of YL P49750-4 | 241495 | 0   | 0 |
| YTHDC1  | YTH domain-c J3QR07      | 85536  | 0   | 0 |
| YWHAB   | 14-3-3 protein P31946    | 28065  | 112 | 2 |
| YWHAE   | 14-3-3 protein P62258    | 29155  | 208 | 6 |
| YWHAG   | 14-3-3 protein P61981    | 28285  | 254 | 6 |
| YWHAH   | 14-3-3 protein A2IDB2    | 28201  | 0   | 0 |
| YWHAQ   | 14-3-3 protein P27348    | 27747  | 56  | 1 |
| YWHAZ   | 14-3-3 protein E7EX29    | 28019  | 189 | 5 |
| ZBBX    | Zinc finger B-b F2Z370   | 87945  | 0   | 0 |
| ZC3H14  | Zinc finger CC( H0YJA2   | 73271  | 0   | 0 |
| ZC3H3   | Zinc finger CC( Q8IXZ2   | 101878 | 0   | 0 |
| ZFYVE19 | Zinc finger FY\ H3BN64   | 29680  | 46  | 1 |
| ZMYM2   | Zinc finger MY Q9UBW7    | 154810 | 0   | 0 |
| ZMYM4   | Zinc finger MY Q5VZL5    | 172677 | 0   | 0 |
| ZMYM6NB | Uncharacterize Q8NCS4    | 16873  | 0   | 0 |
| ZMYND8  | Protein kinase Q2HXV1    | 126336 | 0   | 0 |
| ZNF326  | DBIRD comple: Q5BKZ1     | 65613  | 361 | 6 |
| ZNF638  | Zinc finger prot Q14966  | 220488 | 0   | 0 |
| ZNF687  | Zinc finger prot H0Y5I5  | 75622  | 0   | 0 |
| ZRANB2  | Zinc finger Ran O95218   | 37382  | 0   | 0 |



|        |                        |       |   |   |
|--------|------------------------|-------|---|---|
| ZSCAN2 | Zinc finger and F5GY18 | 22609 | 0 | 0 |
|--------|------------------------|-------|---|---|

| gene name | protein score | group        |
|-----------|---------------|--------------|
| DDX3X     | 218           | mRNA binding |
| ELAVL1    | 182           |              |
| ILF2      | 590           |              |
| PABPC1    | 33            |              |
| SRRT      | 107           |              |
| SNRPD1    | 259           | Sm           |
| SNRPD2    | 161           |              |
| SNRPD3    | 38            |              |
| SNRPE     | 66            |              |
| SNRPG     | 101           |              |
| SNRPA     | 112           | U1           |
| PHF5A     | 78            | U2           |
| SF3A1     | 1062          |              |
| SF3A2     | 565           |              |
| SF3A3     | 1019          |              |
| SF3B1     | 2486          |              |
| SF3B14    | 108           |              |
| SF3B2     | 1667          |              |
| SF3B3     | 1781          |              |
| SF3B4     | 181           |              |
| SF3B5     | 127           |              |
| SNRPA1    | 307           |              |
| SNRPB2    | 307           |              |
| CHERP     | 1107          | U2 rel       |
| DDX42     | 35            |              |
| DDX46     | 38            |              |
| DHX15     | 1481          |              |
| DNAJC8    | 666           |              |
| RBM17     | 739           |              |
| SMNDC1    | 106           |              |
| U2AF1     | 200           |              |
| U2AF2     | 783           |              |
| U2SURP    | 1903          |              |
| BUB3      | 118           |              |
| C19orf43  | 197           |              |
| CCAR1     | 1670          |              |

|           |      |           |
|-----------|------|-----------|
| DDX17     | 225  | A         |
| DDX5      | 267  |           |
| FUS       | 213  |           |
| RBM10     | 990  |           |
| RBM39     | 92   |           |
| RBM5      | 1226 |           |
| SF1       | 655  |           |
| SUGP1     | 914  |           |
| EFTUD2    | 170  | U5        |
| PRPF6     | 48   |           |
| PRPF8     | 1858 |           |
| SNRNP200  | 1276 |           |
| SNRNP40   | 61   |           |
| NHP2L1    | 57   | U4/U6     |
| PRPF3     | 30   |           |
| HSPA8     | 817  | Prp19     |
| PRPF19    | 171  |           |
| AQR       | 47   | Prp19 rel |
| GNB2L1    | 84   | C2        |
| MATR3     | 588  |           |
| LSM6      | 62   | LSm       |
| SRSF1     | 4    | SR        |
| SRSF10    | 5    |           |
| SRSF2     | 40   |           |
| SRSF9     | 351  |           |
| TRA2A     | 46   |           |
| TRA2B     | 113  |           |
| HNRNPA0   | 99   | hnRNP     |
| HNRNPA1   | 129  |           |
| HNRNPA2B1 | 132  |           |
| HNRNPC    | 265  |           |
| HNRNPD    | 194  |           |
| HNRNPH1   | 45   |           |
| HNRNPH3   | 102  |           |
| HNRNPK    | 132  |           |
| HNRNPM    | 386  |           |
| HNRNPR    | 553  |           |
| HNRNPU    | 224  |           |

|          |     |          |
|----------|-----|----------|
| HNRNPUL1 | 256 |          |
| PCBP1    | 30  |          |
| PTBP1    | 183 |          |
| RALY     | 125 |          |
| RBMX     | 214 |          |
| SYNCRIP  | 387 |          |
| C16orf80 | 199 | MISC     |
| CIRBP    | 6   |          |
| ILF3     | 749 |          |
| KHDRBS1  | 402 |          |
| PRMT5    | 85  |          |
| ACIN1    | 46  | EJC/TREX |
| DDX39B   | 72  |          |
| EIF4A3   | 197 |          |
| MAGOH    | 46  |          |
| RBM8A    | 76  |          |
| SAP18    | 48  |          |
| 2        | 124 |          |
| 4        | 34  |          |
| 7        | 133 |          |
| 8        | 39  |          |
| ACAT1    | 220 |          |
| ACTL6A   | 17  |          |
| ACTN4    | 133 |          |
| ADAR     | 486 |          |
| AGO1     | 77  |          |
| AHNAK    | 79  |          |
| AK2      | 201 |          |
| AKAP8    | 175 |          |
| ALDOA    | 343 |          |
| ALDOC    | 172 |          |
| ANKFY1   | 55  |          |
| ANP32A   | 219 |          |
| ANP32B   | 205 |          |
| ANXA2    | 60  |          |
| ANXA6    | 47  |          |
| API5     | 69  |          |
| APRT     | 22  |          |

|           |     |
|-----------|-----|
| ARF4      | 148 |
| ARF6      | 38  |
| ATP13A1   | 35  |
| ATP5A1    | 149 |
| ATP5D     | 114 |
| ATP5G1    | 34  |
| ATP5L     | 40  |
| ATPIF1    | 38  |
| BCAP31    | 157 |
| BLOC1S6   | 40  |
| BOLA2     | 53  |
| C14orf166 | 330 |
| C19orf10  | 64  |
| C1QBP     | 116 |
| C21orf33  | 54  |
| CALM2     | 50  |
| CALR      | 252 |
| CAND1     | 38  |
| CBX1      | 41  |
| CCT4      | 163 |
| CCT5      | 58  |
| CCT8      | 31  |
| CFL1      | 33  |
| CFTR      | 35  |
| CHD4      | 111 |
| CHN1      | 30  |
| CKAP5     | 123 |
| CKB       | 103 |
| CKMT1A    | 71  |
| CLTC      | 653 |
| CNPY2     | 52  |
| CNTNAP4   | 11  |
| COMT      | 47  |
| COPB2     | 47  |
| COPG2     | 48  |
| COX7A2    | 59  |
| CPA5      | 30  |
| CPSF1     | 76  |

|                    |     |
|--------------------|-----|
| CPSF6              | 223 |
| CPSF7              | 150 |
| CPVL               | 88  |
| CRTAP              | 178 |
| CS                 | 73  |
| CSNK2B-LY6G5B-1181 | 68  |
| CTBP2              | 32  |
| CTTNBP2            | 2   |
| CYCS               | 50  |
| DAD1               | 91  |
| DAPP1              | 1   |
| DAZAP1             | 84  |
| DCXR               | 56  |
| DDB1               | 119 |
| DDX1               | 70  |
| DDX39A             | 62  |
| DHCR7              | 35  |
| DIABLO             | 66  |
| DLD                | 200 |
| DNAI2              | 32  |
| DNAJA2             | 36  |
| DNAJA3             | 42  |
| DNAJC10            | 35  |
| DNMT1              | 34  |
| DYNC1H1            | 774 |
| ECHS1              | 79  |
| ECI1               | 54  |
| EDC4               | 32  |
| EDF1               | 48  |
| EEF1A1P5           | 28  |
| EEF1A2             | 429 |
| EEF1G              | 232 |
| EEF2               | 22  |
| EIF4A2             | 33  |
| EIF4H              | 82  |
| EIF5A              | 203 |
| ENDOV              | 30  |
| ENO1               | 193 |

|           |      |
|-----------|------|
| EP400     | 32   |
| ERP29     | 75   |
| ETFA      | 92   |
| ETFB      | 82   |
| EWSR1     | 4    |
| FARP2     | 33   |
| FASN      | 40   |
| FBL       | 34   |
| FLNA      | 364  |
| FUBP1     | 143  |
| GANAB     | 200  |
| GAPDH     | 204  |
| GCN1L1    | 256  |
| GIGYF2    | 42   |
| GK        | 39   |
| GNA12     | 42   |
| GNAS      | 42   |
| GNB1      | 40   |
| GOT2      | 116  |
| GPI       | 131  |
| GSTO1     | 38   |
| GTF2I     | 43   |
| H2AFZ     | 99   |
| H3F3A     | 8    |
| HDAC4     | 33   |
| HIST1H2AG | 228  |
| HIST1H2BN | 142  |
| HMGB1P1   | 34   |
| HNRNPDL   | 57   |
| HNRNPL    | 58   |
| HNRNPUL2  | 636  |
| HSD17B10  | 49   |
| HSD17B12  | 162  |
| HSD17B4   | 220  |
| HSP90AA1  | 292  |
| HSP90B1   | 197  |
| HSPA4     | 56   |
| HSPA5     | 1097 |

|             |     |
|-------------|-----|
| HSPA6       | 100 |
| HSPA9       | 514 |
| HSPD1       | 303 |
| HSPE1       | 89  |
| IGLL5       | 1   |
| IREB2       | 74  |
| KATNAL2     | 51  |
| KBTBD3      | 1   |
| KHSRP       | 58  |
| KLRC4-KLRK1 | 34  |
| LAMA5       | 33  |
| LANCL1      | 50  |
| LCN1        | 134 |
| LDHA        | 107 |
| LDHB        | 131 |
| LEPRE1      | 275 |
| LIG3        | 32  |
| LIMA1       | 14  |
| LMNA        | 149 |
| LMNB1       | 461 |
| LMNB2       | 255 |
| LUC7L2      | 77  |
| MAP1B       | 68  |
| MDH2        | 175 |
| MDN1        | 171 |
| METTL3      | 35  |
| MSH2        | 35  |
| MT-CO2      | 37  |
| MYEF2       | 42  |
| MYL12A      | 36  |
| NCL         | 936 |
| NDUFS3      | 93  |
| NKRF        | 123 |
| NME1-NME2   | 142 |
| NME3        | 30  |
| NONO        | 111 |
| NPM1        | 210 |
| NUDT16L1    | 91  |

ungrouped



|        |     |
|--------|-----|
| NUDT21 | 563 |
| NUP210 | 71  |
| P4HB   | 266 |
| PA2G4  | 93  |
| PABPN1 | 38  |
| PARP1  | 73  |
| PCMT1  | 28  |
| PCNP   | 433 |
| PDIA3  | 341 |
| PDIA4  | 32  |
| PELP1  | 31  |
| PFKP   | 34  |
| PFN1   | 37  |
| PGAM1  | 38  |
| PGK1   | 133 |
| PHB    | 189 |
| PHB2   | 272 |
| PHGDH  | 136 |
| PLOD1  | 246 |
| POLR2A | 125 |
| PPIA   | 157 |
| PPIB   | 72  |
| PPIF   | 163 |
| PPP2CB | 32  |
| PPP6R2 | 32  |
| PRAF2  | 56  |
| PRC1   | 5   |
| PRDX2  | 13  |
| PRDX3  | 1   |
| PRDX4  | 163 |
| PRDX6  | 48  |
| PRKCSH | 77  |
| PRKDC  | 753 |
| PRPF39 | 15  |
| PSMA1  | 31  |
| PSMA3  | 82  |
| PSMB5  | 115 |
| PTMA   | 52  |

|          |     |
|----------|-----|
| RAB10    | 142 |
| RAB15    | 91  |
| RAB33B   | 31  |
| RAB35    | 91  |
| RAB5C    | 126 |
| RAB6A    | 31  |
| RAD50    | 85  |
| RAN      | 94  |
| RAP1B    | 34  |
| RBBP4    | 121 |
| RBM14    | 405 |
| RBM15    | 52  |
| RBM6     | 330 |
| RBMXL1   | 237 |
| RBP3     | 30  |
| RCC1     | 31  |
| RCC2     | 40  |
| RECQL    | 40  |
| RGPD1    | 57  |
| RHCE     | 34  |
| RP1      | 33  |
| RPL12    | 79  |
| RPN1     | 36  |
| RPS5     | 88  |
| RPSAP58  | 48  |
| RTCB     | 329 |
| RTN1     | 38  |
| RTN3     | 78  |
| RUFY2    | 4   |
| RUVBL1   | 99  |
| S100A8   | 79  |
| SAFB     | 660 |
| SCAMP1   | 77  |
| SEC22B   | 89  |
| SET      | 142 |
| SFRS3    | 97  |
| SFSWAP   | 40  |
| SLC25A10 | 60  |

|          |     |
|----------|-----|
| SLC25A11 | 48  |
| SLC25A3  | 39  |
| SLC25A5  | 257 |
| SLIRP    | 33  |
| SMARCA4  | 47  |
| SMARCC2  | 86  |
| SMC1A    | 33  |
| SMC4     | 220 |
| SNRPN    | 214 |
| SOD1     | 94  |
| SPIN2B   | 32  |
| SPRR3    | 38  |
| SPTAN1   | 116 |
| SPTBN1   | 72  |
| STMN1    | 134 |
| STMN2    | 94  |
| TAF15    | 81  |
| TARDBP   | 39  |
| TBCA     | 53  |
| TCEB1    | 41  |
| TCEB2    | 108 |
| TMCC3    | 35  |
| TMED10   | 69  |
| TMED2    | 32  |
| TMEM97   | 32  |
| TMPO     | 35  |
| TPI1     | 83  |
| TPR      | 156 |
| TRIM23   | 38  |
| TRMU     | 35  |
| TUBA1A   | 608 |
| TUBA1C   | 374 |
| TUBA4B   | 12  |
| TUBB     | 134 |
| TUBB3    | 381 |
| TUBB4B   | 140 |
| TUFM     | 319 |
| TXN      | 1   |

|         |     |
|---------|-----|
| UBB     | 52  |
| UBE2M   | 1   |
| UCHL1   | 32  |
| VAPB    | 63  |
| VCP     | 131 |
| VDAC1   | 158 |
| VDAC2   | 132 |
| VDAC3   | 44  |
| VIM     | 885 |
| WARS    | 37  |
| WDR18   | 43  |
| WDR33   | 40  |
| XPNPEP3 | 4   |
| XRCC5   | 82  |
| XRCC6   | 221 |
| YEATS2  | 35  |
| YWHAB   | 112 |
| YWHAE   | 137 |
| YWHAG   | 254 |
| YWHAQ   | 56  |
| YWHAZ   | 189 |
| ZFYVE19 | 46  |
| ZNF326  | 361 |

**protein score**

high

|      |
|------|
| 2500 |
| 2000 |
| 1500 |
| 1000 |
| 500  |
| 0    |

low

| GeneName | prot_desc        | prot_acc | prot_mass | prot_.score | prot_.matches |
|----------|------------------|----------|-----------|-------------|---------------|
|          | 1 Uncharacterize | M0QYC6   | 12045     | 0           | 0             |
|          | 2 Uncharacterize | F5H423   | 23331     | 0           | 0             |
|          | 3 Uncharacterize | H0YHG0   | 59149     | 0           | 0             |
|          | 4 Uncharacterize | H7BZT4   | 10832     | 0           | 0             |
|          | 5 Ig kappa chain | P01614   | 12668     | 0           | 3             |
|          | 6 Uncharacterize | H7C0C1   | 21328     | 0           | 0             |
| A2M      | Alpha-2-macro    | P01023   | 163188    | 3           | 0             |
| AARD     | Alanine and arg  | Q4LEZ3   | 17564     | 39          | 1             |
| AATF     | Protein AATF     | CQ9NY61  | 63094     | 0           | 0             |
| ABCB6    | ATP-binding c    | H7B XK9  | 77498     | 0           | 0             |
| ACAA2    | 3-ketoacyl-CoA   | K7EME0   | 36260     | 0           | 0             |
| ACAT1    | Acetyl-CoA ac    | P24752   | 45171     | 0           | 0             |
| ACIN1    | Apoptotic chro   | S4R3H4   | 145355    | 33          | 1             |
| ACOT13   | Acyl-coenzyme    | Q9NPJ3   | 14951     | 0           | 0             |
| ACP1     | Low molecular    | F2Z2Q9   | 7496      | 0           | 0             |
| ACSL1    | Long-chain-fat   | H0Y9U7   | 32788     | 32          | 1             |
| ACTA1    | Actin, alpha sk  | Q5T8M7   | 37800     | 0           | 0             |
| ACTB     | Actin, cytoplas  | P60709   | 41710     | 56          | 2             |
| ACTBL2   | Beta-actin-like  | Q562R1   | 41976     | 0           | 0             |
| ACTC1    | Actin, alpha ca  | P68032   | 41992     | 67          | 3             |
| ACTG1    | Actin, cytoplas  | I3L1U9   | 23830     | 0           | 0             |
| ACTL6A   | Actin-like prote | O96019   | 47430     | 1           | 0             |
| ACTN1    | Alpha-actinin-1  | G3V2W4   | 102993    | 0           | 0             |
| ACTN4    | Alpha-actinin-4  | O43707   | 104788    | 0           | 0             |
| ADAD2    | Adenosine dea    | H3BNP6   | 28653     | 0           | 0             |
| ADAR     | Double-strand    | H0YCK3   | 140739    | 577         | 12            |
| ADC      | Arginine decar   | Q96A70   | 49947     | 0           | 0             |
| ADNP     | Activity-depend  | Q9H2P0   | 123485    | 0           | 0             |
| AGL      | Glycogen debr    | P35573   | 174652    | 0           | 0             |
| AGO1     | Protein argona   | Q9UL18   | 97152     | 0           | 0             |
| AGO2     | Protein argona   | Q9UKV8   | 97146     | 0           | 0             |
| AGO3     | Protein argona   | Q9H9G7   | 97298     | 86          | 2             |
| AHCTF1   | Protein ELYS     | CQ8WYP5  | 252342    | 0           | 0             |
| AHCY     | Adenosylhomo     | P23526   | 47685     | 0           | 0             |
| AHNAK    | Neuroblast diff  | Q09666   | 628699    | 0           | 0             |
| AIFM1    | Apoptosis-indu   | O95831   | 66859     | 0           | 0             |
| AK2      | Adenylate kina   | F8W1A4   | 25614     | 0           | 0             |
| AKAP8    | A-kinase anch    | O43823   | 76061     | 204         | 6             |

|             |                                |        |     |   |
|-------------|--------------------------------|--------|-----|---|
| AKAP8L      | A-kinase anch $\alpha$ Q9ULX6  | 71604  | 144 | 4 |
| AKR1A1      | Alcohol dehydr Q5T621          | 16506  | 0   | 0 |
| AKR1B1      | Aldose reducta E9PCX2          | 29426  | 0   | 0 |
| ALDH18A1    | Delta-1-pyrroli P54886         | 87248  | 0   | 0 |
| ALDOA       | Fructose-bisph H3BPS8          | 39315  | 0   | 0 |
| ALDOC       | Fructose-bisph P09972          | 39431  | 0   | 0 |
| ALG13       | Isoform 2 of Pl Q9NP73-2       | 18213  | 32  | 1 |
| ALYREF      | THO complex $\epsilon$ E9PB61  | 27541  | 0   | 0 |
| ANKFY1      | Ankyrin repeat Q9P2R3          | 128318 | 0   | 0 |
| ANP32A      | Acidic leucine- H0YN26         | 19985  | 1   | 0 |
| ANP32B      | Acidic leucine- Q5T6W8         | 28770  | 32  | 1 |
| ANP32C      | Acidic leucine- O43423         | 26746  | 98  | 2 |
| ANXA2       | Annexin (Fragm H0YKL9          | 19518  | 0   | 0 |
| ANXA5       | Annexin OS=H D6RBL5            | 29319  | 0   | 0 |
| ANXA6       | Annexin (Fragm H0YC77          | 10129  | 0   | 0 |
| APEX1       | DNA-(apurinic G3V3M6           | 29172  | 0   | 0 |
| APH1B       | Gamma-secret H0YKZ9            | 20749  | 0   | 0 |
| APOB        | Apolipoprotein P04114          | 515283 | 0   | 0 |
| APOBEC3C    | DNA dC->dU- $\epsilon$ Q9NRW3  | 22811  | 90  | 2 |
| APRT        | Adenine phosp H3BQB1           | 17551  | 0   | 0 |
| ARF3        | ADP-ribosylati $\alpha$ B7ZB63 | 20588  | 0   | 0 |
| ARF4        | ADP-ribosylati $\alpha$ P18085 | 20498  | 0   | 0 |
| ARF5        | ADP-ribosylati $\alpha$ P84085 | 20517  | 0   | 0 |
| ARF6        | ADP-ribosylati $\alpha$ P62330 | 20069  | 69  | 1 |
| ARHGEF17    | Rho guanine n $\alpha$ Q96PE2  | 221535 | 33  | 1 |
| ARHGEF18    | Rho guanine n $\alpha$ M0QZS0  | 91352  | 0   | 0 |
| ARHGEF19    | Rho guanine n $\alpha$ H0Y4D8  | 34549  | 0   | 0 |
| ARL1        | ADP-ribosylati $\alpha$ B4DWW1 | 18554  | 70  | 1 |
| ARL8B       | ADP-ribosylati $\alpha$ B4DI85 | 18630  | 0   | 0 |
| ARPC3       | Actin-related p F8VR50         | 9720   | 0   | 0 |
| ARPC4-TTLL3 | Protein ARPC4 H7C0A3           | 21045  | 0   | 0 |
| ASAP2       | Arf-GAP with S O43150          | 111581 | 4   | 0 |
| ATAD3B      | ATPase family Q5T9A4           | 72527  | 0   | 0 |
| ATIC        | Phosphoribosy F5GWY2           | 58579  | 0   | 0 |
| ATP13A1     | Probable cation Q9HD20         | 132870 | 0   | 0 |
| ATP1A1      | Sodium/potass P05023           | 112824 | 0   | 0 |
| ATP5A1      | ATP synthase $\epsilon$ K7ENP3 | 59714  | 0   | 0 |
| ATP5B       | ATP synthase $\epsilon$ F8VPV9 | 56525  | 0   | 0 |
| ATP5C1      | ATP synthase $\epsilon$ B4DL14 | 27495  | 0   | 0 |

|              |                                 |        |     |    |
|--------------|---------------------------------|--------|-----|----|
| ATP5D        | ATP synthase $\epsilon$ P30049  | 17479  | 0   | 0  |
| ATP5G1       | ATP synthase F1D6R9H7           | 10188  | 0   | 0  |
| ATP5J2-PTCD1 | Pentatricopept G3V325           | 84057  | 0   | 0  |
| ATP5L        | ATP synthase $\epsilon$ E9PN17  | 8447   | 0   | 0  |
| ATP5O        | ATP synthase $\epsilon$ H7C086  | 8128   | 0   | 0  |
| ATP6V0C      | V-type proton F1P27449          | 15725  | 0   | 0  |
| ATP6V1C1     | V-type proton F1E7EV59          | 35686  | 31  | 1  |
| ATPIF1       | ATPase inhibitor Q9UII2         | 12241  | 0   | 0  |
| BAG2         | BAG family member B4DXE2        | 20176  | 0   | 0  |
| BAG4         | BAG family member O95429        | 49563  | 43  | 1  |
| BANF1        | Barrier-to-autophagy O75531     | 10052  | 0   | 0  |
| BARD1        | BRCA1-associated E7EUI3         | 62141  | 0   | 0  |
| BAX          | Apoptosis regulator Q07812      | 21171  | 0   | 0  |
| BAZ1B        | Tyrosine-protein kinase Q9UIG0  | 170796 | 0   | 0  |
| BCAP31       | B-cell receptor P51572          | 27974  | 0   | 0  |
| BCAS2        | Pre-mRNA-splicing O75934        | 26115  | 0   | 0  |
| BCLAF1       | Bcl-2-associated E9PK09         | 83183  | 0   | 0  |
| BEAN1        | Isoform 3 of Protein Q3B7T3-3   | 22331  | 0   | 0  |
| bK150C2.9    | BK150C2.9 protein Q6ICH2        | 24136  | 0   | 0  |
| BLOC1S6      | Biogenesis of lysosomes H3BNE3  | 13587  | 68  | 2  |
| BMS1         | Ribosome biogenesis Q14692      | 145716 | 0   | 0  |
| BOLA2        | BolA-like protein H3BTW0        | 10110  | 0   | 0  |
| BPTF         | Nucleosome-remodeling F5GXF5    | 271364 | 0   | 0  |
| BRI3BP       | BRI3-binding protein Q8WY22     | 27818  | 0   | 0  |
| BRIX1        | Ribosome biogenesis Q8TDN6      | 41375  | 0   | 0  |
| BSG          | Basigin OS=Hc P35613            | 42174  | 0   | 0  |
| BUB3         | Mitotic checkpoint J3QT28       | 31684  | 0   | 0  |
| BUD31        | Protein BUD31 C9JNV2            | 13559  | 0   | 0  |
| BYSL         | Bystin OS=Hor Q13895            | 49570  | 0   | 0  |
| C10orf115    | Putative uncharacterized Q5QP74 | 10337  | 0   | 0  |
| C11orf31     | Selenoprotein IH0YE28           | 10435  | 0   | 0  |
| C11orf84     | Uncharacterized Q9BUA3          | 41011  | 0   | 0  |
| C12orf23     | UPF0444 transmembrane Q8WUH6    | 11741  | 47  | 1  |
| C14orf166    | UPF0568 protein Q9Y224          | 28051  | 373 | 6  |
| C16orf80     | UPF0468 protein Q9Y6A4          | 22760  | 207 | 5  |
| C19orf10     | UPF0556 protein Q969H8          | 18783  | 0   | 0  |
| C19orf43     | Uncharacterized Q9BQ61          | 18408  | 563 | 22 |
| C1orf167     | Uncharacterized H0Y5F2          | 68415  | 0   | 0  |
| C1QBP        | Complement component C13L3B0    | 31343  | 82  | 1  |



|          |                          |        |      |    |
|----------|--------------------------|--------|------|----|
| C21orf33 | ES1 protein ho H7C1F6    | 27429  | 0    | 0  |
| C2CD4B   | C2 calcium-dep A6NLJ0    | 38745  | 0    | 0  |
| C4A      | Complement C P0C0L4      | 192664 | 0    | 0  |
| C7orf50  | Uncharacterize C9JQV0    | 21870  | 0    | 0  |
| CACNG6   | Voltage-depen Q9BXT2     | 28111  | 0    | 0  |
| CACYBP   | Calcyclin-bindi Q9HB71   | 26194  | 0    | 0  |
| CALCOCO1 | Calcium-bindin Q9P1Z2    | 77289  | 30   | 1  |
| CALM2    | Calmodulin (Fr H0Y7A7    | 20749  | 0    | 0  |
| CALR     | Calreticulin (Fr K7EJB9  | 48112  | 0    | 0  |
| CALU     | Calumenin OS= O43852     | 37084  | 31   | 1  |
| CAND1    | Cullin-associat Q86VP6   | 136289 | 0    | 0  |
| CANX     | Calnexin OS=F B4DGP8     | 71458  | 0    | 0  |
| CAPZA2   | F-actin-cappin P47755    | 32929  | 0    | 0  |
| CAPZB    | Capping protei B1AK87    | 29277  | 0    | 0  |
| CARHSP1  | Calcium-regula Q9Y2V2    | 15882  | 0    | 0  |
| CASP14   | Caspase-14 OS= P31944    | 27662  | 0    | 0  |
| CBR1     | Carbonyl reduc B4DFK7    | 18750  | 0    | 0  |
| CBX1     | Chromobox prc J3KS05     | 20115  | 0    | 0  |
| CBX3     | Chromobox prc Q13185     | 20798  | 0    | 0  |
| CBX5     | Chromobox prc P45973     | 22211  | 0    | 0  |
| CCAR1    | Cell division cy F5H1H2  | 132739 | 1961 | 56 |
| CCAR2    | Cell cycle and t H0YB24  | 68881  | 0    | 0  |
| CCDC58   | Coiled-coil don Q4VC31   | 16609  | 0    | 0  |
| CCDC86   | Coiled-coil don B4DY99   | 12735  | 0    | 0  |
| CCNK     | Cyclin-K OS=F G3V5E1     | 43377  | 31   | 1  |
| CCR9     | C-C chemokine P51686     | 41987  | 0    | 0  |
| CCT2     | T-complex prot F5GWF6    | 57452  | 0    | 0  |
| CCT4     | T-complex prot P50991    | 57888  | 0    | 0  |
| CCT5     | T-complex prot B4DYD8    | 49495  | 0    | 0  |
| CCT6A    | T-complex prot B4DPJ8    | 54833  | 0    | 0  |
| CCT7     | T-complex prot F5GZK5    | 59329  | 0    | 0  |
| CCT8     | T-complex prot B4DEM7    | 57608  | 0    | 0  |
| CD2BP2   | CD2 antigen cy O95400    | 37623  | 49   | 1  |
| CDC5L    | Cell division cy Q99459  | 92194  | 0    | 0  |
| CDK1     | Cyclin-depende E5RIU6    | 21724  | 0    | 0  |
| CEBPZ    | CCAAT/enhanc Q03701      | 120898 | 0    | 0  |
| CENPB    | Major centrom P07199     | 65132  | 0    | 0  |
| CENPV    | Isoform 3 of Ce Q7Z7K6-3 | 29927  | 0    | 0  |
| CEP85    | Centrosomal pr Q6P2H3    | 85586  | 31   | 2  |

|          |                 |        |        |      |     |
|----------|-----------------|--------|--------|------|-----|
| CEP85L   | Centrosomal p   | Q5SZL2 | 91751  | 0    | 0   |
| CFL1     | Cofilin 1 (Non- | G3V1A4 | 16801  | 0    | 0   |
| CGGBP1   | CGG triplet rep | Q9UFW8 | 18809  | 0    | 0   |
| CHCHD3   | Coiled-coil-hel | G3V1K1 | 15549  | 0    | 0   |
| CHD4     | Chromodomair    | F5GWX5 | 216967 | 308  | 8   |
| CHD8     | Chromodomair    | H0YJG4 | 101664 | 0    | 0   |
| CHERP    | Calcium homec   | J3QK89 | 104868 | 1622 | 187 |
| CHN1     | N-chimaerin O   | B8ZZ96 | 31322  | 0    | 0   |
| CHTOP    | Chromatin targ  | Q9Y3Y2 | 26380  | 0    | 0   |
| CIRBP    | Cold-inducible  | B4E2X2 | 28342  | 20   | 0   |
| CIRH1A   | Cirhin (Fragme  | H3BSH7 | 77894  | 0    | 0   |
| CISD2    | CDGSH iron-su   | I3L1N9 | 5141   | 0    | 0   |
| CKAP4    | Cytoskeleton-a  | Q07065 | 65983  | 0    | 0   |
| CKAP5    | Cytoskeleton-a  | Q14008 | 225352 | 14   | 0   |
| CKB      | Creatine kinas  | H0YJG0 | 42617  | 0    | 0   |
| CLASP2   | CLIP-associati  | B3KR06 | 49127  | 0    | 0   |
| CLTC     | Clathrin heavy  | Q00610 | 191493 | 0    | 0   |
| CMAS     | N-acylneurami   | F5H296 | 9190   | 0    | 0   |
| CNIH4    | Protein cornich | A6NLH6 | 15760  | 0    | 0   |
| CNPY2    | Protein canopy  | F8VXJ7 | 19040  | 0    | 0   |
| CNTNAP4  | Contactin-assc  | F5H107 | 139833 | 0    | 0   |
| COIL     | Coilin OS=Hon   | P38432 | 62570  | 0    | 0   |
| COLGALT1 | Procollagen ga  | M0QX72 | 71590  | 0    | 0   |
| COMT     | Catechol O-me   | E7EMS6 | 24822  | 0    | 0   |
| COPA     | Coatomer sub    | P53621 | 138258 | 0    | 0   |
| COPB1    | Coatomer sub    | E9PP73 | 55502  | 0    | 0   |
| COPB2    | Coatomer prot   | B4DZI8 | 98984  | 0    | 0   |
| COPE     | Coatomer prot   | M0QXB4 | 36901  | 0    | 0   |
| COPZ1    | Coatomer sub    | F8VS17 | 18363  | 0    | 0   |
| CORO1C   | Coronin OS=H    | B4E3S0 | 41577  | 0    | 0   |
| COX17    | Cytochrome c    | C9J8T6 | 10846  | 0    | 0   |
| COX4I1   | Cytochrome c    | C13073 | 19564  | 0    | 0   |
| COX5A    | Cytochrome c    | H3BNX8 | 17224  | 0    | 0   |
| COX5B    | Cytochrome c    | C10606 | 13687  | 0    | 0   |
| COX6B1   | Cytochrome c    | K7EQD3 | 4781   | 0    | 0   |
| COX7A2   | Cytochrome c    | H0UI06 | 12836  | 0    | 0   |
| CPA5     | Carboxypeptid   | Q8WXQ8 | 49005  | 30   | 1   |
| CPSF1    | Cleavage and    | Q10570 | 160782 | 264  | 6   |
| CPSF2    | Cleavage and    | Q9P2I0 | 88431  | 186  | 4   |

|             |                             |        |     |   |
|-------------|-----------------------------|--------|-----|---|
| CPSF3       | Cleavage and p G5E9W3       | 73430  | 76  | 2 |
| CPSF4       | Cleavage and p B7Z7B0       | 21942  | 0   | 0 |
| CPSF6       | Cleavage and p F8WJN3       | 52238  | 219 | 5 |
| CPSF7       | Cleavage and p F5H669       | 41241  | 304 | 6 |
| CPVL        | Probable serine Q9H3G5      | 54129  | 292 | 7 |
| CRBN        | Protein cereblon J3QT87     | 45424  | 59  | 1 |
| CRNKL1      | Crooked neck-like Q5JY65    | 99111  | 79  | 1 |
| CROCC       | Rootletin (Frag B1AKD8      | 149087 | 0   | 0 |
| CRTAP       | Cartilage-associated O75718 | 46532  | 313 | 8 |
| CS          | Citrate synthase B4DJV2     | 50400  | 0   | 0 |
| CSE1L       | Exportin-2 OS= B4DUC5       | 110346 | 0   | 0 |
| CSNK2A1     | Casein kinase I E7EU96      | 45282  | 0   | 0 |
| CSNK2B-LY6G | Chimera CSNK Q5SRQ3         | 26656  | 0   | 0 |
| CSTA        | Cystatin-A OS= C9J0E4       | 7082   | 0   | 0 |
| CSTB        | Cystatin-B OS= P04080       | 11133  | 0   | 0 |
| CSTF2       | Cleavage stimulator E7EWR4  | 62902  | 0   | 0 |
| CTNND1      | Catenin delta-1 C9JZR2      | 104784 | 0   | 0 |
| CTSD        | Cathepsin D ligand H7C1V0   | 20359  | 0   | 0 |
| CTTN        | Src substrate c H7C314      | 25079  | 0   | 0 |
| CTTNBP2     | Cortactin-binding H0Y448    | 125549 | 1   | 1 |
| CYB5B       | Cytochrome b5 H3BUX2        | 15707  | 0   | 0 |
| CYB5R3      | NADH-cytochrome B1AHF3      | 16686  | 0   | 0 |
| CYCS        | Cytochrome c (C9JFR7        | 11326  | 0   | 0 |
| DAD1        | Dolichyl-diphosphate F5GXX5 | 9548   | 0   | 0 |
| DAPP1       | Dual adapter for J3KNB3     | 30156  | 11  | 1 |
| DARS        | Aspartate--tRNA C9J7S3      | 19957  | 0   | 0 |
| DAZAP1      | DAZ-associated K7EQ02       | 24789  | 0   | 0 |
| DBI         | Acyl-CoA-binding P07108     | 10038  | 0   | 0 |
| DBN1        | Drebrin (Fragr D6RFI1       | 13428  | 0   | 0 |
| DCAF13      | DDB1- and CU Q9NV06         | 51369  | 0   | 0 |
| DCAKD       | Dephospho-Co K7ESP4         | 24162  | 0   | 0 |
| DCD         | Dermcidin OS= P81605        | 11277  | 0   | 0 |
| DCUN1D5     | DCN1-like protein H0YCN4    | 22918  | 0   | 0 |
| DCXR        | L-xylulose reductase J3KRZ4 | 23945  | 0   | 0 |
| DDB1        | DNA damage-binding Q16531   | 126887 | 132 | 2 |
| DDOST       | Dolichyl-diphosphate U3KQ84 | 46548  | 0   | 0 |
| DDT         | D-dopachrome J3KQ18         | 14184  | 0   | 0 |
| DDX1        | ATP-dependent Q92499        | 82380  | 170 | 4 |
| DDX17       | Probable ATP- H3BLZ8        | 80389  | 192 | 5 |

|             |                        |        |      |     |
|-------------|------------------------|--------|------|-----|
| DDX18       | ATP-dependen Q9NVP1    | 75359  | 0    | 0   |
| DDX21       | Nucleolar RNA Q9NR30   | 87290  | 46   | 1   |
| DDX23       | Probable ATP- Q9BUQ8   | 95524  | 0    | 0   |
| DDX24       | ATP-dependen G3V529    | 91424  | 0    | 0   |
| DDX27       | Probable ATP- Q96GQ7   | 89779  | 0    | 0   |
| DDX31       | Probable ATP- F8WAJ0   | 80895  | 0    | 0   |
| DDX39       | ATP-dependen B1Q2N1    | 30469  | 11   | 0   |
| DDX39A      | ATP-dependen O00148    | 49098  | 0    | 0   |
| DDX39B      | Spliceosome R B4DIJ6   | 48794  | 0    | 0   |
| DDX3X       | ATP-dependen O00571    | 73198  | 0    | 0   |
| DDX3Y       | Uncharacterize B4DXX7  | 72886  | 140  | 3   |
| DDX46       | Probable ATP- Q7L014   | 117290 | 31   | 1   |
| DDX5        | Probable ATP- J3KTA4   | 69044  | 0    | 0   |
| DDX50       | ATP-dependen Q9BQ39    | 82514  | 0    | 0   |
| DDX54       | ATP-dependen Q8TDD1    | 98534  | 0    | 0   |
| DDX55       | ATP-dependen F5H5U2    | 65149  | 0    | 0   |
| DENR        | Density-regula F8VVL1  | 17759  | 0    | 0   |
| DHCR7       | 7-dehydrocholε E9PIP9  | 12078  | 0    | 0   |
| DHX15       | Putative pre-m O43143  | 90875  | 1456 | 223 |
| DHX30       | Putative ATP-c H7BXY3  | 130469 | 55   | 1   |
| DHX36       | Probable ATP- F5GZS0   | 113016 | 0    | 0   |
| DHX9        | ATP-dependen Q08211    | 140869 | 0    | 0   |
| DIABLO      | Diablo homolog F5GXT8  | 15243  | 0    | 0   |
| DIDO1       | Death-inducer Q9BTC0   | 243723 | 0    | 0   |
| DKC1        | H/ACA ribonuc O60832   | 57638  | 0    | 0   |
| DKFZp781K13 | NADH dehydro Q5H9R2    | 13554  | 0    | 0   |
| DLD         | Dihydrolipoyl d B4DHG0 | 43560  | 0    | 0   |
| DNAJA1      | DnaJ homolog P31689    | 44839  | 0    | 0   |
| DNAJA3      | DnaJ homolog E7ES32    | 33061  | 44   | 1   |
| DNAJC10     | DnaJ homolog Q8IXB1    | 91021  | 0    | 2   |
| DNAJC2      | DnaJ homolog Q99543    | 71952  | 0    | 0   |
| DNAJC8      | DnaJ homolog O75937    | 29823  | 704  | 30  |
| DNAJC9      | DnaJ homolog Q8WXX5    | 29891  | 0    | 0   |
| DNTTIP2     | Deoxynucleotic J3KP30  | 66135  | 0    | 0   |
| DOLPP1      | Dolichyldiphos Q86YN1  | 27013  | 0    | 0   |
| DPM3        | Dolichol-phosp Q9P2X0  | 10087  | 0    | 0   |
| DPY30       | Protein dpy-30 Q9C005  | 11243  | 0    | 0   |
| DPYSL5      | Dihydropyrimid E7EWB4  | 20853  | 0    | 0   |
| DRAP1       | Dr1-associatec C9JCC6  | 23190  | 0    | 0   |

|          |                         |        |      |    |
|----------|-------------------------|--------|------|----|
| DSG1     | Desmoglein-1 (Q02413    | 113676 | 43   | 1  |
| DSP      | Desmoplakin CP15924     | 331569 | 0    | 0  |
| DUT      | Deoxyuridine 5 H0YKC5   | 23724  | 0    | 0  |
| DYNC1H1  | Cytoplasmic dy Q14204   | 532072 | 1706 | 36 |
| DYNLL2   | Dynein light ch Q96FJ2  | 10343  | 37   | 1  |
| DYNLRB1  | Dynein light ch B1AKR6  | 16242  | 0    | 0  |
| EBNA1BP2 | EBNA1 binding H7C2Q8    | 40659  | 0    | 0  |
| EBP      | 3-beta-hydroxy Q15125   | 26336  | 0    | 0  |
| ECH1     | Delta(3,5)-Delt Q13011  | 35793  | 0    | 0  |
| ECHS1    | Enoyl-CoA hyd P30084    | 31367  | 0    | 0  |
| ECI1     | Enoyl-CoA delt H3BS70   | 32795  | 0    | 0  |
| EDF1     | Endothelial diff O60869 | 16359  | 0    | 0  |
| EEF1A1   | Elongation fact Q5JR01  | 15926  | 44   | 1  |
| EEF1A1P5 | Putative elongæ Q5VTE0  | 50153  | 0    | 0  |
| EEF1A2   | Elongation fact Q05639  | 50438  | 0    | 0  |
| EEF1B2   | Elongation fact P24534  | 24748  | 0    | 0  |
| EEF1D    | Elongation fact H0YCK7  | 22934  | 0    | 0  |
| EEF1E1   | Eukaryotic tran H0YAL7  | 15330  | 0    | 0  |
| EEF1G    | Elongation fact B4DTG2  | 56114  | 0    | 0  |
| EEF2     | Elongation fact P13639  | 95277  | 0    | 0  |
| EFCAB4B  | EF-hand calciu H0YFI5   | 13969  | 0    | 0  |
| EFTUD2   | 116 kDa U5 srr K7EJ81   | 108215 | 145  | 2  |
| EIF1AY   | Eukaryotic tran A6NJH9  | 14446  | 0    | 0  |
| EIF3A    | Eukaryotic tran F5H335  | 162537 | 0    | 0  |
| EIF3K    | Eukaryotic tran B7ZAM9  | 24468  | 0    | 0  |
| EIF4A1   | Eukaryotic initi P60842 | 46125  | 0    | 0  |
| EIF4A3   | Eukaryotic initi P38919 | 46841  | 0    | 0  |
| EIF4B    | Eukaryotic tran B4DS13  | 69657  | 0    | 0  |
| EIF4E    | Eukaryotic tran H0Y8J7  | 18455  | 0    | 0  |
| EIF4G1   | Eukaryotic tran E7EUU4  | 171535 | 0    | 0  |
| EIF4H    | Eukaryotic tran Q15056  | 27368  | 0    | 0  |
| EIF5A    | Eukaryotic tran I3L397  | 16108  | 0    | 0  |
| EIF6     | Eukaryotic tran P56537  | 26582  | 0    | 0  |
| ELAVL1   | ELAV-like prot B4DVB8   | 38972  | 0    | 0  |
| EMD      | Emerin OS=Ho P50402     | 28976  | 0    | 0  |
| EMG1     | Ribosomal RN/V9GYP5     | 26581  | 0    | 0  |
| ENO1     | Alpha-enolase P06733    | 47139  | 0    | 0  |
| ENO2     | Enolase OS=H F5H0C8     | 34741  | 0    | 0  |
| ENY2     | Transcription a Q9NPA8  | 11521  | 101  | 2  |

|              |                  |          |        |     |   |
|--------------|------------------|----------|--------|-----|---|
| EP400        | E1A-binding pr   | Q96L91   | 343276 | 36  | 1 |
| EPB41L2      | Band 4.1-like p  | Q6ZSX4   | 22715  | 0   | 0 |
| ERH          | Enhancer of ru   | P84090   | 12251  | 12  | 0 |
| ERLIN2       | Erlin-2 (Fragm   | ε E5RHW4 | 37701  | 0   | 0 |
| ERP29        | Endoplasmic r    | ε P30040 | 28975  | 0   | 0 |
| ETFA         | Electron transf  | H0YK49   | 30202  | 0   | 0 |
| ETFB         | Electron transf  | P38117   | 27826  | 0   | 0 |
| EWSR1        | RNA-binding p    | B0QYK0   | 64889  | 0   | 0 |
| EXOSC10      | Exosome comp     | Q01780   | 100768 | 0   | 0 |
| EXOSC4       | Exosome comp     | E9PI41   | 28395  | 0   | 0 |
| EXOSC5       | Exosome comp     | M0R050   | 21243  | 0   | 0 |
| EXOSC6       | Exosome comp     | Q5RKV6   | 28218  | 0   | 0 |
| EZR          | Ezrin OS=Hom     | E7EQR4   | 69370  | 0   | 0 |
| FABP5        | Fatty acid-bind  | Q01469   | 15155  | 0   | 0 |
| FAM103A1     | RNMT-activati    | Q9BTL3   | 14373  | 0   | 0 |
| FAM124B      | Protein FAM12    | Q9H5Z6   | 50929  | 33  | 1 |
| FAM136A      | Protein FAM13    | E7EQY1   | 26758  | 0   | 0 |
| FAM160A1     | Protein FAM16    | Q05DH4   | 116547 | 0   | 0 |
| FAM184B      | Protein FAM18    | Q9ULE4   | 120969 | 0   | 0 |
| FAM188B      | Protein FAM18    | Q4G0A6   | 84319  | 40  | 1 |
| FAM213A      | Redox-regulat    | c Q9BRX8 | 25747  | 0   | 0 |
| FAM98A       | Protein FAM98    | B4DT23   | 34066  | 39  | 1 |
| FARP2        | FERM, RhoGEF     | F5GZ84   | 72217  | 37  | 1 |
| FASN         | Fatty acid synt  | P49327   | 273254 | 0   | 0 |
| FAU          | 40S ribosomal    | E9PR30   | 10898  | 0   | 0 |
| FBL          | rRNA 2~-O-me     | P22087   | 33763  | 164 | 3 |
| FBLL1        | rRNA/tRNA 2~     | R4GMW7   | 34782  | 86  | 2 |
| FCF1         | Chromosome 1     | G3V1S4   | 21933  | 0   | 0 |
| FEN1         | Flap endonucle   | I3L3E9   | 17899  | 0   | 0 |
| FHL1         | Four and a half  | Q5JXH7   | 23310  | 0   | 0 |
| FICD         | Adenosine mor    | J3KP49   | 19252  | 0   | 0 |
| FIP1L1       | Pre-mRNA 3~-     | Q6UN15   | 66487  | 63  | 1 |
| FKBP10       | Peptidyl-prolyl  | K7ELI6   | 18858  | 0   | 0 |
| FKBP12-Exip2 | Peptidyl-prolyl  | Q1JUQ5   | 10112  | 0   | 0 |
| FKBP3        | Peptidyl-prolyl  | Q00688   | 25161  | 0   | 0 |
| FKBP8        | Peptidyl-prolyl  | J3KQ73   | 47114  | 0   | 0 |
| FLG          | Filaggrin OS=    | F P20930 | 434922 | 9   | 0 |
| FLG2         | Filaggrin-2 OS=  | Q5D862   | 247928 | 0   | 0 |
| FLII         | Protein flightle | Q13045   | 144659 | 0   | 0 |

|         |                        |        |     |    |
|---------|------------------------|--------|-----|----|
| FLNA    | Filamin-A OS= Q5HY54   | 276378 | 0   | 0  |
| FMR1    | Fragile X ment: G3V0J0 | 66745  | 0   | 0  |
| FNBP4   | Formin-binding Q8N3X1  | 110198 | 30  | 1  |
| FTTH1   | Ferritin OS=Hc G3V192  | 17643  | 0   | 0  |
| FTSJ3   | pre-rRNA proc: Q8IY81  | 96499  | 0   | 0  |
| FUBP1   | Far upstream e B4DT31  | 69821  | 0   | 0  |
| FUBP3   | Far upstream e Q96I24  | 61602  | 0   | 0  |
| FUS     | RNA-binding p H3BPE7   | 53465  | 32  | 26 |
| FXR2    | Fragile X ment: P51116 | 74178  | 0   | 0  |
| GANAB   | Neutral alpha-ξ F5H6X6 | 106807 | 0   | 0  |
| GAPDH   | Glyceraldehyde E7EUT5  | 36030  | 0   | 0  |
| GAR1    | H/ACA ribonuc Q9NY12   | 22334  | 0   | 0  |
| GATAD2B | Transcriptional Q8WXI9 | 65220  | 0   | 0  |
| GCN1L1  | Translational a Q92616 | 292572 | 141 | 3  |
| GDI2    | Rab GDP disso Q5SX86   | 17771  | 0   | 0  |
| GEMIN2  | Gem-associate H0YDP6   | 22112  | 0   | 0  |
| GIPC1   | PDZ domain-c: O14908   | 36027  | 0   | 0  |
| GIPC2   | PDZ domain-c: Q8TF65   | 34333  | 19  | 0  |
| GJA8    | Gap junction al P48165 | 48199  | 30  | 1  |
| GLO1    | Lactoylglutathi Q04760 | 20764  | 0   | 0  |
| GLRX5   | Glutaredoxin-r: Q86SX6 | 16618  | 0   | 0  |
| GMPS    | GMP synthase F8W720    | 65887  | 0   | 0  |
| GNA12   | Guanine nucle: Q03113  | 44251  | 0   | 0  |
| GNAS    | Guanine nucle: Q5JWF2  | 110956 | 0   | 0  |
| GNB1    | Guanine nucle: B1AKQ8  | 12277  | 0   | 0  |
| GNB2L1  | Guanine nucle: H0Y8W2  | 30244  | 0   | 0  |
| GNG12   | Guanine nucle: Q9UBI6  | 8001   | 0   | 0  |
| GNG5    | Guanine nucle: P63218  | 7314   | 0   | 0  |
| GNL2    | Nucleolar GTP· Q13823  | 83603  | 0   | 0  |
| GNL3    | Guanine nucle: Q9BVP2  | 61954  | 0   | 0  |
| GNL3L   | Guanine nucle: Q9NVN8  | 65532  | 0   | 0  |
| GOT2    | Aspartate amin E7ERW2  | 43002  | 0   | 0  |
| GPI     | Glucose-6-pho K7EQ48   | 53368  | 0   | 0  |
| GRB2    | Growth factor r P62993 | 25190  | 71  | 2  |
| GRM1    | Metabotropic g F8W805  | 101407 | 0   | 0  |
| GRN     | Paragranulin (F K7EKL3 | 41321  | 0   | 0  |
| GRPEL1  | GrpE protein h: Q9HAV7 | 24264  | 0   | 0  |
| GSTO1   | Glutathione S-† P78417 | 27548  | 0   | 0  |
| GSTP1   | Glutathione S-† A8MX94 | 19468  | 0   | 0  |

|            |                         |        |     |   |
|------------|-------------------------|--------|-----|---|
| GTF2I      | General transcri P78347 | 112346 | 12  | 1 |
| GTF3C1     | General transcri Q12789 | 238725 | 0   | 0 |
| GTPBP4     | Nucleolar GTP Q9BZE4    | 73918  | 0   | 0 |
| H1FO       | Histone H1.0 CP07305    | 20850  | 0   | 0 |
| H1FX       | Histone H1x OS Q92522   | 22474  | 0   | 0 |
| H2AFX      | Histone H2AX IP16104    | 15135  | 0   | 0 |
| H2AFY      | Core histone m O75367   | 39592  | 0   | 0 |
| H2AFY2     | Core histone m Q9P0M6   | 40033  | 0   | 0 |
| H2AFZ      | Histone H2A.Z P0C0S5    | 13545  | 0   | 0 |
| H3F3A      | Histone H3 OS B4DEB1    | 14044  | 102 | 3 |
| H3F3B      | Histone H3 (Fr K7EK07   | 14905  | 0   | 0 |
| HBA2       | HCG1745306, i G3V1N2    | 11940  | 0   | 0 |
| HBD        | Hemoglobin su E9PFT6    | 15410  | 0   | 0 |
| HBE1       | Hemoglobin su A8MUF7    | 9464   | 0   | 0 |
| HCFC1      | HCF N-terminε A6NEM2    | 213343 | 0   | 0 |
| HDAC2      | Histone deacet B3KRS5   | 51965  | 48  | 1 |
| HDAC4      | Histone deacet F5GX36   | 72986  | 0   | 0 |
| HEATR1     | HEAT repeat-c Q9H583    | 242215 | 0   | 0 |
| HES6       | Transcription c H7C020  | 17010  | 0   | 0 |
| HINT1      | Histidine triad P49773  | 13793  | 0   | 0 |
| HINT2      | Histidine triad Q9BX68  | 17151  | 0   | 0 |
| HIST1H1A   | Histone H1.1 C Q02539   | 21829  | 0   | 0 |
| HIST1H1C   | Histone H1.2 CP16403    | 21352  | 0   | 0 |
| HIST1H1D   | Histone H1.3 CP16402    | 22336  | 0   | 0 |
| HIST1H1E   | Histone H1.4 CP10412    | 21852  | 0   | 0 |
| HIST1H2AA  | Histone H2A ty Q96QV6   | 14225  | 0   | 0 |
| HIST1H2AC  | Histone H2A ty Q93077   | 14097  | 0   | 0 |
| HIST1H2AD  | Histone H2A ty P20671   | 14099  | 0   | 0 |
| HIST1H2AG  | Histone H2A ty P0C0S8   | 14083  | 67  | 3 |
| HIST1H2BJ  | Histone H2B ty P06899   | 13896  | 0   | 0 |
| HIST1H2BL  | Histone H2B ty Q99880   | 13944  | 0   | 0 |
| HIST1H2BN  | Histone H2B O U3KQK0    | 18792  | 86  | 2 |
| HIST1H4A   | Histone H4 OS P62805    | 11360  | 0   | 1 |
| HIST2H2AA3 | Histone H2A ty Q6FI13   | 14087  | 0   | 0 |
| HIST2H2AB  | Histone H2A ty Q8IUE6   | 13987  | 0   | 0 |
| HIST2H3PS2 | Histone H3 OS Q5TEC6    | 15421  | 0   | 0 |
| HIST3H2A   | Histone H2A ty Q7L7L0   | 14113  | 0   | 0 |
| HIST3H2BB  | Histone H2B ty Q8N257   | 13900  | 0   | 0 |
| HMG20A     | High mobility g Q9NP66  | 40119  | 0   | 0 |



|           |                          |        |      |     |
|-----------|--------------------------|--------|------|-----|
| HMGA1     | High mobility g H7BYM6   | 34274  | 0    | 0   |
| HMGB1     | High mobility g Q5T7C4   | 24878  | 0    | 0   |
| HMGB2     | High mobility g D6R9A6   | 24019  | 0    | 0   |
| HNRNPA0   | Heterogeneous Q13151     | 30822  | 127  | 13  |
| HNRNPA1   | Heterogeneous F8W6I7     | 38723  | 0    | 17  |
| HNRNPA2B1 | Heterogeneous P22626     | 37407  | 403  | 151 |
| HNRNPA3   | Heterogeneous P51991     | 39571  | 0    | 0   |
| HNRNPAB   | Heterogeneous D6R9P3     | 30284  | 78   | 12  |
| HNRNPC    | Heterogeneous G3V4C1     | 33550  | 373  | 8   |
| HNRNPD    | Heterogeneous Q14103     | 38410  | 87   | 13  |
| HNRNPDL   | Heterogeneous O14979     | 46409  | 27   | 0   |
| HNRNPF    | Heterogeneous P52597     | 45643  | 54   | 3   |
| HNRNPH1   | Heterogeneous H0YB39     | 51197  | 79   | 18  |
| HNRNPH2   | Heterogeneous P55795     | 49232  | 0    | 0   |
| HNRNPH3   | Isoform 2 of Hε P31942-2 | 36903  | 232  | 75  |
| HNRNPK    | Heterogeneous Q5T6W5     | 50944  | 0    | 0   |
| HNRNPL    | Heterogeneous M0QXS5     | 64092  | 0    | 0   |
| HNRNPM    | Heterogeneous P52272     | 77464  | 847  | 27  |
| HNRNPR    | Heterogeneous S4R3J4     | 70899  | 354  | 8   |
| HNRNPU    | Heterogeneous Q00839     | 90528  | 19   | 0   |
| HNRNPUL1  | Heterogeneous M0QYI8     | 95679  | 0    | 0   |
| HNRNPUL2  | Heterogeneous Q1KMD3     | 85052  | 574  | 19  |
| HOXB9     | Homeobox prot P17482     | 28041  | 0    | 0   |
| HP1BP3    | Heterochromat Q5SSJ5     | 61169  | 0    | 0   |
| HPRT1     | Hypoxanthine-; P00492    | 24564  | 0    | 0   |
| HRNR      | Hornerin OS=F Q86YZ3     | 282228 | 0    | 0   |
| HSD17B10  | 3-hydroxyacyl- Q5H928    | 26906  | 0    | 0   |
| HSD17B12  | Estradiol 17-be Q53GQ0   | 34302  | 0    | 0   |
| HSD17B4   | Peroxisomal m E7ER27     | 53894  | 0    | 0   |
| HSP90AA1  | Full-length cDf Q86U12   | 84607  | 0    | 0   |
| HSP90AB1  | Heat shock pro P08238    | 83212  | 0    | 0   |
| HSP90AB2P | Putative heat s Q58FF8   | 44321  | 0    | 0   |
| HSP90B1   | Endoplasmin OP14625      | 92411  | 0    | 0   |
| HSPA1A    | Heat shock 70 P08107     | 70009  | 0    | 0   |
| HSPA1L    | Heat shock 70 P34931     | 70331  | 0    | 0   |
| HSPA4     | Heat shock 70 P34932     | 94271  | 0    | 0   |
| HSPA5     | 78 kDa glucoseε P11021   | 72288  | 97   | 5   |
| HSPA6     | Heat shock 70 P17066     | 70984  | 46   | 0   |
| HSPA8     | Heat shock coξ E9PI65    | 70854  | 1019 | 27  |

|          |                           |        |     |    |
|----------|---------------------------|--------|-----|----|
| HSPA9    | Stress-70 prote P38646    | 73635  | 429 | 25 |
| HSPD1    | 60 kDa heat sh P10809     | 61016  | 0   | 0  |
| HSPE1    | 10 kDa heat sh P61604     | 10925  | 0   | 0  |
| HTATSF1  | HIV Tat-specifi Q5H918    | 27727  | 0   | 0  |
| HYPK     | Huntingtin-inte J3QT56    | 9243   | 0   | 0  |
| IARS     | Isoleucine--trI J3KR24    | 131680 | 0   | 0  |
| IGF2BP1  | Insulin-like gro Q9NZI8   | 63441  | 0   | 0  |
| IGHG1    | Ig gamma-1 ch P01857      | 36083  | 32  | 1  |
| IGHG2    | Ig gamma-2 ch P01859      | 35878  | 7   | 1  |
| IGLC2    | Ig lambda-2 ch P0CG05     | 11287  | 0   | 0  |
| IGLL5    | Immunoglobuli B9A064      | 23049  | 88  | 2  |
| IK       | Protein Red (F D6REL4     | 24742  | 34  | 1  |
| ILF2     | Interleukin enh Q12905    | 43035  | 633 | 17 |
| ILF3     | Interleukin enh K7ELV3    | 95748  | 553 | 18 |
| IMMT     | Mitochondrial i B9A067    | 78925  | 0   | 0  |
| IMP3     | U3 small nucle Q9NV31     | 21837  | 0   | 0  |
| IMP4     | U3 small nucle H0Y714     | 31926  | 0   | 0  |
| ING5     | Inhibitor of gro Q8WYH8   | 27733  | 0   | 0  |
| INO80    | DNA helicase I H0YMN5     | 127886 | 32  | 1  |
| IQGAP2   | Ras GTPase-ac E7EWC2      | 160235 | 0   | 0  |
| IREB2    | Iron-responsiv P48200     | 104978 | 74  | 3  |
| IRGC     | Interferon-indu Q6NXR0    | 50257  | 0   | 0  |
| IRS4     | Insulin recepto O14654    | 133685 | 0   | 0  |
| ITPRIPL2 | Inositol 1,4,5-tri Q3MIP1 | 58409  | 9   | 0  |
| JAGN1    | Protein jagunal Q8N5M9    | 21111  | 0   | 0  |
| JUP      | Junction plako P14923     | 81693  | 0   | 0  |
| KATNAL2  | Katanin p60 A1K7EIJ8      | 38097  | 0   | 0  |
| KBTD3    | Kelch repeat a G3V161     | 60637  | 1   | 0  |
| KCNK1    | Potassium cha Q5T5E6      | 27513  | 0   | 0  |
| KCTD6    | BTB/POZ dom Q8NC69        | 27592  | 0   | 0  |
| KDELR1   | ER lumen prote Q8NBW7     | 24526  | 0   | 0  |
| KHDRBS1  | KH domain-cor Q07666      | 48197  | 47  | 1  |
| KHSRP    | Far upstream e M0R0I5     | 73070  | 0   | 0  |
| KIAA0020 | Pumilio domair Q15397     | 73538  | 0   | 0  |
| KIAA0408 | Uncharacterize H3BRB8     | 33371  | 31  | 1  |
| KIAA1429 | Protein virilizer Q69YN4  | 201898 | 0   | 0  |
| KIF5A    | Kinesin heavy J3KNA1      | 107187 | 0   | 0  |
| KLHL22   | Kelch-like prot B7Z2G1    | 55532  | 0   | 0  |
| KM-PA-2  | Ribosome biog Q96Q25      | 71885  | 0   | 0  |

|           |                  |         |        |      |    |
|-----------|------------------|---------|--------|------|----|
| KPNB1     | Importin subun   | Q14974  | 97108  | 0    | 0  |
| KRR1      | KRR1 small sul   | Q13601  | 43638  | 0    | 0  |
| KTN1      | Kinectin OS=H    | Q86UP2  | 156179 | 0    | 0  |
| LAMA4     | Laminin subun    | H0YAP9  | 20794  | 0    | 0  |
| LAMA5     | Laminin subun    | O15230  | 399479 | 32   | 1  |
| LANCL1    | LanC-like prote  | F8WDS9  | 9277   | 41   | 1  |
| LAS1L     | Ribosomal bio    | Q9Y4W2  | 83013  | 0    | 0  |
| LBR       | Lamin-B recep    | Q14739  | 70658  | 0    | 0  |
| LDHA      | L-lactate dehy   | F5GXY2  | 36665  | 0    | 0  |
| LDHAL6B   | L-lactate dehy   | Q9BYZ2  | 41916  | 0    | 0  |
| LDHB      | L-lactate dehy   | A8MW50  | 36615  | 0    | 0  |
| LEMD2     | LEM domain-c     | D6R958  | 5903   | 0    | 0  |
| LEPRE1    | Prolyl 3-hydrox  | Q32P28  | 83341  | 517  | 10 |
| LEPREL4   | Synaptonemal     | K7EJ03  | 9536   | 0    | 0  |
| LGALS3BP  | Galectin-3-bin   | Q08380  | 65289  | 0    | 0  |
| LGI1      | Leucine-rich gl  | O95970  | 63777  | 0    | 0  |
| LIG3      | DNA ligase 3     | CP49916 | 112835 | 0    | 0  |
| LIMA1     | LIM domain an    | Q9UHB6  | 85173  | 0    | 0  |
| LIMCH1    | LIM and calpor   | H0Y8P3  | 103438 | 0    | 0  |
| LINC00479 | Putative uncha   | Q96M42  | 15199  | 0    | 0  |
| LLPH      | Protein LLP ho   | Q9BRT6  | 15215  | 0    | 0  |
| LMNA      | Prelamin-A/C     | P02545  | 74095  | 74   | 2  |
| LMNB1     | Lamin-B1 OS=     | P20700  | 66368  | 1103 | 21 |
| LMNB2     | Lamin B2, isofo  | J9JID7  | 69906  | 232  | 5  |
| LOC646903 | LOC646903 pro    | Q96EG4  | 15828  | 0    | 0  |
| LRMP      | Processed lym    | F5H006  | 50394  | 3    | 0  |
| LRPPRC    | Leucine-rich     | PI42704 | 157805 | 0    | 0  |
| LRRC27    | Leucine-rich re  | H0Y4N5  | 29196  | 0    | 0  |
| LRRC59    | Leucine-rich re  | Q96AG4  | 34909  | 0    | 0  |
| LSM2      | U6 snRNA-ass     | Q9Y333  | 10828  | 0    | 0  |
| LSM3      | U6 snRNA-ass     | P62310  | 11838  | 0    | 0  |
| LSM4      | U6 snRNA-ass     | U3KQK1  | 13796  | 0    | 0  |
| LSM6      | U6 snRNA-ass     | P62312  | 9122   | 0    | 0  |
| LSM7      | U6 snRNA-ass     | K7EML7  | 6934   | 0    | 0  |
| LUC7L2    | Putative RNA-t   | Q9Y383  | 46486  | 0    | 0  |
| LUC7L3    | Cisplatin resist | J3KPP4  | 58185  | 127  | 4  |
| LYAR      | Cell growth-re   | Q9NX58  | 43588  | 0    | 0  |
| MACF1     | Microtubule-ac   | H3BPE1  | 856346 | 0    | 0  |
| MAGEC1    | MAGEC1 prote     | A0PK03  | 23732  | 0    | 0  |

|           |                         |        |     |    |
|-----------|-------------------------|--------|-----|----|
| MAGOH     | Mago-nashi ho B1ARP8    | 12836  | 0   | 0  |
| MAGOHB    | Protein mago n Q96A72   | 17265  | 0   | 0  |
| MAK16     | Protein MAK16 H0YBV6    | 16653  | 0   | 0  |
| MAP1A     | MAP1 light cha J3KPX8   | 305484 | 0   | 0  |
| MAP1B     | Microtubule-as P46821   | 270468 | 116 | 3  |
| MAP4      | Microtubule-as E7EVA0   | 245292 | 0   | 0  |
| MAPRE1    | Microtubule-as Q15691   | 29980  | 0   | 0  |
| MAPRE2    | Microtubule-as K7EL66   | 15026  | 0   | 0  |
| MATR3     | Matrin-3 (Frag D6R991   | 88305  | 257 | 6  |
| MBD3      | Methyl-CpG bin K7EIE8   | 26306  | 0   | 0  |
| MCM3      | DNA replication B4DWW4  | 95848  | 0   | 0  |
| MCM5      | DNA replication B1AHA9  | 25928  | 0   | 0  |
| MCOLN3    | Mucolipin 3, iso B1ANB7 | 37219  | 0   | 0  |
| MDC1      | Mediator of DN Q14676   | 226529 | 0   | 0  |
| MDH2      | Malate dehydr G3XAL0    | 35481  | 0   | 0  |
| MDN1      | Midasin OS=H Q9NU22     | 632420 | 538 | 13 |
| MEAF6     | Chromatin moc Q9HAF1    | 21622  | 0   | 0  |
| MEN1      | Menin OS=Hor E7EN32     | 61381  | 0   | 0  |
| MERTK     | Tyrosine-prote E9PHX8   | 90964  | 0   | 0  |
| MEX3A     | RNA-binding p A1L020    | 54139  | 42  | 1  |
| MGST1     | Microsomal gl P10620    | 17587  | 0   | 0  |
| MGST2     | Microsomal gl Q99735    | 16610  | 0   | 0  |
| MGST3     | Microsomal gl Q5VV87    | 14370  | 0   | 0  |
| MIF       | Macrophage m P14174     | 12468  | 0   | 0  |
| MKI67     | Antigen KI-67 (P46013   | 358474 | 0   | 0  |
| MOB1B     | MOB kinase ac Q7L9L4    | 25075  | 0   | 0  |
| MOB2      | MOB kinase ac Q70IA6    | 26909  | 0   | 0  |
| MOGS      | Mannosyl-oligc Q13724   | 91861  | 52  | 1  |
| MOV10     | Mov10, Molone Q5JR04    | 107142 | 70  | 1  |
| MPDU1     | Mannose-P-do I3L1D2     | 6475   | 0   | 0  |
| MPHOSPH10 | U3 small nucle O00566   | 78816  | 0   | 0  |
| MPHOSPH6  | M-phase phos H3BNK8     | 6732   | 0   | 0  |
| MRE11A    | Double-strand B3KTC7    | 81020  | 0   | 0  |
| MRPL10    | 39S ribosomal Q7Z7H8    | 29264  | 0   | 0  |
| MRPL11    | 39S ribosomal Q9Y3B7    | 20670  | 0   | 0  |
| MRPL17    | 39S ribosomal E9PKV2    | 16361  | 0   | 0  |
| MRPL21    | 39S ribosomal H3BUY0    | 21513  | 0   | 0  |
| MRPL22    | 39S ribosomal J3KQY1    | 26458  | 35  | 1  |
| MRPL23    | 39S ribosomal A6NJD9    | 18518  | 0   | 0  |

|         |                        |        |     |   |
|---------|------------------------|--------|-----|---|
| MRPL38  | 39S ribosomal B3KN96   | 22957  | 0   | 0 |
| MRPS10  | 28S ribosomal P82664   | 22985  | 0   | 0 |
| MRPS16  | 28S ribosomal B4E032   | 13820  | 0   | 0 |
| MRPS17  | 28S ribosomal I3L0E3   | 25704  | 0   | 0 |
| MRPS2   | 28S ribosomal Q5T8A0   | 30460  | 0   | 0 |
| MRPS21  | 28S ribosomal P82921   | 10734  | 0   | 0 |
| MRPS23  | 28S ribosomal J3QLR8   | 17506  | 0   | 0 |
| MRPS28  | 28S ribosomal Q9Y2Q9   | 20830  | 0   | 0 |
| MRPS35  | 28S ribosomal P82673   | 36821  | 51  | 1 |
| MRT04   | mRNA turnover Q9UKD2   | 27543  | 0   | 0 |
| MSH2    | DNA mismatch E9PHA6    | 103122 | 0   | 0 |
| MSH6    | DNA mismatch P52701    | 152689 | 144 | 4 |
| MSN     | Moesin OS=Hc P26038    | 67778  | 0   | 0 |
| MT-CO2  | Cytochrome c c P00403  | 25548  | 0   | 0 |
| MTA1    | Metastasis-ass E7ESY4  | 79323  | 0   | 0 |
| MTA2    | Metastasis-ass O94776  | 74976  | 0   | 0 |
| MTHFD1  | C-1-tetrahydro F5H2F4  | 110544 | 0   | 0 |
| MTPN    | Myotrophin OS C9JL85   | 5701   | 0   | 0 |
| MXRA8   | Matrix-remode B3KTR6   | 47942  | 0   | 0 |
| MYBBP1A | Myb-binding pr Q9BQG0  | 148762 | 154 | 3 |
| MYCBP   | C-Myc-binding Q99417   | 11959  | 0   | 0 |
| MYEF2   | Myelin express Q9P2K5  | 64081  | 117 | 2 |
| MYH10   | Myosin-10 OS= F8W6L6   | 230635 | 33  | 1 |
| MYH11   | Myosin-11 OS= P35749   | 227199 | 0   | 0 |
| MYH14   | Myosin-14 OS= F2Z2U8   | 231075 | 0   | 0 |
| MYH7    | Myosin-7 OS=IP12883    | 222959 | 32  | 1 |
| MYH9    | Myosin-9 OS=IP35579    | 226392 | 0   | 0 |
| MYL12A  | Myosin regulat J3QRS3  | 20444  | 0   | 0 |
| MYL6    | Myosin light pc G3V1V0 | 18026  | 0   | 0 |
| MYO1B   | Unconventiona E9PDF6   | 128400 | 0   | 0 |
| MYO1C   | Unconventiona F5H6E2   | 118920 | 0   | 0 |
| MYO1D   | Unconventiona J3QRN6   | 111219 | 0   | 0 |
| NAA38   | N-alpha-acetyl F2Z2Y6  | 7367   | 0   | 0 |
| NACA    | Nascent polype H0YHX9  | 22930  | 0   | 0 |
| NAP1L1  | Nucleosome as H0YH88   | 21065  | 0   | 0 |
| NASP    | Nuclear autoar P49321  | 85186  | 0   | 0 |
| NAT10   | N-acetyltransfe Q9H0A0 | 115657 | 0   | 0 |
| NAT14   | N-acetyltransfe M0R1E3 | 17831  | 0   | 0 |
| NCBP1   | Nuclear cap-bi Q09161  | 91781  | 0   | 0 |

|           |                         |        |     |   |
|-----------|-------------------------|--------|-----|---|
| NCBP2     | Nuclear cap-bi F8WE41   | 6195   | 0   | 0 |
| NCL       | Nucleolin OS=IP19338    | 76568  | 0   | 0 |
| NCOA5     | Nuclear recept Q9HCD5   | 65496  | 0   | 0 |
| NDUFA4    | NADH dehydro O00483     | 9364   | 0   | 0 |
| NDUFA6    | NADH dehydro R4GN43     | 8504   | 0   | 0 |
| NDUFS3    | NADH dehydro O75489     | 30223  | 0   | 0 |
| NDUFS7    | NADH dehydro B3KRI2     | 22188  | 0   | 0 |
| NEDD8     | NEDD8 OS=Hc Q15843      | 9066   | 0   | 0 |
| NENF      | Neudesin OS= Q9UMX5     | 18845  | 0   | 0 |
| NGDN      | Neuroguidin (F H0YJ17   | 30040  | 0   | 0 |
| NHP2      | H/ACA ribonuc Q9NX24    | 17190  | 0   | 0 |
| NHP2L1    | NHP2-like prot P55769   | 14165  | 0   | 0 |
| NIFK      | MKI67 FHA do Q9BYG3     | 34201  | 0   | 0 |
| NIP7      | 60S ribosome ε Q9Y221   | 20450  | 0   | 0 |
| NKRF      | NF-kappa-B-ε O15226     | 77624  | 199 | 4 |
| NLE1      | Notchless prot K7ERN7   | 13709  | 0   | 0 |
| NME1      | Nucleoside dip P15531   | 17138  | 0   | 0 |
| NME1-NME2 | Nucleoside dip F6XY72   | 32621  | 0   | 0 |
| NME2      | Nucleoside dip P22392   | 17287  | 0   | 0 |
| NME3      | Nucleoside dip Q13232   | 19003  | 182 | 4 |
| NME4      | Nucleoside dip F2Z2X0   | 25444  | 31  | 1 |
| NMNAT1    | Nicotinamide n Q9HAN9   | 31913  | 0   | 0 |
| NO66      | Bifunctional lys Q9H6W3 | 71041  | 0   | 0 |
| NOC2L     | Nucleolar com Q9Y3T9    | 84866  | 0   | 0 |
| NOC3L     | Nucleolar com A6NJZ9    | 92566  | 0   | 0 |
| NOC4L     | Nucleolar com Q9BVI4    | 58431  | 0   | 0 |
| NOL10     | Nucleolar prote F5H6G7  | 74336  | 0   | 0 |
| NOL11     | Nucleolar prote Q9H8H0  | 81072  | 0   | 0 |
| NOL6      | Nucleolar prote G8JLK7  | 121957 | 0   | 0 |
| NOL7      | Nucleolar prote Q9UMY1  | 29409  | 0   | 0 |
| NOL9      | Polynucleotide Q5SY16   | 79272  | 0   | 0 |
| NOLC1     | Nucleolar and c Q14978  | 73560  | 0   | 0 |
| NOM1      | Nucleolar MIF4 Q5C9Z4   | 96198  | 0   | 0 |
| NONO      | Non-POU dom C9IZL7      | 54197  | 0   | 0 |
| NOP10     | H/ACA ribonuc Q9NPE3    | 7701   | 0   | 0 |
| NOP14     | Nucleolar prote E9PFK5  | 88810  | 0   | 0 |
| NOP16     | Nucleolar prote Q9Y3C1  | 21175  | 0   | 0 |
| NOP2      | Putative riboso P46087  | 89247  | 0   | 0 |
| NOP56     | Nucleolar prote O00567  | 66009  | 0   | 0 |

|          |                  |           |        |     |    |
|----------|------------------|-----------|--------|-----|----|
| NOP58    | Nucleolar prote  | Q9Y2X3    | 59541  | 0   | 0  |
| NPEPPS   | Puromycin-sen    | B7Z463    | 94456  | 0   | 0  |
| NPM1     | Nucleophosmir    | P06748    | 32555  | 0   | 0  |
| NPM3     | Nucleoplasmin    | O75607    | 19331  | 0   | 0  |
| NSA2     | Ribosome biog    | O95478    | 30047  | 0   | 0  |
| NTMT1    | N-terminal Xae   | Q9BV86    | 25371  | 8   | 0  |
| NUDT16L1 | Protein syndes   | Q9BRJ7    | 23323  | 64  | 2  |
| NUDT21   | Cleavage and p   | H3BND3    | 26211  | 574 | 17 |
| NUMA1    | Isoform 2 of N   | Q14980-2  | 238115 | 105 | 3  |
| NUP107   | Nuclear pore c   | B4DZ67    | 103109 | 0   | 0  |
| NUP133   | Nuclear pore c   | F5H5C2    | 127262 | 0   | 0  |
| NUP153   | Nuclear pore c   | F6QR24    | 157240 | 0   | 0  |
| NUP155   | Nuclear pore c   | E9PF10    | 148000 | 0   | 0  |
| NUP160   | Nuclear pore c   | Q12769    | 162017 | 0   | 0  |
| NUP188   | Nucleoporin N    | Q5SRE5    | 195917 | 0   | 0  |
| NUP205   | Nuclear pore c   | Q92621    | 227776 | 107 | 2  |
| NUP210   | Nuclear pore r   | Q8TEM1    | 204983 | 75  | 2  |
| NUP214   | Nuclear pore c   | P35658    | 213488 | 0   | 0  |
| NUP35    | Nucleoporin N    | B4DYB4    | 33099  | 0   | 0  |
| NUP43    | Nucleoporin N    | Q8NFH3    | 42124  | 0   | 0  |
| NUP62    | Nuclear pore g   | M0QXN5    | 45588  | 0   | 0  |
| NUP85    | Nuclear pore c   | J3KT10    | 70133  | 0   | 0  |
| NUP88    | Nuclear pore c   | J3KMX1    | 78831  | 0   | 0  |
| NUP93    | Nuclear pore c   | Q8N1F7    | 93430  | 0   | 0  |
| NUP98    | Nuclear pore c   | J3KP29    | 177290 | 0   | 0  |
| NUPL1    | Nucleoporin p    | 5Q5JRG1   | 49065  | 0   | 0  |
| NVL      | Nuclear valosir  | O15381    | 94991  | 0   | 0  |
| NXF1     | Nuclear RNA e    | E9PIN3    | 68065  | 0   | 0  |
| OGT      | UDP-N-acetyl     | gO15294   | 116850 | 0   | 0  |
| OLA1     | Obg-like ATPa    | sJ3KQ32   | 46908  | 0   | 0  |
| ORC5     | Origin recogniti | O43913    | 50251  | 0   | 0  |
| OTUD4    | OTU domain c     | cG3V0I6   | 123968 | 0   | 0  |
| P4HB     | Uncharacterize   | F5H8J2    | 57081  | 0   | 0  |
| PA2G4    | Proliferation-a  | sF8VR77   | 43759  | 0   | 0  |
| PABPC1   | Polyadenylate-   | H0YAP2    | 65706  | 0   | 0  |
| PAFAH1B2 | Platelet-activa  | IJ3KNE3   | 18345  | 0   | 0  |
| PAK1IP1  | p21-activated    | pQ9NWT1   | 43936  | 0   | 0  |
| PAN3     | Isoform 2 of P   | AQ58A45-2 | 64424  | 0   | 0  |
| PARK7    | Protein DJ-1 O   | K7ELW0    | 17898  | 0   | 0  |

|        |                         |        |     |    |
|--------|-------------------------|--------|-----|----|
| PARP1  | Poly [ADP-ribo P09874   | 113012 | 0   | 0  |
| PAXBP1 | PAX3- and PAX9Y5B6      | 104739 | 0   | 0  |
| PBRM1  | Protein polybrc E7EVG2  | 168399 | 33  | 1  |
| PCBD1  | Pterin-4-alpha P61457   | 11992  | 0   | 0  |
| PCBP1  | Poly(rC)-bindin Q15365  | 37474  | 100 | 2  |
| PCBP2  | Poly(RC) bindin G3V0E8  | 33475  | 0   | 0  |
| PCID2  | PCI domain-co Q5JVF3    | 46000  | 0   | 0  |
| PCMT1  | Protein-L-isoa: J3KP72  | 30296  | 0   | 0  |
| PCNA   | Proliferating ce P12004 | 28750  | 0   | 0  |
| PCNP   | PEST proteolyt Q8WW12   | 18913  | 565 | 23 |
| PCNXL4 | Pecanex-like p H0YJN3   | 13206  | 0   | 0  |
| PDCD11 | Protein RRP5 h Q14690   | 208570 | 0   | 0  |
| PDCD5  | Programmed c B4DE64     | 14988  | 0   | 0  |
| PDCD6  | Programmed c O75340     | 21855  | 242 | 5  |
| PDHB   | Pyruvate dehyd F8WF02   | 27633  | 0   | 0  |
| PDIA3  | Thioredoxin (F) H7BZJ3  | 54929  | 0   | 0  |
| PDIA4  | Protein disulfid P13667 | 72887  | 0   | 0  |
| PDIA6  | Protein disulfid B5MCQ5 | 53228  | 0   | 0  |
| PDS5B  | Sister chromati Q9NTI5  | 164563 | 0   | 0  |
| PEBP1  | Phosphatidylet P30086   | 21044  | 0   | 0  |
| PEF1   | Peflin OS=Hon Q9UBV8    | 30361  | 0   | 0  |
| PELP1  | Proline-, glutar I3L3A8 | 124865 | 55  | 1  |
| PES1   | Pescadillo hom B5MCF9   | 66036  | 0   | 0  |
| PEX6   | Peroxin Pex6p Q8WYQ0    | 77694  | 12  | 0  |
| PFDN2  | Prefoldin subu Q9UHV9   | 16638  | 0   | 0  |
| PFKFB3 | 6-phosphofruc H0Y483    | 52551  | 0   | 0  |
| PFN1   | Profilin-1 OS=IP07737   | 15045  | 0   | 0  |
| PFN2   | Profilin OS=Hc G5E9Q6   | 20773  | 0   | 0  |
| PGAM1  | Phosphoglycer P18669    | 28786  | 0   | 0  |
| PGAM2  | Phosphoglycer P15259    | 28748  | 0   | 0  |
| PGAM5  | Serine/threonin Q96HS1  | 31985  | 0   | 0  |
| PGK1   | Phosphoglycer B7Z7A9    | 41402  | 0   | 0  |
| PGRMC1 | Membrane-ass B7Z1L3     | 15869  | 0   | 0  |
| PHB    | Prohibitin (Fra E7ESE2  | 26875  | 0   | 0  |
| PHB2   | Prohibitin-2 OSJ3KPX7   | 33382  | 0   | 0  |
| PHF5A  | PHD finger-like Q7RTV0  | 12397  | 155 | 41 |
| PHGDH  | D-3-phosphogl Q5SZU1    | 53051  | 0   | 0  |
| PHIP   | PH-interacting Q8WWQ0   | 206560 | 0   | 0  |
| PIN1   | Peptidyl-prolyl K7EN45  | 9938   | 0   | 0  |



|         |                          |        |     |   |
|---------|--------------------------|--------|-----|---|
| PIN4    | Peptidyl-prolyl Q9Y237   | 13801  | 0   | 0 |
| PIP     | Prolactin-induc P12273   | 16562  | 0   | 0 |
| PKM     | Pyruvate kinas H3BQ34    | 30701  | 0   | 0 |
| PLEC    | Isoform 2 of Pl Q15149-2 | 531466 | 0   | 0 |
| PLOD1   | Procollagen-lys B4DR87   | 88217  | 416 | 7 |
| PLOD3   | Procollagen-lys O60568   | 84731  | 155 | 3 |
| PLRG1   | Pleiotropic regl A8MW61  | 57146  | 0   | 0 |
| PNN     | Pinin OS=Hom Q9H307      | 81565  | 0   | 0 |
| PN01    | RNA-binding p Q9NRX1     | 27907  | 0   | 0 |
| POFUT2  | GDP-fucose pr Q9Y2G5     | 49944  | 0   | 0 |
| POGZ    | Pogo transposæ Q7Z3K3    | 155245 | 0   | 0 |
| POLDIP3 | Polymerase de B4DMM2     | 20211  | 0   | 0 |
| POLG2   | DNA polymeras Q9UHN1     | 54876  | 26  | 1 |
| POLR2A  | DNA-directed f P24928    | 217039 | 68  | 1 |
| POLR2B  | DNA-directed f C9J2Y9    | 132971 | 0   | 0 |
| POLR2C  | DNA-directed f P19387    | 31422  | 42  | 1 |
| POLR2D  | DNA-directed f E9PB93    | 12259  | 0   | 0 |
| POLR2E  | DNA-directed f P19388    | 24536  | 0   | 0 |
| POLR2H  | DNA-directed f C9JBj6    | 12950  | 61  | 1 |
| POLR2K  | DNA-directed f P53803    | 6999   | 0   | 0 |
| POLR2L  | DNA-directed f P62875    | 7640   | 0   | 0 |
| PPA1    | Inorganic pyroç Q5SQT6   | 19969  | 0   | 0 |
| PPA2    | Inorganic pyroç H0Y9D8   | 25619  | 0   | 0 |
| PPAN    | HCG2033702, i A8MV53     | 47116  | 0   | 0 |
| PPHLN1  | Periphilin-1 (Fr F8VPY7  | 19327  | 0   | 0 |
| PPIA    | Peptidyl-prolyl F8WE65   | 18001  | 0   | 0 |
| PPIB    | Peptidyl-prolyl P23284   | 23728  | 61  | 2 |
| PPIF    | Peptidyl-prolyl P30405   | 22026  | 0   | 0 |
| PPIH    | Peptidyl-prolyl C9JQD4   | 15790  | 39  | 1 |
| PPIL1   | Peptidyl-prolyl Q9Y3C6   | 18225  | 0   | 0 |
| PPP1CA  | Serine/threonin E9PMD7   | 28879  | 0   | 0 |
| PPP1CC  | Serine/threonin F8VYE8   | 34927  | 0   | 0 |
| PPP2R1A | Serine/threonin B3KQV6   | 45575  | 0   | 0 |
| PPP2R2A | Serine/threonin E5RFR9   | 22992  | 0   | 0 |
| PRADC1  | Protease-assoç Q9BSG0    | 21029  | 0   | 0 |
| PRAF2   | PRA1 family pr A6NP52    | 19246  | 0   | 0 |
| PRC1    | Protein regulat H0YL53   | 23061  | 3   | 1 |
| PRDX1   | Peroxiredoxin-1 Q06830   | 22096  | 0   | 0 |
| PRDX2   | Peroxiredoxin-1 P32119   | 21878  | 0   | 0 |

|         |                        |        |      |    |
|---------|------------------------|--------|------|----|
| PRDX3   | Thioredoxin-de E9PH29  | 25822  | 0    | 0  |
| PRDX4   | Peroxiredoxin-H7C3T4   | 30521  | 0    | 0  |
| PRDX5   | Peroxiredoxin-P30044   | 22073  | 0    | 0  |
| PRDX6   | Peroxiredoxin-P30041   | 25019  | 0    | 0  |
| PRKCSH  | Glucosidase 2-K7EJ70   | 60154  | 0    | 0  |
| PRKDC   | DNA-depender P78527    | 468788 | 534  | 10 |
| PRMT1   | Protein arginin-H0YDE4 | 27003  | 0    | 0  |
| PRMT5   | Protein arginin-O14744 | 72638  | 0    | 0  |
| PRPF19  | Pre-mRNA-pro Q9UMS4    | 55146  | 79   | 1  |
| PRPF3   | U4/U6 small n-B4DSY9   | 31869  | 30   | 1  |
| PRPF31  | U4/U6 small n-E7ESA8   | 55421  | 0    | 0  |
| PRPF39  | Pre-mRNA-pro Q86UA1    | 78381  | 221  | 5  |
| PRPF4   | U4/U6 small n-O43172   | 58412  | 43   | 1  |
| PRPF40A | Pre-mRNA-pro O75400    | 108737 | 0    | 0  |
| PRPF6   | Pre-mRNA-pro O94906    | 106858 | 161  | 3  |
| PRPF8   | Pre-mRNA-pro Q6P2Q9    | 273427 | 1900 | 45 |
| PRPS1   | Ribose-phosph B1ALA9   | 24068  | 0    | 0  |
| PRSS3   | Trypsin-3 (Fraß B1AN99 | 19389  | 0    | 0  |
| PRSS33  | Serine proteas-I3L3D7  | 25382  | 0    | 0  |
| PSAP    | Saposin-D OS- B1AVU8   | 61652  | 0    | 0  |
| PSIP1   | PC4 and SFRS O75475    | 60067  | 0    | 0  |
| PSMA1   | Proteasome su F5GX11   | 26488  | 0    | 0  |
| PSMA2   | Proteasome su H3BT36   | 5007   | 0    | 0  |
| PSMA3   | Proteasome su P25788   | 28415  | 0    | 0  |
| PSMA4   | Proteasome su H0YKS0   | 20062  | 0    | 0  |
| PSMA5   | Proteasome su P28066   | 26394  | 0    | 0  |
| PSMA8   | Proteasome su Q8TAA3   | 28512  | 0    | 0  |
| PSMB1   | Proteasome su P20618   | 26472  | 0    | 0  |
| PSMB5   | Proteasome su P28074   | 28462  | 0    | 0  |
| PSMB6   | Proteasome su P28072   | 25341  | 0    | 0  |
| PSMC1   | 26S protease r-B4DR63  | 41141  | 0    | 0  |
| PSMD10  | 26S proteasom B1AJY5   | 20204  | 0    | 0  |
| PSMD8   | 26S proteasom R4GMR5   | 32531  | 0    | 0  |
| PSPC1   | Paraspeckle cc Q8WXF1  | 58706  | 0    | 0  |
| PTBP1   | Polypyrimidine K7EK45  | 57186  | 0    | 0  |
| PTBP2   | Polypyrimidine B4DI28  | 59583  | 0    | 0  |
| PTBP3   | Polypyrimidine O95758  | 59652  | 0    | 0  |
| PTGES3  | Prostaglandin IB4DDC6  | 14563  | 0    | 0  |
| PTMA    | Thymosin alph-H7C2N1   | 15849  | 0    | 0  |

|          |                          |        |      |    |
|----------|--------------------------|--------|------|----|
| PTS      | 6-pyruvoyl tetra E9PNN3  | 8908   | 0    | 0  |
| PUF60    | Poly(U)-bindin H0YEM1    | 35810  | 0    | 0  |
| PWP2     | Periodic trypto Q15269   | 102387 | 0    | 0  |
| PYCR1    | Pyrroline-5-car J3KQ22   | 26423  | 0    | 0  |
| PYROXD2  | Pyridine nuclec Q8N2H3   | 63027  | 0    | 0  |
| QIL1     | Protein QIL1 O Q5XKP0    | 13079  | 0    | 0  |
| QPCT     | Glutaminy-pep Q16769     | 40851  | 0    | 0  |
| RAB10    | Ras-related pro P61026   | 22527  | 0    | 0  |
| RAB11A   | Ras-related pro H3BMH2   | 17657  | 0    | 0  |
| RAB15    | Ras-related pro P59190   | 24375  | 22   | 0  |
| RAB33B   | Ras-related pro Q9H082   | 25701  | 19   | 0  |
| RAB35    | Ras-related pro F5H157   | 21201  | 22   | 0  |
| RAB3GAP2 | Rab3 GTPase-i Q9H2M9     | 155886 | 0    | 0  |
| RAB4B    | HCG1995540, i Q6PIK3     | 13528  | 0    | 0  |
| RAB5A    | Ras-related pro B4DJA5   | 22164  | 0    | 0  |
| RAB5C    | Ras-related pro P51148   | 23468  | 0    | 0  |
| RAB6A    | Ras-related pro H0YGL6   | 22746  | 19   | 0  |
| RAB7A    | Ras-related pro C9IZZ0   | 13067  | 0    | 0  |
| RAB8B    | Ras-related pro H0YMN7   | 10478  | 104  | 2  |
| RAD50    | DNA repair pro Q92878    | 153797 | 0    | 0  |
| RAD52    | Isoform beta of P43351-2 | 24524  | 0    | 0  |
| RAE1     | mRNA export f. P78406    | 40942  | 0    | 0  |
| RALY     | RNA-binding p Q9UKM9     | 32444  | 89   | 2  |
| RALYL    | RNA-binding R B3KT61     | 31055  | 0    | 0  |
| RAN      | GTP-binding n H0YFC6     | 26799  | 0    | 0  |
| RANBP1   | Ran-specific G C9JDM3    | 23296  | 0    | 0  |
| RANBP2   | E3 SUMO-prot P49792      | 357974 | 148  | 3  |
| RANGAP1  | Ran GTPase-a F8W7I9      | 57738  | 0    | 0  |
| RAP1B    | Ras-related pro F5GWU8   | 15737  | 0    | 0  |
| RB1CC1   | RB1-inducible Q8TDY2     | 182975 | 49   | 1  |
| RBBP4    | Histone-bindin H0YCT5    | 47626  | 93   | 2  |
| RBBP5    | Retinoblastom Q15291     | 59116  | 40   | 1  |
| RBBP7    | Histone-bindin E9PC52    | 46909  | 0    | 0  |
| RBM10    | Isoform 3 of R P98175-3  | 103469 | 1403 | 62 |
| RBM12B   | RNA-binding p Q8IXT5     | 118030 | 0    | 0  |
| RBM14    | RNA-binding p Q96PK6     | 69449  | 551  | 12 |
| RBM15    | Putative RNA-l Q96T37    | 107124 | 92   | 2  |
| RBM17    | Splicing factor Q5W010   | 44934  | 1190 | 75 |
| RBM20    | RNA-binding p Q5T481     | 134274 | 0    | 0  |

|        |                        |        |      |    |
|--------|------------------------|--------|------|----|
| RBM25  | RNA-binding p P49756   | 100124 | 0    | 0  |
| RBM28  | RNA-binding p H7C5G8   | 21267  | 0    | 0  |
| RBM3   | Putative RNA-l P98179  | 17160  | 0    | 0  |
| RBM34  | RNA-binding p P42696   | 48535  | 0    | 0  |
| RBM39  | RNA-binding p E1P5S2   | 40516  | 277  | 6  |
| RBM4   | RNA-binding p E9PB51   | 26270  | 95   | 2  |
| RBM45  | RNA-binding p Q8IUH3   | 53469  | 71   | 1  |
| RBM5   | RNA-binding p C9J9P7   | 92097  | 1819 | 45 |
| RBM6   | RNA-binding p B4DNY1   | 113859 | 182  | 5  |
| RBM8A  | RNA-binding p Q9Y5S9   | 19877  | 0    | 0  |
| RBMX   | RNA-binding rr P38159  | 42306  | 353  | 21 |
| RBMXL1 | RNA binding m Q96E39   | 42116  | 276  | 14 |
| RCC1   | Regulator of ch C9JW69 | 39559  | 0    | 0  |
| RCC2   | Protein RCC2 C Q9P258  | 56049  | 0    | 0  |
| RCL1   | RCL1 OS=Horr Q5VZU1    | 40817  | 0    | 0  |
| RCN1   | Reticulocalbin- B7Z1M1 | 33006  | 156  | 3  |
| RCN2   | Reticulocalbin- H0YL43 | 17709  | 51   | 1  |
| RCOR1  | REST corepres J3KN32   | 53295  | 0    | 0  |
| RECQL  | ATP-dependen P46063    | 73410  | 0    | 0  |
| REEP5  | Receptor expre E2QRG8  | 18109  | 0    | 0  |
| REM1   | GTP-binding pI O75628  | 32927  | 0    | 0  |
| REXO4  | RNA exonucleæ Q9GZR2   | 46643  | 0    | 0  |
| RFC1   | Replication fac P35251 | 128175 | 0    | 0  |
| RFC2   | Replication fac P35250 | 39132  | 0    | 0  |
| RFC4   | Replication fac C9JZI1 | 36854  | 0    | 0  |
| RFC5   | Replication fac P40937 | 38472  | 0    | 0  |
| RGPD3  | RanBP2-like ar J3KNE0  | 198270 | 0    | 0  |
| RGPD4  | RanBP2-like ar J3KNY6  | 198072 | 0    | 0  |
| RGS3   | Regulator of G- B3KUB2 | 66436  | 0    | 0  |
| RHCE   | Blood group Rr H0YCJ8  | 8389   | 0    | 0  |
| RHEB   | GTP-binding pI C9J931  | 8668   | 0    | 0  |
| RHOC   | Rho-related G1Q5JR08   | 21566  | 0    | 0  |
| RIF1   | Telomere-asso Q5UIP0   | 274294 | 0    | 0  |
| RMDN1  | Regulator of m H0YBD9  | 18414  | 0    | 0  |
| RNF123 | E3 ubiquitin-pr Q5XPI4 | 148420 | 0    | 0  |
| RNF13  | E3 ubiquitin-pr C9J8T4 | 17918  | 0    | 0  |
| RNF216 | E3 ubiquitin-pr Q9NWF9 | 99342  | 0    | 0  |
| RNPS1  | RNA-binding p H3BMM9   | 31681  | 0    | 0  |
| ROCK2  | Rho-associatec D6REE7  | 50695  | 0    | 0  |

|         |                 |        |        |     |   |
|---------|-----------------|--------|--------|-----|---|
| RP1     | Oxygen-regulat  | P56715 | 240511 | 36  | 1 |
| RPA1    | Replication pro | P27694 | 68095  | 0   | 0 |
| RPA2    | Replication pro | Q5TEJ7 | 19421  | 0   | 0 |
| RPA3    | Replication pro | B5MC59 | 9165   | 0   | 0 |
| RPF2    | Ribosome prod   | Q9H7B2 | 35560  | 0   | 0 |
| RPL10   | 60S ribosomal   | F8W7C6 | 18580  | 0   | 0 |
| RPL10A  | 60S ribosomal   | P62906 | 24816  | 0   | 0 |
| RPL10L  | 60S ribosomal   | Q96L21 | 24503  | 0   | 0 |
| RPL11   | 60S ribosomal   | P62913 | 20240  | 0   | 0 |
| RPL12   | 60S ribosomal   | P30050 | 17808  | 0   | 0 |
| RPL13   | 60S ribosomal   | P26373 | 24247  | 174 | 4 |
| RPL13A  | 60S ribosomal   | P40429 | 23562  | 0   | 0 |
| RPL14   | 60S ribosomal   | P50914 | 23417  | 0   | 0 |
| RPL15   | 60S ribosomal   | P61313 | 24131  | 0   | 0 |
| RPL17   | 60S ribosomal   | J3KRX5 | 20158  | 121 | 3 |
| RPL18   | 60S ribosomal   | G3V203 | 18962  | 0   | 0 |
| RPL18A  | 60S ribosomal   | M0R1A7 | 18067  | 0   | 0 |
| RPL19   | Ribosomal prot  | J3KTE4 | 23233  | 0   | 0 |
| RPL21   | 60S ribosomal   | M0R181 | 14140  | 0   | 0 |
| RPL22   | 60S ribosomal   | K7EJT5 | 10416  | 0   | 0 |
| RPL23   | 60S ribosomal   | J3KT29 | 14856  | 2   | 0 |
| RPL23A  | 60S ribosomal   | P62750 | 17792  | 102 | 2 |
| RPL24   | 60S ribosomal   | C9JNW5 | 17532  | 110 | 2 |
| RPL26   | 60S ribosomal   | P61254 | 17248  | 108 | 3 |
| RPL26L1 | 60S ribosomal   | E5RIT6 | 15197  | 0   | 0 |
| RPL27   | 60S ribosomal   | P61353 | 16460  | 183 | 5 |
| RPL27A  | 60S ribosomal   | E9PLL6 | 12194  | 49  | 1 |
| RPL28   | 60S ribosomal   | P46779 | 19060  | 67  | 2 |
| RPL3    | 60S ribosomal   | P39023 | 46080  | 0   | 0 |
| RPL30   | 60S ribosomal   | E5RI99 | 12648  | 128 | 4 |
| RPL31   | 60S ribosomal   | B7Z4C8 | 15109  | 17  | 0 |
| RPL32   | 60S ribosomal   | D3YTB1 | 15607  | 0   | 0 |
| RPL34   | 60S ribosomal   | P49207 | 13284  | 0   | 0 |
| RPL35   | 60S ribosomal   | F2Z388 | 10638  | 52  | 1 |
| RPL35A  | 60S ribosomal   | P18077 | 12530  | 0   | 0 |
| RPL36   | 60S ribosomal   | Q9Y3U8 | 12246  | 0   | 0 |
| RPL36A  | 60S ribosomal   | H0Y5B4 | 15291  | 0   | 0 |
| RPL37A  | 60S ribosomal   | P61513 | 10268  | 0   | 0 |
| RPL38   | 60S ribosomal   | J3KT73 | 7560   | 65  | 1 |

|             |                         |       |     |   |
|-------------|-------------------------|-------|-----|---|
| RPL4        | 60S ribosomal P36578    | 47667 | 0   | 0 |
| RPL5        | 60S ribosomal P46777    | 34341 | 0   | 0 |
| RPL6        | 60S ribosomal Q02878    | 32708 | 42  | 1 |
| RPL7        | 60S ribosomal P18124    | 29207 | 0   | 0 |
| RPL7A       | 60S ribosomal P62424    | 29977 | 0   | 0 |
| RPL7L1      | 60S ribosomal Q6DKI1    | 28643 | 0   | 0 |
| RPL8        | 60S ribosomal P62917    | 28007 | 0   | 0 |
| RPL9        | 60S ribosomal H0Y9V9    | 21557 | 0   | 0 |
| RPLP0       | 60S acidic ribo: P05388 | 34252 | 70  | 1 |
| RPLP1       | 60S acidic ribo: P05386 | 11507 | 23  | 0 |
| RPLP2       | 60S acidic ribo: P05387 | 11658 | 0   | 0 |
| RPN1        | Dolichyl-dipho: P04843  | 68527 | 0   | 0 |
| RPN2        | Dolichyl-dipho: F2Z3K5  | 17797 | 0   | 0 |
| RPRD1B      | Regulation of n Q9NQG5  | 36877 | 0   | 0 |
| RPS10       | 40S ribosomal P46783    | 18886 | 5   | 0 |
| RPS10-NUDT3 | Protein RPS10- S4R435   | 32576 | 0   | 0 |
| RPS11       | 40S ribosomal P62280    | 18419 | 189 | 4 |
| RPS12       | 40S ribosomal P25398    | 14505 | 0   | 0 |
| RPS13       | 40S ribosomal P62277    | 17212 | 190 | 5 |
| RPS14       | 40S ribosomal P62263    | 16263 | 23  | 0 |
| RPS15       | 40S ribosomal K7EJ78    | 17712 | 61  | 1 |
| RPS15A      | 40S ribosomal P62244    | 14830 | 52  | 1 |
| RPS16       | 40S ribosomal M0R210    | 14410 | 92  | 2 |
| RPS17       | 40S ribosomal H0YK46    | 21629 | 0   | 0 |
| RPS17L      | 40S ribosomal P0CW22    | 15540 | 54  | 1 |
| RPS18       | 40S ribosomal P62269    | 17708 | 261 | 5 |
| RPS19       | 40S ribosomal M0QXK4    | 16051 | 56  | 2 |
| RPS19BP1    | Active regulato Q86WX3  | 15424 | 0   | 0 |
| RPS2        | 40S ribosomal P15880    | 31305 | 241 | 6 |
| RPS20       | 40S ribosomal P60866    | 13364 | 0   | 0 |
| RPS21       | 40S ribosomal Q8WVC2    | 8844  | 0   | 0 |
| RPS23       | 40S ribosomal P62266    | 15798 | 54  | 1 |
| RPS24       | 40S ribosomal E7ETK0    | 15187 | 0   | 0 |
| RPS25       | 40S ribosomal P62851    | 13734 | 2   | 0 |
| RPS26       | 40S ribosomal P62854    | 13007 | 0   | 0 |
| RPS26P11    | Putative 40S ril Q5JNZ5 | 12994 | 31  | 1 |
| RPS27L      | 40S ribosomal H0YMV8    | 11338 | 43  | 1 |
| RPS28       | 40S ribosomal P62857    | 7836  | 0   | 0 |
| RPS29       | 40S ribosomal P62273    | 6672  | 0   | 0 |

|         |                        |        |     |   |
|---------|------------------------|--------|-----|---|
| RPS3    | 40S ribosomal P23396   | 26671  | 0   | 0 |
| RPS3A   | 40S ribosomal P61247   | 29926  | 93  | 2 |
| RPS4X   | 40S ribosomal P62701   | 29579  | 17  | 1 |
| RPS5    | 40S ribosomal M0R0F0   | 22377  | 2   | 0 |
| RPS6    | 40S ribosomal P62753   | 28663  | 0   | 0 |
| RPS7    | 40S ribosomal P62081   | 22113  | 0   | 0 |
| RPS8    | 40S ribosomal Q5JR95   | 21866  | 0   | 0 |
| RPS9    | 40S ribosomal P46781   | 22578  | 47  | 1 |
| RPSA    | 40S ribosomal C9J9K3   | 29487  | 0   | 0 |
| RPSAP58 | 40S ribosomal A6NE09   | 32888  | 0   | 0 |
| RRNAD1  | Protein RRNAC Q4VX71   | 29655  | 0   | 0 |
| RRP1    | Ribosomal RN/ P56182   | 52807  | 0   | 0 |
| RRP12   | RRP12-like pro Q5JTH9  | 143611 | 0   | 0 |
| RRP1B   | Ribosomal RN/ Q14684   | 84375  | 0   | 0 |
| RRP7A   | Ribosomal RN/ Q9Y3A4   | 32314  | 0   | 0 |
| RRP9    | U3 small nucle O43818  | 51809  | 0   | 0 |
| RRS1    | Ribosome biog Q15050   | 41168  | 0   | 0 |
| RSL1D1  | Ribosomal L1 c O76021  | 54939  | 0   | 0 |
| RSL24D1 | Probable ribos Q9UHA3  | 19608  | 0   | 0 |
| RTCB    | tRNA-splicing IQ9Y3I0  | 55175  | 230 | 5 |
| RTN1    | Reticulon OS=IA8MT72   | 21848  | 37  | 1 |
| RTN3    | Reticulon-3 OS O95197  | 112541 | 46  | 1 |
| RTN4    | Reticulon OS=IF8W914   | 37121  | 0   | 0 |
| RUFY2   | RUN and FYVE H0YD93    | 71390  | 36  | 1 |
| RUVBL1  | RuvB-like 1 OS Q9Y265  | 50196  | 0   | 1 |
| RUVBL2  | RuvB-like 2 OS B3KQ59  | 46277  | 48  | 1 |
| RYR1    | Ryanodine rec M0R014   | 100290 | 32  | 1 |
| S100A10 | Protein S100-AP60903   | 11196  | 0   | 0 |
| S100A11 | Protein S100-AP31949   | 11733  | 0   | 0 |
| S100A7  | Protein S100-AP31151   | 11464  | 0   | 0 |
| S100A8  | Protein S100-AP05109   | 10828  | 0   | 0 |
| S100A9  | Protein S100-AP06702   | 13234  | 0   | 0 |
| SAFB    | Scaffold attach Q15424 | 102580 | 342 | 9 |
| SAFB2   | Scaffold attach Q14151 | 107408 | 390 | 9 |
| SAMM50  | Sorting and as A8MZI2  | 28477  | 3   | 3 |
| SAP18   | Histone deacet O00422  | 17550  | 241 | 6 |
| SAR1A   | GTP-binding p Q5SQT8   | 13653  | 0   | 0 |
| SATB2   | DNA-binding p C9JR56   | 75988  | 0   | 0 |
| SCAF8   | Protein SCAF8 B7Z888   | 147254 | 0   | 0 |

|          |                      |          |        |      |     |
|----------|----------------------|----------|--------|------|-----|
| SCGB1D2  | Secretoglobin f      | O95969   | 9918   | 0    | 0   |
| SCP2     | Non-specific li      | P22307   | 58956  | 0    | 0   |
| SDAD1    | Protein SDA1 f       | Q9NVU7   | 79820  | 0    | 0   |
| SEC11A   | SEC11-like 1 (f      | H0YK72   | 18976  | 0    | 0   |
| SEC16A   | Protein transp       | J3KNL6   | 251738 | 34   | 1   |
| SEC22B   | Vesicle-traffic      | K075396  | 24578  | 0    | 0   |
| SEC23A   | Protein transp       | F5H365   | 82916  | 0    | 0   |
| SEC23B   | Protein transp       | Q5QPE1   | 86424  | 87   | 1   |
| SEC24C   | Protein transp       | E7EP00   | 111914 | 0    | 0   |
| SEC61B   | Protein transp       | S4R3B5   | 9968   | 0    | 0   |
| SEC61G   | Protein transp       | P60059   | 7736   | 0    | 0   |
| SEH1L    | Nucleoporin SE       | Q96EE3   | 39623  | 0    | 0   |
| SENP3    | Sentrin-specifi      | J3KNH7   | 64841  | 0    | 0   |
|          | 15-Sep 15 kDa seleno | c O60613 | 17780  | 0    | 0   |
| SERPINH1 | Serpin H1 (Fra       | i E9PIG2 | 17351  | 0    | 0   |
| SET      | Protein SET O        | S Q01105 | 33469  | 0    | 0   |
| SF1      | Splicing factor      | F8WEV5   | 80569  | 754  | 26  |
| SF3A1    | Splicing factor      | F8WB66   | 88831  | 1598 | 106 |
| SF3A2    | Splicing factor      | K7EMT0   | 49224  | 782  | 25  |
| SF3A3    | Splicing factor      | E7EUT8   | 58812  | 1631 | 64  |
| SF3B1    | Splicing factor      | O75533   | 145738 | 2799 | 225 |
| SF3B14   | Pre-mRNA brai        | Q9Y3B4   | 14576  | 161  | 88  |
| SF3B2    | Splicing factor      | E9PPJ0   | 100165 | 2018 | 106 |
| SF3B3    | Splicing factor      | H3BMB0   | 135492 | 2113 | 195 |
| SF3B4    | Splicing factor      | Q15427   | 44357  | 332  | 36  |
| SF3B5    | Splicing factor      | Q9BWJ5   | 10129  | 263  | 29  |
| SFN      | 14-3-3 protein       | P31947   | 27757  | 0    | 0   |
| SFPQ     | Splicing factor,     | P23246   | 76102  | 0    | 0   |
| SFRS3    | Serine/arginine      | c B4E241 | 14194  | 8    | 0   |
| SFSWAP   | Splicing factor,     | Q12872   | 104758 | 90   | 2   |
| SHMT2    | Serine hydroxy       | G3V2Y4   | 25660  | 0    | 0   |
| SHROOM3  | Protein Shroon       | Q8TF72   | 216724 | 0    | 0   |
| SIGMAR1  | Sigma non-opi        | c Q99720 | 25112  | 0    | 0   |
| SKIV2L2  | Superkiller vira     | F5H7E2   | 106746 | 0    | 0   |
| SKP1     | S-phase kinase       | c P63208 | 18708  | 0    | 0   |
| SLC12A7  | Solute carrier f     | Q9Y666   | 119029 | 0    | 0   |
| SLC22A5  | Solute carrier f     | H7C1R8   | 15573  | 34   | 1   |
| SLC25A1  | Tricarboxylate       | P53007   | 33991  | 0    | 0   |
| SLC25A10 | Mitochondrial c      | B4DLN1   | 48069  | 0    | 0   |



|          |                                        |        |      |    |
|----------|----------------------------------------|--------|------|----|
| SLC25A11 | Mitochondrial 13L1P8                   | 32162  | 0    | 0  |
| SLC25A3  | Phosphate carrier F8VVM2               | 36138  | 0    | 0  |
| SLC25A5  | ADP/ATP transporter P05141             | 32831  | 108  | 3  |
| SLC25A6  | ADP/ATP transporter P12236             | 32845  | 0    | 0  |
| SLFN11   | Schlafen family Q7Z7L1                 | 102770 | 0    | 0  |
| SLIRP    | SRA stem-loop H0YJ40                   | 10843  | 0    | 0  |
| SMAD6    | Isoform B of M O43541-2                | 26219  | 0    | 0  |
| SMARCA1  | Probable global P28370                 | 122527 | 0    | 0  |
| SMARCA4  | SMARCA4 isoform Q9HBD4                 | 188031 | 553  | 13 |
| SMARCA5  | SWI/SNF-related O60264                 | 121828 | 0    | 0  |
| SMARCC1  | SWI/SNF complex Q92922                 | 122790 | 0    | 0  |
| SMARCC2  | SWI/SNF complex F8VXC8                 | 136100 | 83   | 2  |
| SMARCE1  | SWI/SNF-related J3QKS7                 | 33413  | 0    | 0  |
| SMC1A    | Structural maintenance Q14683          | 143144 | 116  | 3  |
| SMC1B    | Structural maintenance Q8NDV3          | 143818 | 0    | 0  |
| SMC3     | Structural maintenance Q9UQE7          | 141454 | 0    | 0  |
| SMC4     | Structural maintenance E9PD53          | 144365 | 0    | 0  |
| SMCHD1   | Structural maintenance J3KTL8          | 155549 | 0    | 0  |
| SMNDC1   | Survival of motor O75940               | 26694  | 140  | 2  |
| SMU1     | WD40 repeat-containing Q2TAY7          | 57507  | 71   | 2  |
| SND1     | Staphylococcal Q7KZF4                  | 101934 | 0    | 0  |
| SNRNP200 | U5 small nuclear O75643                | 244353 | 1944 | 40 |
| SNRNP40  | U5 small nuclear B4DQJ1                | 44488  | 0    | 0  |
| SNRNP70  | U1 small nuclear M0QYR1                | 51526  | 109  | 3  |
| SNRPA    | U1 small nuclear M0QXK2                | 31259  | 138  | 15 |
| SNRPA1   | U2 small nuclear P09661                | 28398  | 666  | 83 |
| SNRPB2   | U2 small nuclear P08579                | 25470  | 400  | 69 |
| SNRPC    | U1 small nuclear P09234                | 17381  | 72   | 1  |
| SNRPD1   | Small nuclear ribonucleoprotein P62314 | 13273  | 103  | 23 |
| SNRPD2   | Small nuclear ribonucleoprotein P62316 | 13518  | 354  | 46 |
| SNRPD3   | Small nuclear ribonucleoprotein B4DJP7 | 13283  | 53   | 42 |
| SNRPE    | Small nuclear ribonucleoprotein P62304 | 10797  | 181  | 52 |
| SNRPF    | Small nuclear ribonucleoprotein P62306 | 9719   | 116  | 15 |
| SNRPG    | Small nuclear ribonucleoprotein F5H013 | 8490   | 91   | 23 |
| SNRPN    | Small nuclear ribonucleoprotein B3KVR1 | 25059  | 345  | 27 |
| SNX12    | Sorting nexin-1 Q9UMY4                 | 19718  | 0    | 0  |
| SNX9     | Sorting nexin-9 Q9Y5X1                 | 66550  | 0    | 0  |
| SOD1     | Superoxide dismutase H7BYH4            | 15926  | 0    | 0  |
| SOD2     | Superoxide dismutase B3KUK2            | 19718  | 0    | 0  |

|         |                         |        |      |    |
|---------|-------------------------|--------|------|----|
| SON     | Protein SON O: P18583   | 263664 | 78   | 2  |
| SP140L  | Nuclear body p H7BYP4   | 46190  | 39   | 1  |
| SPIN1   | Spindlin-1 OS= Q9Y657   | 29582  | 0    | 0  |
| SPIN2B  | Spindlin-2B (F: Q5JZB8  | 29140  | 0    | 0  |
| SPTAN1  | Spectrin alpha A6NG51   | 284772 | 0    | 0  |
| SPTBN1  | Spectrin beta c Q01082  | 274439 | 0    | 0  |
| SRCAP   | Helicase SRCA Q6ZRS2    | 343343 | 0    | 0  |
| SRCRB4D | Scavenger rece Q8WTU2   | 60779  | 43   | 1  |
| SRP14   | Signal recognit H0YLA2  | 14561  | 0    | 0  |
| SRP68   | Signal recognit F5H5Y3  | 60247  | 0    | 0  |
| SRP72   | Signal recognit R4GNC1  | 24794  | 0    | 0  |
| SRP9    | Signal recognit E9PE20  | 7663   | 0    | 0  |
| SRPK1   | SRSF protein k H3BLV9   | 75992  | 0    | 0  |
| SRPK2   | SRSF protein k H7C5L6   | 33320  | 0    | 0  |
| SRPRB   | Signal recognit H7C4H2  | 17602  | 0    | 0  |
| SRRM2   | Serine/arginine Q9UQ35  | 299438 | 0    | 0  |
| SRRT    | Serrate RNA ef H7C3A1   | 56698  | 0    | 0  |
| SRSF1   | Serine/arginine J3KTL2  | 28312  | 108  | 2  |
| SRSF10  | Serine/arginine Q5JRI1  | 20900  | 27   | 0  |
| SRSF2   | Serine/arginine J3KP15  | 15518  | 0    | 0  |
| SRSF4   | Serine/arginine S4R2X6  | 17939  | 0    | 0  |
| SRSF5   | Serine/arginine Q13243  | 31245  | 0    | 0  |
| SRSF6   | Serine/arginine Q13247  | 39563  | 0    | 0  |
| SRSF7   | Serine/arginine C9JAB2  | 26912  | 33   | 0  |
| SRSF9   | Serine/arginine Q13242  | 25526  | 266  | 8  |
| SSB     | Lupus La prote P05455   | 46808  | 0    | 0  |
| SSBP1   | Single-strande E7EUY5   | 15703  | 0    | 0  |
| SSR4    | Translocon-ass P51571   | 18987  | 0    | 0  |
| SSRP1   | FACT complex Q08945     | 81024  | 44   | 1  |
| STK17A  | Serine/threonin Q9UEE5  | 46529  | 2    | 0  |
| STK38   | Serine/threonin Q15208  | 54155  | 0    | 0  |
| STK38L  | Serine/threonin Q9Y2H1  | 53968  | 0    | 0  |
| STMN1   | Stathmin (Frag A2A2D0   | 17292  | 0    | 0  |
| STMN2   | Stathmin OS= F E5RGX5   | 19562  | 0    | 0  |
| STOML2  | Stomatin-like p B4E1K7  | 33317  | 0    | 0  |
| STRBP   | Spermatid peri Q96SI9   | 73606  | 55   | 4  |
| STRN4   | Striatin-4 (Frag R4GN16 | 34684  | 0    | 0  |
| SUB1    | Activated RNA P53999    | 14386  | 0    | 0  |
| SUGP1   | SURP and G-p: Q8IWZ8    | 72425  | 1610 | 37 |

|         |                                 |        |     |    |
|---------|---------------------------------|--------|-----|----|
| SULT1A1 | Sulfotransferase H3BRY5         | 32604  | 0   | 0  |
| SUN2    | SUN domain-containing B0QY63    | 25384  | 0   | 0  |
| SUPT16H | FACT complex Q9Y5B9             | 119838 | 0   | 0  |
| SURF4   | Surfeit 4 OS=F Q5T8U5           | 21114  | 0   | 0  |
| SURF6   | Surfeit locus protein O75683    | 41426  | 0   | 0  |
| SYMPK   | Symplekin OS= Q92797            | 141059 | 0   | 0  |
| SYNCRIP | Heterogeneous O60506            | 69560  | 450 | 9  |
| TAF12   | Transcription initiation Q16514 | 17913  | 32  | 1  |
| TAF15   | TATA-binding protein Q92804     | 61793  | 0   | 12 |
| TAGLN2  | Transgelin-2 O P37802           | 22377  | 0   | 0  |
| TARDBP  | TAR DNA-binding B1AKP7          | 33441  | 42  | 1  |
| TARS    | Threonine--tRNA G3XAN9          | 72022  | 0   | 0  |
| TAX1BP1 | Tax1-binding protein B8ZZD4     | 93551  | 0   | 0  |
| TBCA    | Tubulin-specific E5RHG6         | 15053  | 0   | 0  |
| TBL3    | Transducin beta Q12788          | 88978  | 0   | 0  |
| TCEB1   | Transcription factor R4GMY8     | 6963   | 43  | 1  |
| TCEB2   | Transcription factor I3L0M9     | 15592  | 7   | 0  |
| TCERG1  | Transcription factor O14776     | 123823 | 0   | 0  |
| TCOF1   | Treacle protein J3KQ96          | 144040 | 35  | 1  |
| TECR    | Very-long-chain B3KSQ1          | 37443  | 0   | 0  |
| TEX10   | Testis-express Q9NXF1           | 105608 | 0   | 0  |
| TFAM    | Transcription factor H7BYN3     | 25662  | 0   | 0  |
| TFCP2   | Alpha-globin transcript F8VWL0  | 43906  | 0   | 0  |
| TFG     | Protein TFG (F C9JJP5           | 20352  | 0   | 0  |
| TFIP11  | Tuftelin-interacting Q9UBB9     | 96758  | 0   | 0  |
| THOC2   | THO complex subunit Q8NI27      | 182659 | 0   | 0  |
| THOC6   | THO complex subunit Q86W42      | 37511  | 0   | 0  |
| THRAP3  | Thyroid hormone Q9Y2W1          | 108601 | 0   | 0  |
| TIA1    | Nucleolysin TI/C9JTN7           | 42808  | 0   | 0  |
| TIAL1   | Isoform 2 of Nucleolin Q01085-2 | 43421  | 0   | 0  |
| TIMM13  | Mitochondrial import Q9Y5L4     | 10493  | 0   | 0  |
| TIMM50  | Mitochondrial import M0R003     | 28204  | 73  | 1  |
| TIMM8A  | Mitochondrial import O60220     | 10991  | 0   | 0  |
| TKT     | Transketolase B4E022            | 62839  | 0   | 0  |
| TLN2    | Talin-2 (Fragment H0YMT1        | 154631 | 0   | 0  |
| TMCC3   | Transmembrane G3V207            | 50143  | 0   | 0  |
| TMCO1   | Transmembrane J3QQY2            | 11365  | 0   | 0  |
| TMED10  | Transmembrane P49755            | 24960  | 0   | 0  |
| TMED2   | Transmembrane F5GX39            | 13622  | 0   | 0  |

|          |                          |        |     |   |
|----------|--------------------------|--------|-----|---|
| TMED9    | Transmembran Q9BVK6      | 27260  | 0   | 0 |
| TMEM109  | Transmembran Q9BVC6      | 26194  | 0   | 0 |
| TMEM167A | Protein kish-A Q8TBQ9    | 8054   | 0   | 0 |
| TMEM189  | HCG2044781 C G3V2F7      | 42181  | 0   | 0 |
| TMEM194A | Transmembran G3V5K2      | 12019  | 0   | 0 |
| TMEM200C | Transmembran A6NKL6      | 63889  | 0   | 0 |
| TMEM205  | Transmembran Q6UW68      | 21184  | 0   | 0 |
| TMEM33   | Transmembran D6RAA6      | 25207  | 0   | 0 |
| TMEM43   | Transmembran Q9BTV4      | 44847  | 0   | 0 |
| TMEM97   | Transmembran J3KT68      | 20834  | 0   | 0 |
| TMPO     | Lamina-associ. P42167    | 75446  | 99  | 2 |
| TMPRSS13 | Transmembran J3KQC6      | 63127  | 16  | 0 |
| TNPO3    | Transportin-3 (C9J7E5    | 107978 | 100 | 3 |
| TNRC6B   | Isoform 2 of Tr Q9UPQ9-1 | 182703 | 0   | 0 |
| TNRC6C   | Trinucleotide r G3XAB8   | 179211 | 0   | 0 |
| TOMM22   | Mitochondrial i Q9NS69   | 15512  | 0   | 0 |
| TOMM40   | Mitochondrial i O96008   | 37869  | 0   | 0 |
| TOMM5    | Mitochondrial i F8W8Z9   | 10969  | 0   | 0 |
| TOP1     | DNA topoisom P11387      | 90669  | 0   | 0 |
| TOP2A    | DNA topoisom P11388      | 174276 | 0   | 0 |
| TOP2B    | DNA topoisom Q02880      | 183152 | 0   | 0 |
| TOR1A    | Torsin-1A OS= O14656     | 37784  | 0   | 0 |
| TP53     | Cellular tumor P04637    | 43625  | 0   | 0 |
| TPI1     | Triosephospha U3KPZ0     | 30772  | 0   | 0 |
| TPM1     | Tropomyosin a H0YK48     | 28563  | 0   | 0 |
| TPM3     | Tropomyosin 3 Q5VU58     | 33202  | 0   | 0 |
| TPR      | Nucleoprotein P12270     | 267131 | 0   | 0 |
| TPT1     | Translationally H0YCX0   | 9091   | 0   | 0 |
| TRA2A    | Transformer-2 Q13595     | 32669  | 98  | 2 |
| TRA2B    | Transformer-2 P62995     | 33646  | 134 | 3 |
| TRAM1    | Translocating c G3XAN4   | 33414  | 0   | 0 |
| TRANK1   | TPR and ankyr B7WP88     | 273309 | 31  | 1 |
| TRAP1    | Heat shock pro I3L0K7    | 57184  | 0   | 0 |
| TRAPPC3  | Trafficking pro A6NKE1   | 13335  | 0   | 0 |
| TRDN     | Triadin OS=Ho Q5SWK9     | 80708  | 0   | 0 |
| TRIM21   | E3 ubiquitin-pr F5H012   | 54047  | 4   | 0 |
| TRIM23   | E3 ubiquitin-pr P36406   | 64025  | 0   | 0 |
| TRIM28   | Transcription in M0R0K9  | 88493  | 0   | 0 |
| TRIM46   | Tripartite motif F5GYK0  | 69510  | 0   | 0 |

|          |                         |        |      |    |
|----------|-------------------------|--------|------|----|
| TRIP12   | E3 ubiquitin-pr Q14669  | 220296 | 0    | 0  |
| TRMT112  | tRNA methyltrε J3KNG5   | 13567  | 0    | 0  |
| TRNAU1AP | tRNA selenocy: Q9NX07   | 32477  | 0    | 0  |
| TRRAP    | Transformator H0Y4W2    | 405650 | 0    | 0  |
| TSPAN10  | Tetraspanin-10 Q9H1Z9   | 36475  | 0    | 0  |
| TTN      | Titin (Fragmen H7C1P9   | 109167 | 0    | 0  |
| TUBA1A   | Tubulin alpha-1 Q71U36  | 50104  | 970  | 24 |
| TUBA1C   | Tubulin alpha-1 F5H5D3  | 57693  | 294  | 13 |
| TUBA4B   | Putative tubulin Q9H853 | 27534  | 36   | 7  |
| TUBAL3   | Tubulin alpha c A6NHL2  | 49877  | 0    | 0  |
| TUBB     | Tubulin beta c1 Q5JP53  | 47736  | 92   | 7  |
| TUBB2B   | Tubulin beta-2 Q9BVA1   | 49921  | 96   | 6  |
| TUBB3    | Tubulin beta-3 Q13509   | 50400  | 465  | 13 |
| TUBB4B   | Tubulin beta-4 P68371   | 49799  | 139  | 7  |
| TUBB6    | Tubulin beta-6 Q9BUF5   | 49825  | 35   | 4  |
| TUFM     | Elongation fact P49411  | 49510  | 0    | 0  |
| TXN      | Thioredoxin OS P10599   | 11730  | 0    | 0  |
| TXNDC12  | Thioredoxin do O95881   | 19194  | 0    | 0  |
| TXNDC17  | Thioredoxin do I3L0K2   | 8366   | 0    | 0  |
| TXNL4A   | Thioredoxin-lik K7ESL1  | 16775  | 31   | 1  |
| U2AF1    | Splicing factor Q01081  | 27854  | 200  | 6  |
| U2AF2    | Splicing factor K7ENG2  | 53467  | 981  | 27 |
| U2SURP   | U2 snRNP-ass O15042     | 118219 | 1908 | 81 |
| UBA1     | Ubiquitin-like r Q5JRR9 | 117774 | 0    | 0  |
| UBA52    | Ubiquitin-60S r P62987  | 14719  | 0    | 0  |
| UBB      | Ubiquitin (Frag J3QS39  | 10463  | 110  | 3  |
| UBE2I    | SUMO-conjugε B0QYN7     | 20444  | 0    | 0  |
| UBE2L3   | Ubiquitin-conju P68036  | 17850  | 0    | 0  |
| UBE2M    | NEDD8-conjug P61081     | 20887  | 0    | 0  |
| UBE2NL   | Putative ubiqui Q5JXB2  | 17366  | 0    | 0  |
| UBTF     | Nucleolar trans E9PKP7  | 87380  | 0    | 0  |
| UCHL1    | Ubiquitin carbc D6R956  | 26823  | 0    | 0  |
| UFC1     | Ubiquitin-fold r Q9Y3C8 | 19446  | 0    | 0  |
| UFL1     | E3 UFM1-protε O94874    | 89540  | 0    | 0  |
| UGGT1    | UDP-glucose:g Q9NYU2    | 177078 | 0    | 0  |
| UGT2B15  | UDP-glucuronc P54855    | 60996  | 0    | 0  |
| UQCR10   | Cytochrome b- Q9UDW1    | 7304   | 0    | 0  |
| URB1     | Nucleolar pre-r O60287  | 254227 | 0    | 0  |
| USMG5    | Up-regulated d Q96IX5   | 6453   | 0    | 0  |

|          |                        |        |     |    |
|----------|------------------------|--------|-----|----|
| USP17L24 | Ubiquitin carbc Q0WX57 | 59673  | 0   | 0  |
| USP39    | U4/U6.U5 tri-s B9A018  | 62005  | 0   | 0  |
| USP9X    | Probable ubiqu Q93008  | 292094 | 0   | 0  |
| UTP11L   | Probable U3 sr Q9Y3A2  | 30428  | 0   | 0  |
| UTP14A   | U3 small nucle F8WD00  | 82164  | 0   | 0  |
| UTP15    | U3 small nucle H0Y8P4  | 61393  | 0   | 0  |
| UTP18    | U3 small nucle Q9Y5J1  | 61964  | 0   | 0  |
| UTP20    | Small subunit ꝑ O75691 | 318182 | 0   | 0  |
| UTP3     | Something abo Q9NQZ2   | 54525  | 0   | 0  |
| UTP6     | U3 small nucle Q9NYH9  | 70149  | 0   | 0  |
| UTS2     | Urotensin-2 OS Q5H8X8  | 16266  | 0   | 0  |
| VAC14    | Protein VAC14 H3BN23   | 4527   | 0   | 0  |
| VAPA     | Vesicle-associ Q9P0L0  | 27875  | 0   | 0  |
| VAPB     | Vesicle-associ E5RK64  | 7796   | 0   | 0  |
| VAT1     | Synaptic vesicl K7EJM4 | 3348   | 0   | 0  |
| VCP      | Transitional en P55072 | 89266  | 0   | 0  |
| VDAC1    | Voltage-depen P21796   | 30754  | 0   | 0  |
| VDAC2    | Voltage-depen B4DKM5   | 27462  | 0   | 0  |
| VDAC3    | Voltage-depen F5H740   | 30738  | 0   | 0  |
| VIM      | Vimentin OS=ꝑ P08670   | 53619  | 693 | 14 |
| VMA21    | Vacuolar ATPa Q3ZAQ7   | 11347  | 0   | 0  |
| VPS35    | Vacuolar protei Q96QK1 | 91649  | 0   | 0  |
| VTN      | Vitronectin OS= P04004 | 54271  | 0   | 0  |
| WDR12    | Ribosome biog Q9GZL7   | 47678  | 0   | 0  |
| WDR18    | WD repeat-cor U3KQC1   | 43321  | 0   | 0  |
| WDR26    | WD repeat-cor H0Y9R3   | 33225  | 54  | 1  |
| WDR3     | WD repeat-cor Q9UNX4   | 106032 | 0   | 0  |
| WDR33    | pre-mRNA 3~ ꝑ Q9C0J8   | 145799 | 73  | 2  |
| WDR36    | WD repeat-cor Q8NI36   | 105255 | 0   | 0  |
| WDR43    | WD repeat-cor Q15061   | 74843  | 0   | 0  |
| WDR46    | WD repeat-cor O15213   | 68029  | 0   | 0  |
| WDR65    | WD repeat-cor H7C4D4   | 9380   | 34  | 1  |
| WDR74    | WD repeat-cor Q6RFH5   | 42415  | 0   | 0  |
| WDR75    | WD repeat-cor Q8IWA0   | 94438  | 0   | 0  |
| WDR77    | Methylosome ꝑ H0Y711   | 31079  | 0   | 0  |
| WNT16    | Protein Wnt-1ꝑ Q9UBV4  | 40663  | 0   | 0  |
| WRB      | Tail-anchored ꝑ H7C384 | 9013   | 0   | 0  |
| XP32     | Skin-specific p Q5T750 | 26219  | 33  | 1  |
| XPNPEP3  | Probable Xaa-ꝑ Q9NQH7  | 56997  | 4   | 0  |

|        |                         |        |     |   |
|--------|-------------------------|--------|-----|---|
| XPO1   | Exportin-1 OS= O14980   | 123306 | 0   | 0 |
| XRCC1  | DNA repair pro F5H8D7   | 65924  | 0   | 0 |
| XRCC5  | X-ray repair cr P13010  | 82652  | 0   | 0 |
| XRCC6  | X-ray repair cr P12956  | 69799  | 31  | 0 |
| XRN2   | 5~-3~ exoribor B4DZC3   | 102351 | 0   | 0 |
| YBX1   | Nuclease-sens H0Y449    | 41991  | 0   | 0 |
| YEATS2 | YEATS domain H0Y6M6     | 21152  | 0   | 0 |
| YIF1B  | Protein YIF1B (Q5BJH7   | 34413  | 0   | 0 |
| YLPM1  | YLP motif-conf F8VU51   | 160641 | 0   | 0 |
| YTHDC1 | YTH domain-cl J3QR07    | 85536  | 0   | 0 |
| YTHDC2 | Probable ATP- Q9H6S0    | 160147 | 0   | 0 |
| YWHAB  | 14-3-3 protein P31946   | 28065  | 16  | 1 |
| YWHAE  | 14-3-3 protein P62258   | 29155  | 0   | 0 |
| YWHAG  | 14-3-3 protein P61981   | 28285  | 213 | 5 |
| YWHAH  | 14-3-3 protein A2IDB2   | 28201  | 0   | 0 |
| YWHAQ  | 14-3-3 protein P27348   | 27747  | 0   | 0 |
| YWHAZ  | 14-3-3 protein B0AZS6   | 28019  | 229 | 6 |
| ZADH2  | Zinc-binding al J3KTQ8  | 16158  | 37  | 2 |
| ZBBX   | Zinc finger B-b F2Z370  | 87945  | 30  | 1 |
| ZBTB46 | Zinc finger and Q86UZ6  | 64043  | 0   | 0 |
| ZC3H3  | Zinc finger CC(Q8IXZ2   | 101878 | 0   | 0 |
| ZMYND8 | Protein kinase Q2HXV1   | 126336 | 46  | 1 |
| ZNF277 | Zinc finger prot G5E9M4 | 33831  | 0   | 0 |
| ZNF326 | DBIRD comple: Q5BKZ1    | 65613  | 256 | 7 |
| ZNF638 | Zinc finger prot Q14966 | 220488 | 0   | 0 |
| ZSWIM8 | Zinc finger SW S4R393   | 192863 | 0   | 0 |

| gene name | protein score | group        |
|-----------|---------------|--------------|
| ILF2      | 633           | mRNA binding |
| SNRPD1    | 103           | Sm           |
| SNRPD2    | 354           |              |
| SNRPD3    | 53            |              |
| SNRPE     | 181           |              |
| SNRPF     | 116           |              |
| SNRPG     | 91            |              |
| SNRNP70   | 109           | U1           |
| SNRPA     | 138           |              |
| SNRPC     | 72            |              |
| PHF5A     | 155           | U2           |
| SF3A1     | 1598          |              |
| SF3A2     | 782           |              |
| SF3A3     | 1631          |              |
| SF3B1     | 2799          |              |
| SF3B14    | 161           |              |
| SF3B2     | 2018          |              |
| SF3B3     | 2113          |              |
| SF3B4     | 332           |              |
| SF3B5     | 263           |              |
| SNRPA1    | 666           |              |
| SNRPB2    | 400           |              |
| CHERP     | 1622          | U2 rel       |
| DDX46     | 31            |              |
| DHX15     | 1456          |              |
| DNAJC8    | 704           |              |
| RBM17     | 1190          |              |
| SMNDC1    | 140           |              |
| U2AF1     | 200           |              |
| U2AF2     | 981           |              |
| U2SURP    | 1908          |              |
| C19orf43  | 563           | A            |
| CCAR1     | 1961          |              |
| DDX17     | 192           |              |
| FUS       | 32            |              |
| RBM10     | 1403          |              |



|           |      |           |
|-----------|------|-----------|
| RBM39     | 277  |           |
| RBM5      | 1819 |           |
| SF1       | 754  |           |
| SUGP1     | 1610 |           |
| CD2BP2    | 49   | U5        |
| EFTUD2    | 145  |           |
| PRPF6     | 161  |           |
| PRPF8     | 1900 |           |
| SNRNP200  | 1944 |           |
| TXNL4A    | 31   |           |
| PPIH      | 39   | U4/U6     |
| PRPF3     | 30   |           |
| PRPF4     | 43   |           |
| HSPA8     | 1019 | Prp19     |
| PRPF19    | 79   |           |
| CRNKL1    | 79   | Prp19 rel |
| IK        | 34   | B         |
| SMU1      | 71   |           |
| MATR3     | 257  | C2        |
| RBM4      | 95   |           |
| SRSF1     | 108  | SR        |
| SRSF10    | 27   |           |
| SRSF7     | 33   |           |
| SRSF9     | 266  |           |
| TRA2A     | 98   |           |
| TRA2B     | 134  |           |
| HNRNPA0   | 127  | hnRNP     |
| HNRNPA2B1 | 403  |           |
| HNRNPAB   | 78   |           |
| HNRNPC    | 373  |           |
| HNRNPD    | 87   |           |
| HNRNPF    | 54   |           |
| HNRNPH1   | 79   |           |
| HNRNPH3   | 232  |           |
| HNRNPM    | 847  |           |
| HNRNPR    | 354  |           |
| HNRNPU    | 19   |           |
| PCBP1     | 100  |           |

|           |     |          |
|-----------|-----|----------|
| RALY      | 89  | MISC     |
| RBMX      | 353 |          |
| SYNCRIP   | 450 |          |
| C16orf80  | 207 |          |
| CIRBP     | 20  |          |
| ILF3      | 553 |          |
| KHDRBS1   | 47  | EJC/TREX |
| ACIN1     | 33  |          |
| SAP18     | 241 |          |
| A2M       | 3   |          |
| AARD      | 39  |          |
| ACSL1     | 32  |          |
| ACTB      | 56  |          |
| ACTC1     | 67  |          |
| ACTL6A    | 1   |          |
| ADAR      | 577 |          |
| AGO3      | 86  |          |
| AKAP8     | 204 |          |
| AKAP8L    | 144 |          |
| ALG13     | 32  |          |
| ANP32A    | 1   |          |
| ANP32B    | 32  |          |
| ANP32C    | 98  |          |
| APOBEC3C  | 90  |          |
| ARF6      | 69  |          |
| ARHGEF17  | 33  |          |
| ARL1      | 70  |          |
| ASAP2     | 4   |          |
| ATP6V1C1  | 31  |          |
| BAG4      | 43  |          |
| BLOC1S6   | 68  |          |
| C12orf23  | 47  |          |
| C14orf166 | 373 |          |
| C1QBP     | 82  |          |
| CALCOCO1  | 30  |          |
| CALU      | 31  |          |
| CCNK      | 31  |          |
| CEP85     | 31  |          |

|         |      |
|---------|------|
| CHD4    | 308  |
| CKAP5   | 14   |
| CPA5    | 30   |
| CPSF1   | 264  |
| CPSF2   | 186  |
| CPSF3   | 76   |
| CPSF6   | 219  |
| CPSF7   | 304  |
| CPVL    | 292  |
| CRBN    | 59   |
| CRTAP   | 313  |
| CTTNBP2 | 1    |
| DAPP1   | 11   |
| DDB1    | 132  |
| DDX1    | 170  |
| DDX21   | 46   |
| DDX39   | 11   |
| DDX3Y   | 140  |
| DHX30   | 55   |
| DNAJA3  | 44   |
| DSG1    | 43   |
| DYNC1H1 | 1706 |
| DYNLL2  | 37   |
| EEF1A1  | 44   |
| ENY2    | 101  |
| EP400   | 36   |
| ERH     | 12   |
| FAM124B | 33   |
| FAM188B | 40   |
| FAM98A  | 39   |
| FARP2   | 37   |
| FBL     | 164  |
| FBLL1   | 86   |
| FIP1L1  | 63   |
| FLG     | 9    |
| FNBP4   | 30   |
| GCN1L1  | 141  |
| GIPC2   | 19   |

|           |      |
|-----------|------|
| GJA8      | 30   |
| GRB2      | 71   |
| GTF2I     | 12   |
| H3F3A     | 102  |
| HDAC2     | 48   |
| HIST1H2AG | 67   |
| HIST1H2BN | 86   |
| HNRNPDL   | 27   |
| HNRNPUL2  | 574  |
| HSPA5     | 97   |
| HSPA6     | 46   |
| HSPA9     | 429  |
| IGHG1     | 32   |
| IGHG2     | 7    |
| IGLL5     | 88   |
| INO80     | 32   |
| IREB2     | 74   |
| ITPRIPL2  | 9    |
| KBTBD3    | 1    |
| KIAA0408  | 31   |
| LAMA5     | 32   |
| LANCL1    | 41   |
| LEPRE1    | 517  |
| LMNA      | 74   |
| LMNB1     | 1103 |
| LMNB2     | 232  |
| LRMP      | 3    |
| LUC7L3    | 127  |
| MAP1B     | 116  |
| MDN1      | 538  |
| MEX3A     | 42   |
| MOGS      | 52   |
| MOV10     | 70   |
| MRPL22    | 35   |
| MRPS35    | 51   |
| MSH6      | 144  |
| MYBBP1A   | 154  |
| MYEF2     | 117  |

|          |     |
|----------|-----|
| MYH10    | 33  |
| MYH7     | 32  |
| NKRF     | 199 |
| NME3     | 182 |
| NME4     | 31  |
| NTMT1    | 8   |
| NUDT16L1 | 64  |
| NUDT21   | 574 |
| NUMA1    | 105 |
| NUP205   | 107 |
| NUP210   | 75  |
| PBRM1    | 33  |
| PCNP     | 565 |
| PDCD6    | 242 |
| PELP1    | 55  |
| PEX6     | 12  |
| PLOD1    | 416 |
| PLOD3    | 155 |
| POLG2    | 26  |
| POLR2A   | 68  |
| POLR2C   | 42  |
| POLR2H   | 61  |
| PPIB     | 61  |
| PRC1     | 3   |
| PRKDC    | 534 |
| PRPF39   | 221 |
| RAB15    | 22  |
| RAB33B   | 19  |
| RAB35    | 22  |
| RAB6A    | 19  |
| RAB8B    | 104 |
| RANBP2   | 148 |
| RB1CC1   | 49  |
| RBBP4    | 93  |
| RBBP5    | 40  |
| RBM14    | 551 |
| RBM15    | 92  |
| RBM45    | 71  |

ungrouped

|                 |            |
|-----------------|------------|
| <b>RBM6</b>     | <b>182</b> |
| <b>RBMXL1</b>   | <b>276</b> |
| <b>RCN1</b>     | <b>156</b> |
| <b>RCN2</b>     | <b>51</b>  |
| <b>RP1</b>      | <b>36</b>  |
| <b>RPL17</b>    | <b>121</b> |
| <b>RPL26</b>    | <b>108</b> |
| <b>RPS17L</b>   | <b>54</b>  |
| <b>RPS26P11</b> | <b>31</b>  |
| <b>RPS5</b>     | <b>2</b>   |
| <b>RTCB</b>     | <b>230</b> |
| <b>RTN1</b>     | <b>37</b>  |
| <b>RTN3</b>     | <b>46</b>  |
| <b>RUFY2</b>    | <b>36</b>  |
| <b>RUVBL2</b>   | <b>48</b>  |
| <b>RYR1</b>     | <b>32</b>  |
| <b>SAFB</b>     | <b>342</b> |
| <b>SAFB2</b>    | <b>390</b> |
| <b>SAMM50</b>   | <b>3</b>   |
| <b>SEC16A</b>   | <b>34</b>  |
| <b>SEC23B</b>   | <b>87</b>  |
| <b>SFRS3</b>    | <b>8</b>   |
| <b>SFSWAP</b>   | <b>90</b>  |
| <b>SLC22A5</b>  | <b>34</b>  |
| <b>SLC25A5</b>  | <b>108</b> |
| <b>SMARCA4</b>  | <b>553</b> |
| <b>SMARCC2</b>  | <b>83</b>  |
| <b>SMC1A</b>    | <b>116</b> |
| <b>SNRPN</b>    | <b>345</b> |
| <b>SON</b>      | <b>78</b>  |
| <b>SP140L</b>   | <b>39</b>  |
| <b>SRCRB4D</b>  | <b>43</b>  |
| <b>SSRP1</b>    | <b>44</b>  |
| <b>STK17A</b>   | <b>2</b>   |
| <b>STRBP</b>    | <b>55</b>  |
| <b>TAF12</b>    | <b>32</b>  |
| <b>TARDBP</b>   | <b>42</b>  |
| <b>TCEB1</b>    | <b>43</b>  |

|          |     |
|----------|-----|
| TCEB2    | 7   |
| TCOF1    | 35  |
| TIMM50   | 73  |
| TMPO     | 99  |
| TMPRSS13 | 16  |
| TNPO3    | 100 |
| TRANK1   | 31  |
| TRIM21   | 4   |
| TUBA1A   | 970 |
| TUBA1C   | 294 |
| TUBA4B   | 36  |
| TUBB     | 92  |
| TUBB2B   | 96  |
| TUBB3    | 465 |
| TUBB4B   | 139 |
| TUBB6    | 35  |
| UBB      | 110 |
| VIM      | 693 |
| WDR26    | 54  |
| WDR33    | 73  |
| WDR65    | 34  |
| XP32     | 33  |
| XPNPEP3  | 4   |
| XRCC6    | 31  |
| YWHAB    | 16  |
| YWHAG    | 213 |
| YWHAZ    | 229 |
| ZADH2    | 37  |
| ZBBX     | 30  |
| ZMYND8   | 46  |
| ZNF326   | 256 |

**protein score**

**high**

|             |
|-------------|
| <b>3000</b> |
| <b>2500</b> |
| <b>2000</b> |
| <b>1500</b> |
| <b>1000</b> |
| <b>500</b>  |
| <b>0</b>    |

**low**
