# Supplementary material for: CHERP Regulates the Alternative Splicing of pre-mRNAs in the Nucleus
Source: MDPI journal article supplement (doi:10.3390/ijms23052555), 2022-02-25
Supplement: s1 [file s1]

| Name                                  | Description                                                                                                                                                                                                                                                                                                                                                                                                                                                                                                                                                                                                                                                                                             |
|---------------------------------------|---------------------------------------------------------------------------------------------------------------------------------------------------------------------------------------------------------------------------------------------------------------------------------------------------------------------------------------------------------------------------------------------------------------------------------------------------------------------------------------------------------------------------------------------------------------------------------------------------------------------------------------------------------------------------------------------------------|
| pcDNA5 FRT/TO                         |                                                                                                                                                                                                                                                                                                                                                                                                                                                                                                                                                                                                                                                                                                         |
| pcDNA5 3xFlag FRT/TO                  | 3 × Flag inserted in the HindIII site pcDNA5 FRT/TO                                                                                                                                                                                                                                                                                                                                                                                                                                                                                                                                                                                                                                                     |
| pcDNA5 3xFlag CHERP FRT/TO            | CHERP (coding sequence), 2751bp<br>inserted in the Asp718 I / EcoRV site pcDNA5 3xFlag FRT/TO                                                                                                                                                                                                                                                                                                                                                                                                                                                                                                                                                                                                           |
| pOG44                                 |                                                                                                                                                                                                                                                                                                                                                                                                                                                                                                                                                                                                                                                                                                         |
| pcDNA5 3xFlag RPGR_e14_e15 FRT/TO     | RPGR from exon14 to exon15 (including intron14), 948bp<br>inserted in the BamH I / Xho I site of pcDNA5 3xFlag CHERP FRT/TO<br>ARAP2 from exon23 to exon25 (including intron23 and intron24), 4266bp<br>inserted in the BamH I / Xho I site of pcDNA5 3xFlag CHERP FRT/TO<br>ATG16L1 from exon7 to exon9 (including intron7 and intron8), 1813bp<br>inserted in the BamH I / Xho I site of pcDNA5 3xFlag CHERP FRT/TO<br>PPP1R12A from exon12 to exon14 (including intron12 and intron13), 1739bp<br>inserted in the BamH I / Xho I site of pcDNA5 3xFlag CHERP FRT/TO<br>SIK3 from exon8 to exon10 (including intron8 and intron9), 990bp<br>inserted in the BamH I site of pcDNA5 3xFlag CHERP FRT/TO |
| pcDNA5 3xFlag ARAP2_e23_e25 FRT/TO    |                                                                                                                                                                                                                                                                                                                                                                                                                                                                                                                                                                                                                                                                                                         |
| pcDNA5 3xFlag ATG16L1_e7_e9 FRT/TO    |                                                                                                                                                                                                                                                                                                                                                                                                                                                                                                                                                                                                                                                                                                         |
| pcDNA5 3xFlag PPP1R12A_e12_e14 FRT/TO |                                                                                                                                                                                                                                                                                                                                                                                                                                                                                                                                                                                                                                                                                                         |
| pcDNA5 3xFlag SIK3_e8_e10 FRT/TO      |                                                                                                                                                                                                                                                                                                                                                                                                                                                                                                                                                                                                                                                                                                         |
