# Supplementary material for: CHERP Regulates the Alternative Splicing of pre-mRNAs in the Nucleus
Source: MDPI journal article supplement (doi:10.3390/ijms23052555), 2022-02-25
Supplement: s1 [file s1]

| Name               |         | Nucleotide sequence (5'→3')                               | Used in the                                        |         |
|--------------------|---------|-----------------------------------------------------------|----------------------------------------------------|---------|
| PGK1               | Forward | GTTCGACAGCAAGATCCAGCTC                                    | quantification of mRNA expression                  |         |
|                    | Reverse | GAAGTGGCAATCTCCATGTGTG                                    |                                                    |         |
| CHERP              | Forward | CCAATGTGCTACTCTCGAT                                       | quantification of mRNA expression                  |         |
|                    | Reverse | TGTACTCGTGATCTTCCAGCTT                                    |                                                    |         |
| Forward            | Forward | TGACAAAGCTTGATGATCGAGATGCCGCTGC                           | construction of expression vector wild-type        |         |
|                    | Reverse | GCCACTGTGCTGGATCTACTTACACTGTCCTCTGG                       |                                                    |         |
| tRNA               | Forward | GTAGCTGCGCAGGATTGGAAC                                     | confirmation of the fractionation                  |         |
|                    | Reverse | GTAGTCTGCGCAGGATTGGAAC                                    |                                                    |         |
| U6 snRNA           | Forward | GTGCTCCCTCGGCAAGCACTACACTAAA                              | confirmation of the fractionation                  |         |
|                    | Reverse | CTCAAAAGGAATGCTCACAATTGCGCT                               |                                                    |         |
| E2F8               | Forward | CGGGGAGGAGAAATAAGTACG                                     | confirmation of the fractionation                  |         |
|                    | Reverse | CTTGCTTTTGGGGCTGTTTA                                      |                                                    |         |
| CANT1              | Forward | CCTTCTCACTACGCTTCC                                        | quantification of increased intron inclusion       |         |
|                    | Reverse | GGTCAGGTAGCCCTTTTCA                                       |                                                    |         |
| RPGR               | Forward | GACGCAAGTACAGCTCTTA                                       | quantification of increased intron inclusion       |         |
|                    | Reverse | TTGAATCCTCTGCTCCTTCC                                      |                                                    |         |
|                    | Forward | CGCGGATCCAAACAACAACAATTGGGGAACCTGA                        | construction of minigene wild-type                 |         |
|                    | Reverse | ATATCCGCTCGAGCTCTGCTTTTCTGTAAAGTCATCTGATA                 |                                                    |         |
|                    | Forward | AGATGAGGAAGCAGGTAAAGCACAGGCCA                             | construction of minigene mutant for 5' splice site | 1st PCR |
|                    | Reverse | TGGCCTGTGCTCTTACCTGCTTCTCTCATC                            |                                                    |         |
|                    | Forward | CGCGGATCCAAACAACAACAATTGGGGAACCTGA                        | construction of minigene mutant for 3' splice site | 1st PCR |
|                    | Reverse | ATATCCGCTCGAGCTCTGCTTTTCTGTAAAGTCATCTGATA                 |                                                    |         |
|                    | Forward | GTGATCTCTTTTACAGTATCCAGAGGAGAGAAAGG                       | construction of minigene mutant for 3' splice site | 2nd PCR |
|                    | Reverse | CCCTTCTCTCTCTGCGGATACCTGAAAAGAGATCAC                      |                                                    |         |
|                    | Forward | CGCGGATCCAAACAACAACAATTGGGGAACCTGA                        | construction of minigene mutant for 3' splice site | 2nd PCR |
|                    | Reverse | ATATCCGCTCGAGCTCTGCTTTTCTGTAAAGTCATCTGATA                 |                                                    |         |
| RSRP1              | Forward | GAACAACCAACATTGACTTGC                                     | quantification of increased intron inclusion       |         |
|                    | Reverse | CTTTGCTGGGTAGGTTTTC                                       |                                                    |         |
| DVL3               | Forward | TGAGCAGTGAGCTGGAGACC                                      | quantification of decreased intron inclusion       |         |
|                    | Reverse | CGCGCTTGTGCTTCTCATC                                       |                                                    |         |
| PODXL              | Forward | ACCTACCTGCCAGAGACCA                                       | quantification of decreased intron inclusion       |         |
|                    | Reverse | AGGACGAGCTGCTTCTCACTC                                     |                                                    |         |
| SUPT7L             | Forward | TTTGACCGACACAGATGCCCTG                                    | quantification of decreased intron inclusion       |         |
|                    | Reverse | AGTGTACGAAAAGTGTAGGACCA                                   |                                                    |         |
| ARAP2              | Forward | TGGCCTTGTGCTTTTCATCC                                      | quantification of exon inclusion                   |         |
|                    | Reverse | CAGTCGGGTTCTCTCTTTC                                       |                                                    |         |
| ATG16L1            | Forward | TTGAGGTGATTGTGATGAAAC                                     | quantification of exon inclusion                   |         |
|                    | Reverse | ACTGGGAAGGAGAGACAGA                                       |                                                    |         |
|                    | Forward | CGCGGATCCGATGATGACATTGAGGTCATTGTGGA                       | construction of minigene wild-type                 |         |
|                    | Reverse | CCGCTCGAGGAAGACACACAAGGCAGTAG                             |                                                    |         |
|                    | Forward | CCTTCTCCCTCCCTTTTATGTAAGCGACTCTCGC                        | construction of minigene mutant for 3' splice site | 1st PCR |
|                    | Reverse | GCGAGAGTCGCTTACTATAAAGGAGGGAGGAAAGG                       |                                                    |         |
|                    | Forward | CCATTCTCGCCTCTCTTTAGTAAGCGACTCTCG                         | construction of minigene mutant for 3' splice site | 2nd PCR |
|                    | Reverse | CGAGAGTCGCTTACTAAAGAGGAGGGGAGGATAGG                       |                                                    |         |
|                    | Forward | CGCGGATCCGATGATGACATTGAGGTCATTGTGGA                       | construction of minigene mutant for 3' splice site | 2nd PCR |
|                    | Reverse | CCGCTCGAGGAAGACACACAAGGCAGTAG                             |                                                    |         |
|                    | Forward | TTCTGATTTCTATCACTAATATCTTTGGGTAAAGTTAGAAGACCTTCTCTTTTAAAT | construction of minigene mutant for 5' splice site | 1st PCR |
|                    | Reverse | CACATTAAAGAGAAAGGCTCTTCTAACTACCGAAGATATTAGTAGAATCG        |                                                    |         |
|                    | Forward | TTCTGATTTCTATCACTAATATCTTTGGGTAAAGTTAGAAGACCTTCTCTTTTAAAT | construction of minigene mutant for 5' splice site | 2nd PCR |
|                    | Reverse | TACACATTTAAAGAGAAAGGCTCTTACCCTACCCAAGATATTAGTAGAATCG      |                                                    |         |
|                    | Forward | CGCGGATCCGATGATGACATTGAGGTCATTGTGGA                       | construction of minigene mutant for 5' splice site | 2nd PCR |
|                    | Reverse | CCGCTCGAGGAAGACACACAAGGCAGTAG                             |                                                    |         |
| CLASP1             | Forward | TGCCATGAGAATTCTGAGC                                       | quantification of exon inclusion                   |         |
|                    | Reverse | AACTAGCACAAGTGGTTGAGA                                     |                                                    |         |
| EFCAB14            | Forward | ATCATTCGCTCACCTTCAGC                                      | quantification of exon inclusion                   |         |
|                    | Reverse | ACTGCTTTTTCAGAGTGGCAG                                     |                                                    |         |
| INTS13             | Forward | GAACAACCAAGCAAGTCAGG                                      | quantification of exon inclusion                   |         |
|                    | Reverse | CCCTTTGTACCAACTGTGGA                                      |                                                    |         |
| MAP4K2             | Forward | TGACTTTGGGGTGTCAGG                                        | quantification of exon inclusion                   |         |
|                    | Reverse | CTTATCTCTCAGTTTGGGCG                                      |                                                    |         |
| MON2               | Forward | GCCATTGTGTAGGACACAG                                       | quantification of exon inclusion                   |         |
|                    | Reverse | AATTCAAGGCTACCCATTCC                                      |                                                    |         |
| SNX14              | Forward | CAGAATCACCAACACGCAA                                       | quantification of exon inclusion                   |         |
|                    | Reverse | TCATCTTCACTTCAGCTACA                                      |                                                    |         |
| ZNF207             | Forward | CCTCCAATGACTCAAGCACA                                      | quantification of exon inclusion                   |         |
|                    | Reverse | AATGTAGCTTTGGGGGTTT                                       |                                                    |         |
| ZFAND1             | Forward | GTGTGTGATGATTGTCAGG                                       | quantification of exon inclusion                   |         |
|                    | Reverse | TAACTGCCACAAGTTCTCTC                                      |                                                    |         |
| AURKB              | Forward | GGCGTGGCAGATTCAATTG                                       | quantification of exon skipping                    |         |
|                    | Reverse | TGAGGACAAGTCAGATGGG                                       |                                                    |         |
| CDA7L              | Forward | CTTCCGAGATGATGTTCCCA                                      | quantification of exon skipping                    |         |
|                    | Reverse | GAAAGGCTACTCGAAGACCA                                      |                                                    |         |
| CHFR               | Forward | AAAGCAAGGCATGACACAAG                                      | quantification of exon skipping                    |         |
|                    | Reverse | AGACTTCATCACTTGCACACA                                     |                                                    |         |
| FN1                | Forward | TACCACAACCCCTACAAACG                                      | quantification of exon skipping                    |         |
|                    | Reverse | ACTGCATTGTCTGAAGGAGA                                      |                                                    |         |
| KTN1               | Forward | GAAAAGGCAGAGATGGAACG                                      | quantification of exon skipping                    |         |
|                    | Reverse | ATCACCAAGCTACCTTCTGTC                                     |                                                    |         |
| MYO1B              | Forward | CATCAAAAGCGGTGAAGGA                                       | quantification of exon skipping                    |         |
|                    | Reverse | CAAGCGTTTCAATTCCCTTC                                      |                                                    |         |
| NUP50              | Forward | AAGAAATGCCGAGAAGGAAC                                      | quantification of exon skipping                    |         |
|                    | Reverse | GCGCTTTGCTTCTTTATGG                                       |                                                    |         |
| NUP62              | Forward | AAGAAAGAGGTGGGAGCGG                                       | quantification of exon skipping                    |         |
|                    | Reverse | AGTGAAGCCTGTGCTGTG                                        |                                                    |         |
| OGT                | Forward | AGGCAAGCATTTTGGACAG                                       | quantification of exon skipping                    |         |
|                    | Reverse | GCGAAGCTGCTTCTCAATG                                       |                                                    |         |
| PPP1R12A           | Forward | AGCTCAGTTAATGAAGGATCAACG                                  | quantification of exon skipping                    |         |
|                    | Reverse | TCCCTGACCTCTGTGTGGA                                       |                                                    |         |
| RPP40              | Forward | ACTTCAGGCTATCCATCTC                                       | quantification of exon skipping                    |         |
|                    | Reverse | CTACTTTGGCTGATGCTCC                                       |                                                    |         |
| SIK3               | Forward | GACATGGGACTGGACAAGA                                       | quantification of exon skipping                    |         |
|                    | Reverse | ACAATTGTGTTCTCTGGGTTG                                     |                                                    |         |
|                    | Forward | TACCGAGCTGCTAGTTAATAGCTGAATGCCAACACTAAGGAAG               | construction of minigene wild-type                 |         |
|                    | Reverse | CTGGACTAGTGTAGCTCCACAATTTGGTCTCTGGGTTG                    |                                                    |         |
|                    | Forward | GTTTTGTACTCTTTTCCCCTCTCTTGTAGTCATTAAATC                   | construction of minigene mutant for 3' splice site | 1st PCR |
|                    | Reverse | GATCTTAATGACTACAAGAGAGAGGGGAAAGAGTACAAAAC                 |                                                    |         |
|                    | Forward | CAGGGTTTTGTACTCTTTTCACTCTCTCTGTAGTCATTAAATC               | construction of minigene mutant for 3' splice site | 2nd PCR |
|                    | Reverse | GATCTTAATGACTACAAGAGAGAGGAAAGAGTACAAAACCTG                |                                                    |         |
|                    | Forward | TACCGAGCTGCTAGTTAATAGCTGAATGCCAACACTAAGGAAG               | construction of minigene mutant for 5' splice site | 1st PCR |
|                    | Reverse | CTGGACTAGTGTAGCTCCACAATTTGGTCTCTGGGTTG                    |                                                    |         |
|                    | Forward | CACCACTCAATATCCAGGTAGGAATAACTCCAGTGACCTAG                 | construction of minigene mutant for 5' splice site | 2nd PCR |
|                    | Reverse | CTAGTCACTGGAGTTATTACCACTGGATATTGACTGGTG                   |                                                    |         |
| SKA3               | Forward | GCACCACTCAATATCCAGGTGGCAATAACTCCAGTGACCTAG                | quantification of exon skipping                    |         |
|                    | Reverse | CTAGTCACTGGAGTTATTACCACTGGATATTGACTGGTG                   |                                                    |         |
| TBL1X              | Forward | GTCTTATGACCGATGCTGGG                                      | quantification of exon skipping                    |         |
|                    | Reverse | ATGCTCATCTTAGCCTCAC                                       |                                                    |         |
| pcDNA5 (-specific) | Forward | GTTTTGACCTCCATAGAAGACA                                    | quantification of minigene reporter assay          |         |
|                    | Reverse | TAGAAGGCACAGTCGAGG                                        |                                                    |         |
| BIRC5              | Forward | TTGGCCAGTGTTTCTCTGC                                       | quantification of mRNA expression                  |         |
|                    | Reverse | TGACAGAAAGGAAGCGCAACC                                     |                                                    |         |
| AURKB              | Forward | AGAAGCAATTGCAGGCAACCAG                                    | quantification of mRNA expression                  |         |
|                    | Reverse | GTTTTGATGCCAGTTCTCTCTAG                                   |                                                    |         |
| CENPA              | Forward | AAGCTTCAGAGAGCACACACC                                     | quantification of mRNA expression                  |         |
|                    | Reverse | TGCCAATTGAAGTCCACACCAC                                    |                                                    |         |
| BRCA1              | Forward | GTCCCATCTGTCTGGAGTTG                                      | quantification of mRNA expression                  |         |
|                    | Reverse | GCCCTTTCTCTGGTTGAGA                                       |                                                    |         |
